# Supplementary material for: Dehydrative formation and biological evaluation of allylic sulfonamides from allylic alcohols using recyclable silica-supported acid catalysts
Source: Royal Society of Chemistry journal article supplement (doi:10.1039/d6ra01478j), 2026-04-07
Supplement: d6ra01478j1.pdf [file d6ra01478j1.pdf]

### Experimental Supporting Information

#### **Dehydrative formation and biological evaluation of allylic sulfonamides from allylic alcohols using recyclable silica-supported acid catalysts**

Zachary C. Brandeburg, Kourtney L. Koster, Bhavya Krishnan, Brian Y. Yang, Hannah Zhou, Jacob T. Sinkwich, Patrick M. Kampmeyer, Robert J. Sheaff\*, and Angus A. Lamar\*

Department of Chemistry and Biochemistry, The University of Tulsa, 800 S. Tucker Dr., Tulsa, OK 74104, USA.

[robert-sheaff@utulsa.edu](mailto:robert-sheaff@utulsa.edu)

[angus-lamar@utulsa.edu](mailto:angus-lamar@utulsa.edu)

#### Index

|                                                                                                          |      |
|----------------------------------------------------------------------------------------------------------|------|
| <b>Table S1.</b> Optimization of reaction conditions                                                     | S-2  |
| <b>Figure S1.</b> Comparison of 65 °C and 20 ° for reaction with ( <i>E</i> )-1,3-diphenyl-2-propen-1-ol | S-4  |
| <b>Figure S2.</b> Comparison of 45 °C and 20 ° for reaction with cyclohex-2-en-1-ol                      | S-4  |
| <b>Figures S3-S31.</b> <sup>1</sup> H and <sup>13</sup> C NMR Spectra of Products <b>3-31</b>            | S-5  |
| <b>Table S2.</b> Cytotoxicity screening of <b>3-31</b> (24 h; CTB)                                       | S-34 |
| <b>Table S3.</b> OXPHOS inhibition screening of <b>3-31</b> (2 h; CTG)                                   | S-35 |
| <b>Figure S32.</b> Luciferase inhibition assay of <b>3-31</b>                                            | S-36 |

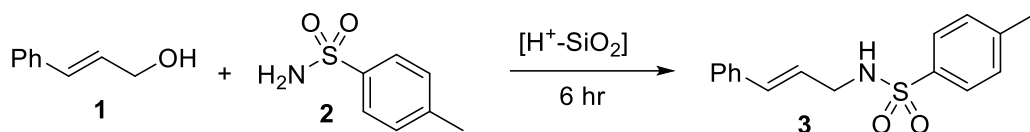

| Entry     | Equiv 1  | Equiv 2  | SiO <sub>2</sub> catalyst  | [H <sup>+</sup> -SiO <sub>2</sub> ]<br>amount<br>(mg) | Temp<br>(°C) | Solvent<br>Concentration | Solvent                 | % Yld <b>3</b><br>( <sup>1</sup> H NMR) |
|-----------|----------|----------|----------------------------|-------------------------------------------------------|--------------|--------------------------|-------------------------|-----------------------------------------|
| 1         | 1        | 1.1      | SA (3 mol%)                | 55                                                    | 65           | 0.25                     | CDCl <sub>3</sub>       | 15                                      |
| 2         | 1        | 1.1      | TfOH (3 mol%)              | 55                                                    | 65           | 0.25                     | CDCl <sub>3</sub>       | 24                                      |
| 3         | 1        | 1.1      | HClO <sub>4</sub> (3 mol%) | 55                                                    | 65           | 0.25                     | CDCl <sub>3</sub>       | 32                                      |
| 4         | 1        | 1.1      | PTSA (3 mol%)              | 55                                                    | 65           | 0.25                     | CDCl <sub>3</sub>       | 43                                      |
| 5         | 1        | 1.1      | SA (6 mol%)                | 55                                                    | 65           | 0.25                     | CDCl <sub>3</sub>       | 5                                       |
| 6         | 1        | 1.1      | TfOH (6 mol%)              | 55                                                    | 65           | 0.25                     | CDCl <sub>3</sub>       | 3                                       |
| 7         | 1        | 1.1      | HClO <sub>4</sub> (6 mol%) | 55                                                    | 65           | 0.25                     | CDCl <sub>3</sub>       | 9                                       |
| 8         | 1        | 1.1      | PTSA (6 mol%)              | 55                                                    | 65           | 0.25                     | CDCl <sub>3</sub>       | 49                                      |
| 9         | 1        | 1.1      | SA (3 mol%)                | 30                                                    | 65           | 0.25                     | CDCl <sub>3</sub>       | 26                                      |
| 10        | 1        | 1.1      | SA (3 mol%)                | 80                                                    | 65           | 0.25                     | CDCl <sub>3</sub>       | 15                                      |
| 11        | 1        | 1.1      | SA (6 mol%)                | 30                                                    | 65           | 0.25                     | CDCl <sub>3</sub>       | 34                                      |
| 12        | 1        | 1.1      | SA (6 mol%)                | 80                                                    | 65           | 0.25                     | CDCl <sub>3</sub>       | 8                                       |
| 13        | 1        | 1.1      | TfOH (3 mol%)              | 30                                                    | 65           | 0.25                     | CDCl <sub>3</sub>       | 11                                      |
| 14        | 1        | 1.1      | TfOH (3 mol%)              | 80                                                    | 65           | 0.25                     | CDCl <sub>3</sub>       | 14                                      |
| 15        | 1        | 1.1      | TfOH (6 mol%)              | 30                                                    | 65           | 0.25                     | CDCl <sub>3</sub>       | 13                                      |
| 16        | 1        | 1.1      | TfOH (6 mol%)              | 80                                                    | 65           | 0.25                     | CDCl <sub>3</sub>       | 14                                      |
| 17        | 1        | 1.1      | HClO <sub>4</sub> (3 mol%) | 30                                                    | 65           | 0.25                     | CDCl <sub>3</sub>       | 11                                      |
| 18        | 1        | 1.1      | HClO <sub>4</sub> (3 mol%) | 80                                                    | 65           | 0.25                     | CDCl <sub>3</sub>       | 8                                       |
| 19        | 1        | 1.1      | HClO <sub>4</sub> (6 mol%) | 30                                                    | 65           | 0.25                     | CDCl <sub>3</sub>       | 9                                       |
| 20        | 1        | 1.1      | HClO <sub>4</sub> (6 mol%) | 80                                                    | 65           | 0.25                     | CDCl <sub>3</sub>       | 12                                      |
| 21        | 1        | 1.1      | PTSA (3 mol%)              | 30                                                    | 65           | 0.25                     | CDCl <sub>3</sub>       | 46                                      |
| 22        | 1        | 1.1      | PTSA (3 mol%)              | 80                                                    | 65           | 0.25                     | CDCl <sub>3</sub>       | 48                                      |
| 23        | 1        | 1.1      | PTSA (6 mol%)              | 30                                                    | 65           | 0.25                     | CDCl <sub>3</sub>       | 48                                      |
| 24        | 1        | 1.1      | PTSA (6 mol%)              | 80                                                    | 65           | 0.25                     | CDCl <sub>3</sub>       | 42                                      |
| 25        | 1        | 2        | PTSA (3 mol%)              | 55                                                    | 65           | 0.25                     | CDCl <sub>3</sub>       | 58                                      |
| 26        | 1        | 0.5      | PTSA (3 mol%)              | 55                                                    | 65           | 0.25                     | CDCl <sub>3</sub>       | 32                                      |
| 27        | 1        | 3        | PTSA (3 mol%)              | 55                                                    | 65           | 0.25                     | CDCl <sub>3</sub>       | 63                                      |
| 28        | 1        | 1.5      | PTSA (3 mol%)              | 55                                                    | 65           | 0.25                     | CDCl <sub>3</sub>       | 64                                      |
| 29        | 1        | 2.5      | PTSA (3 mol%)              | 55                                                    | 65           | 0.25                     | CDCl <sub>3</sub>       | 61                                      |
| <b>30</b> | <b>1</b> | <b>2</b> | <b>PTSA (6 mol%)</b>       | <b>55</b>                                             | <b>65</b>    | <b>0.25</b>              | <b>CDCl<sub>3</sub></b> | <b>68</b>                               |
| 31        | 1        | 3        | PTSA (6 mol%)              | 55                                                    | 65           | 0.25                     | CDCl <sub>3</sub>       | 63                                      |
| 32        | 1        | 1.5      | PTSA (6 mol%)              | 55                                                    | 65           | 0.25                     | CDCl <sub>3</sub>       | 52                                      |
| 33        | 1        | 2.5      | PTSA (6 mol%)              | 55                                                    | 65           | 0.25                     | CDCl <sub>3</sub>       | 58                                      |
| 34        | 1        | 1.1      | PTSA (3 mol%)              | 55                                                    | 85           | 0.25                     | CDCl <sub>3</sub>       | 45                                      |
| 35        | 1        | 1.1      | PTSA (3 mol%)              | 55                                                    | 105          | 0.25                     | CDCl <sub>3</sub>       | 50                                      |
| 36        | 1        | 2        | PTSA (6 mol%)              | 55                                                    | 105          | 0.33                     | CDCl <sub>3</sub>       | 50                                      |
| 37        | 1        | 2        | PTSA (6 mol%)              | 30                                                    | 105          | 0.25                     | CDCl <sub>3</sub>       | 59                                      |
| 38        | 1        | 2        | PTSA (6 mol%)              | 55                                                    | 105          | 0.25                     | CDCl <sub>3</sub>       | 44                                      |
| 39        | 1        | 1.1      | PTSA (3 mol%)              | 55                                                    | 65           | 0.33                     | CDCl <sub>3</sub>       | 55                                      |
| 40        | 1        | 1.1      | PTSA (3 mol%)              | 55                                                    | 65           | 0.17                     | CDCl <sub>3</sub>       | 48                                      |
| 41        | 1        | 2        | PTSA (3 mol%)              | 30                                                    | 65           | 0.25                     | CDCl <sub>3</sub>       | 64                                      |
| 42        | 1        | 2        | PTSA (3 mol%)              | 80                                                    | 65           | 0.25                     | CDCl <sub>3</sub>       | 48                                      |
| 43        | 1        | 3        | PTSA (3 mol%)              | 30                                                    | 65           | 0.25                     | CDCl <sub>3</sub>       | 66                                      |
| 44        | 1        | 2        | PTSA (6 mol%)              | 30                                                    | 65           | 0.33                     | CDCl <sub>3</sub>       | 66                                      |

|    |   |     |               |    |    |      |                   |            |
|----|---|-----|---------------|----|----|------|-------------------|------------|
| 45 | 1 | 2   | PTSA (6 mol%) | 30 | 65 | 0.33 | CDCl <sub>3</sub> | 66         |
| 46 | 1 | 2   | PTSA (6 mol%) | 30 | 65 | 0.25 | CDCl <sub>3</sub> | 65         |
| 47 | 1 | 2   | PTSA (6 mol%) | 55 | 65 | 0.33 | CDCl <sub>3</sub> | 62         |
| 48 | 1 | 3   | PTSA (6 mol%) | 30 | 65 | 0.33 | CDCl <sub>3</sub> | 52         |
| 49 | 1 | 2   | PTSA (6 mol%) | 55 | 65 | 0.33 | CDCl <sub>3</sub> | 67         |
| 50 | 1 | 2   | PTSA (6 mol%) | 55 | 65 | 0.17 | CDCl <sub>3</sub> | 60         |
| 51 | 1 | 3   | PTSA (3 mol%) | 55 | 65 | 0.33 | CDCl <sub>3</sub> | 56         |
| 52 | 1 | 3   | PTSA (3 mol%) | 55 | 65 | 0.17 | CDCl <sub>3</sub> | 58         |
| 53 | 1 | 1.1 | PTSA (3 mol%) | 55 | 65 | 0.25 | THF               | 0          |
| 54 | 1 | 1.1 | PTSA (3 mol%) | 55 | 65 | 0.25 | DCE               | 32         |
| 55 | 1 | 1.1 | PTSA (3 mol%) | 55 | 65 | 0.25 | DCM               | 38         |
| 56 | 1 | 1.1 | PTSA (3 mol%) | 55 | 65 | 0.25 | CDCl <sub>3</sub> | 36 (2 hrs) |
| 57 | 1 | 1.1 | PTSA (3 mol%) | 55 | 65 | 0.25 | CDCl <sub>3</sub> | 42 (4 hrs) |
| 58 | 1 | 1.1 | PTSA (3 mol%) | 55 | 65 | 0.25 | CDCl <sub>3</sub> | 43 (6 hrs) |

All yields determined by <sup>1</sup>H NMR using 1,3-dinitrobenzene as internal standard. SA = sulfuric acid; TfOH = triflic acid; HClO<sub>4</sub> = perchloric acid; PTSA = p-toluenesulfonic acid. THF = tetrahydrofuran; DCE = dichloroethane; DCM = dichloromethane.

**Table S1.** Optimization of reaction conditions.

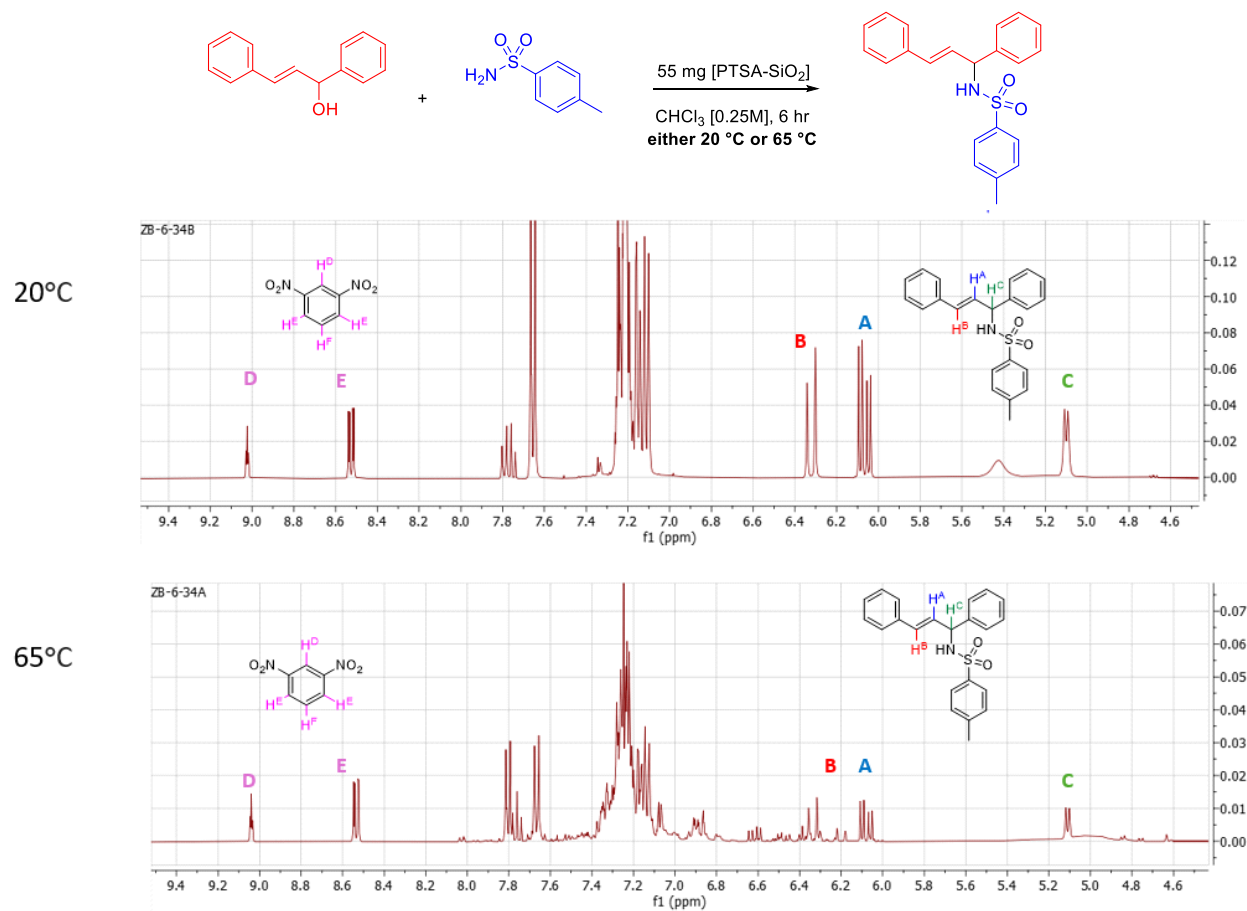

**Figure S1.** Comparison of reactions performed at 20 °C and 65 °C for 6 hours. 400 MHz  $^1\text{H}$ -NMR in  $\text{CDCl}_3$  of Product **4** with 1,3-dinitrobenzene as internal standard.

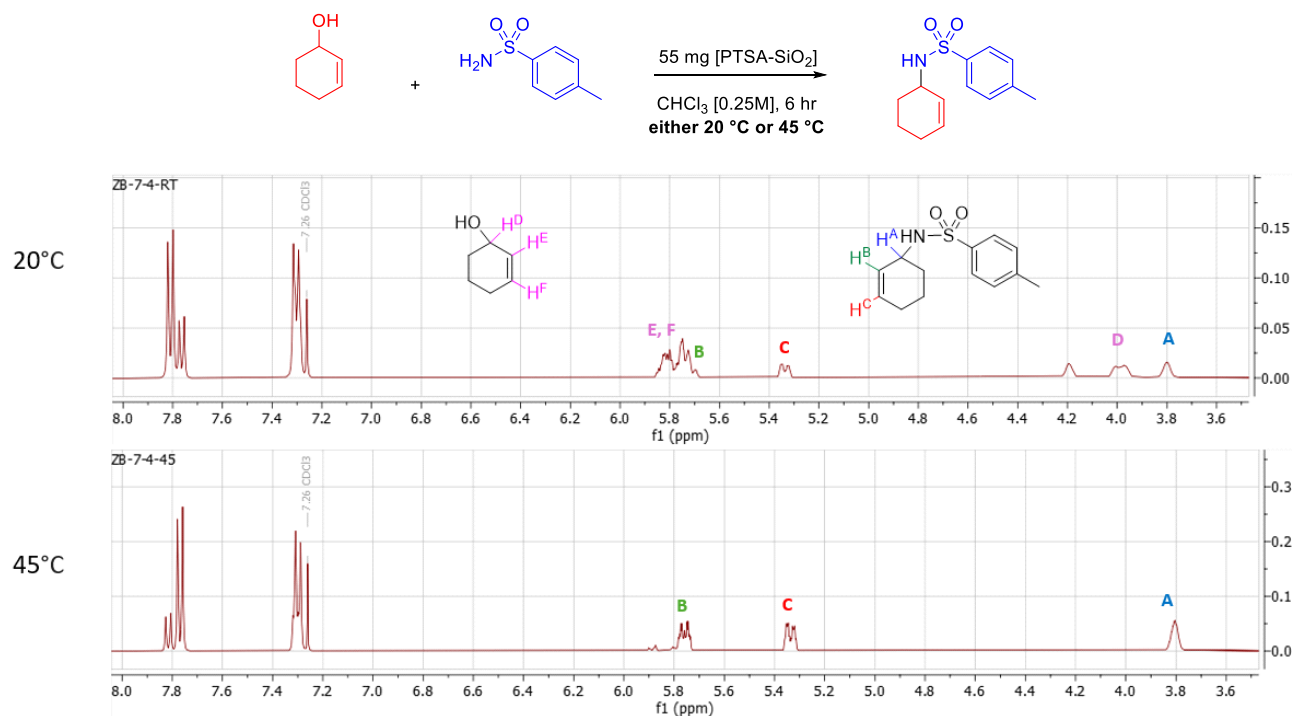

**Figure S2.** Comparison of reactions performed at 20 °C and 45 °C for 6 hours. 400 MHz  $^1\text{H}$ -NMR in  $\text{CDCl}_3$  of cyclohex-2-en-1-ol starting material and Product **22**.

### Product Characterization (spectra):

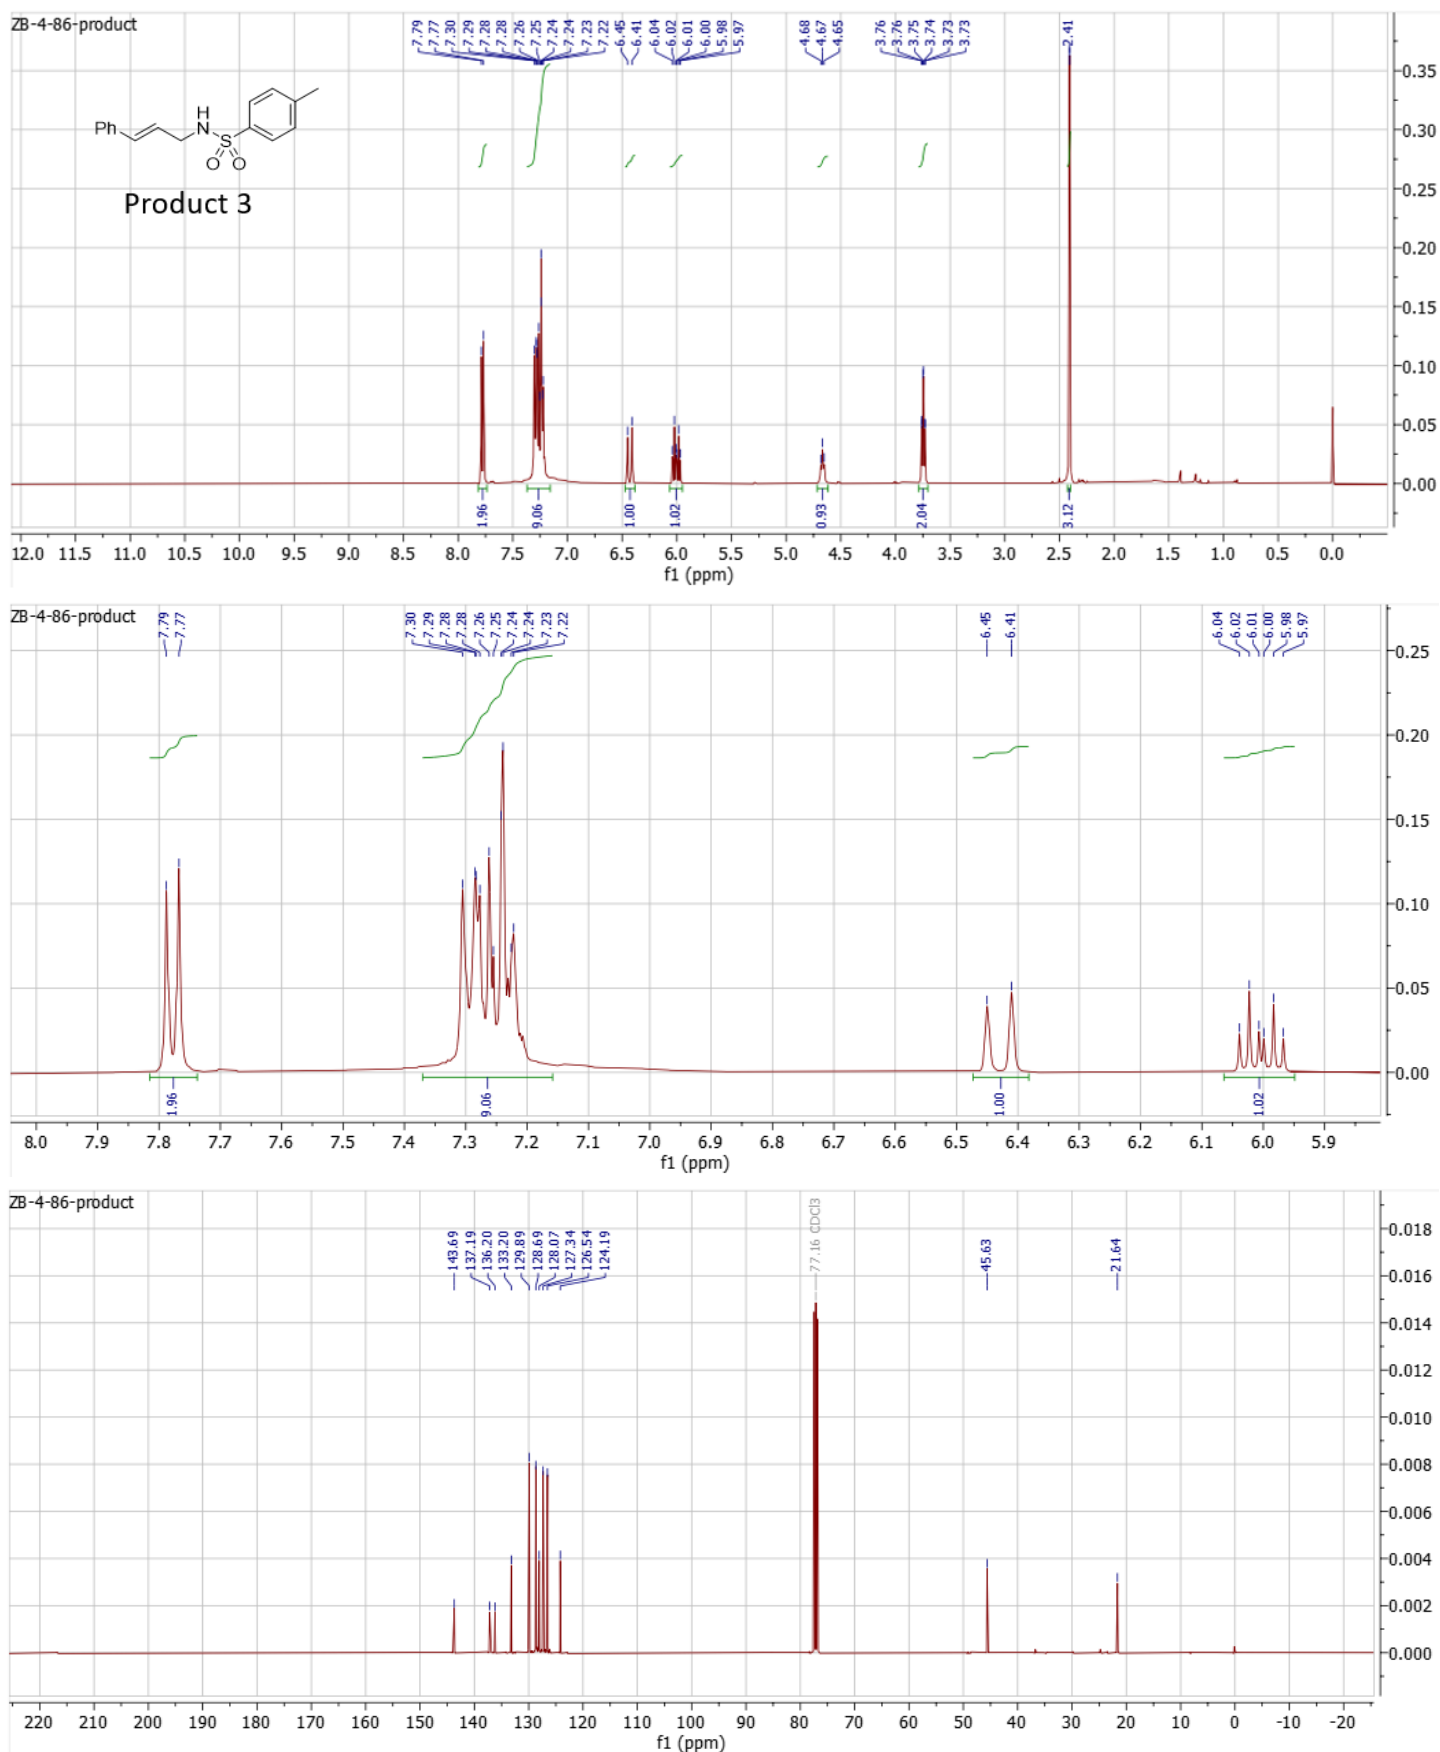

Figure S3. 400 MHz <sup>1</sup>H-NMR in CDCl<sub>3</sub> (full and zoom-in of aromatic region) and 101 MHz <sup>13</sup>C{<sup>1</sup>H} NMR in CDCl<sub>3</sub> of Product 3.

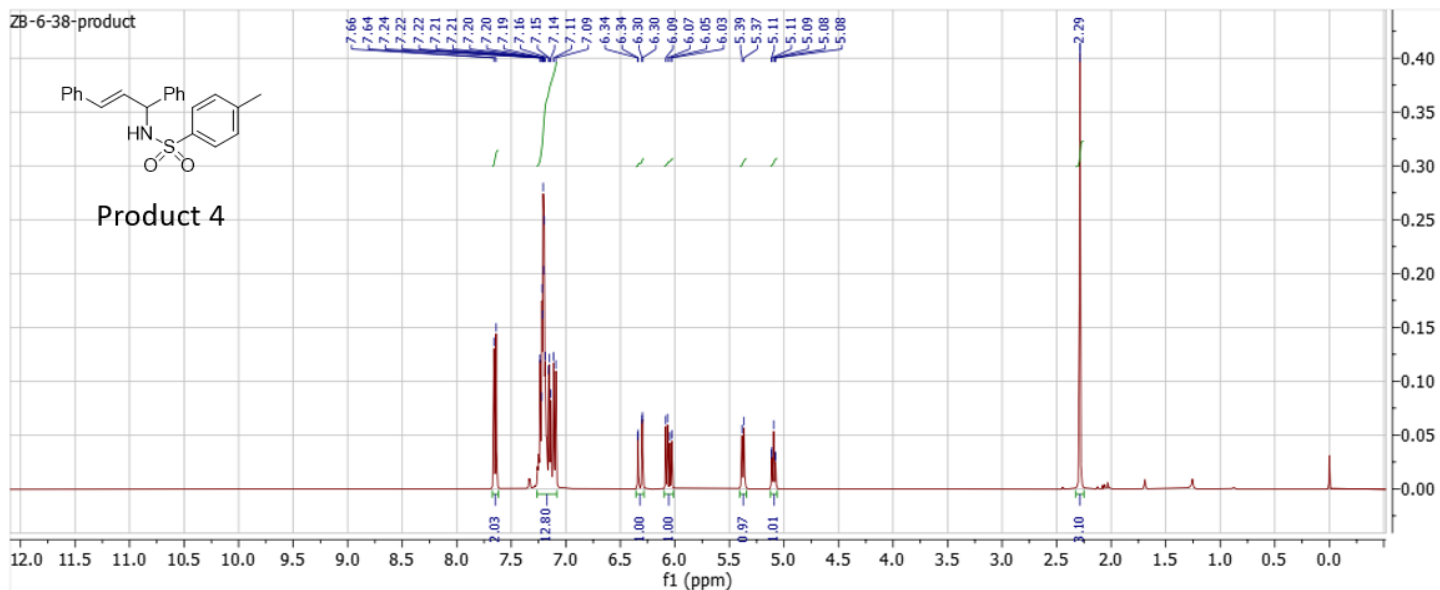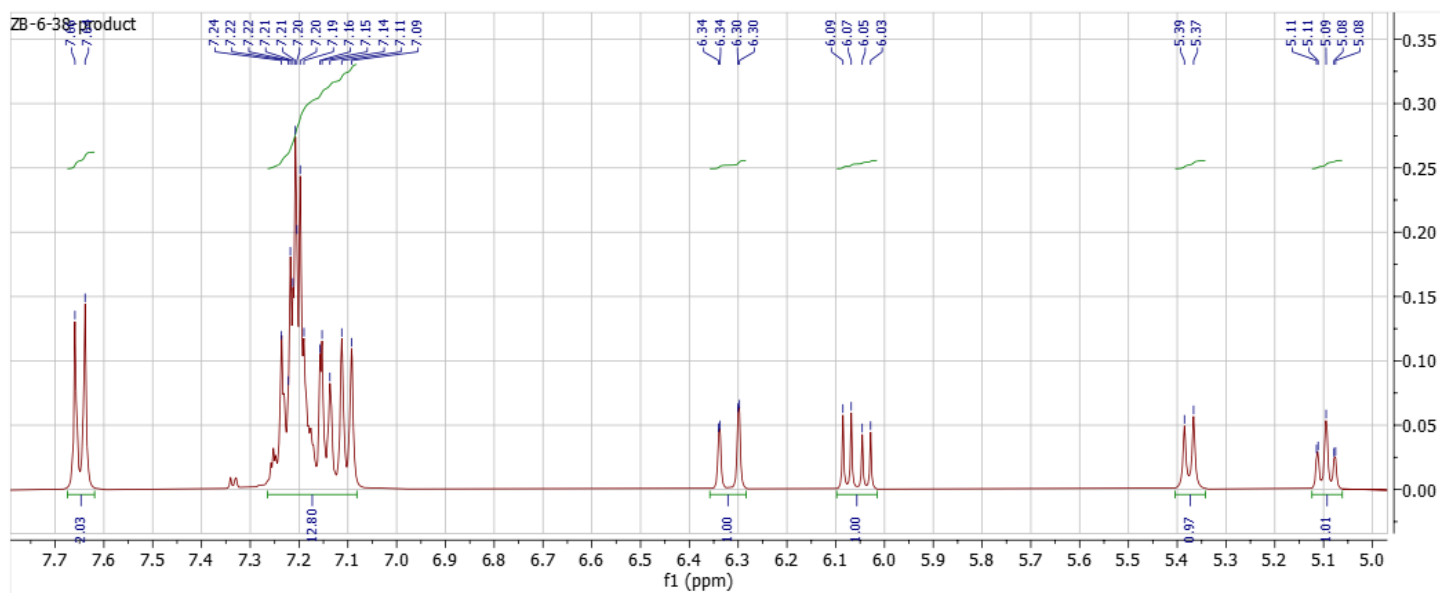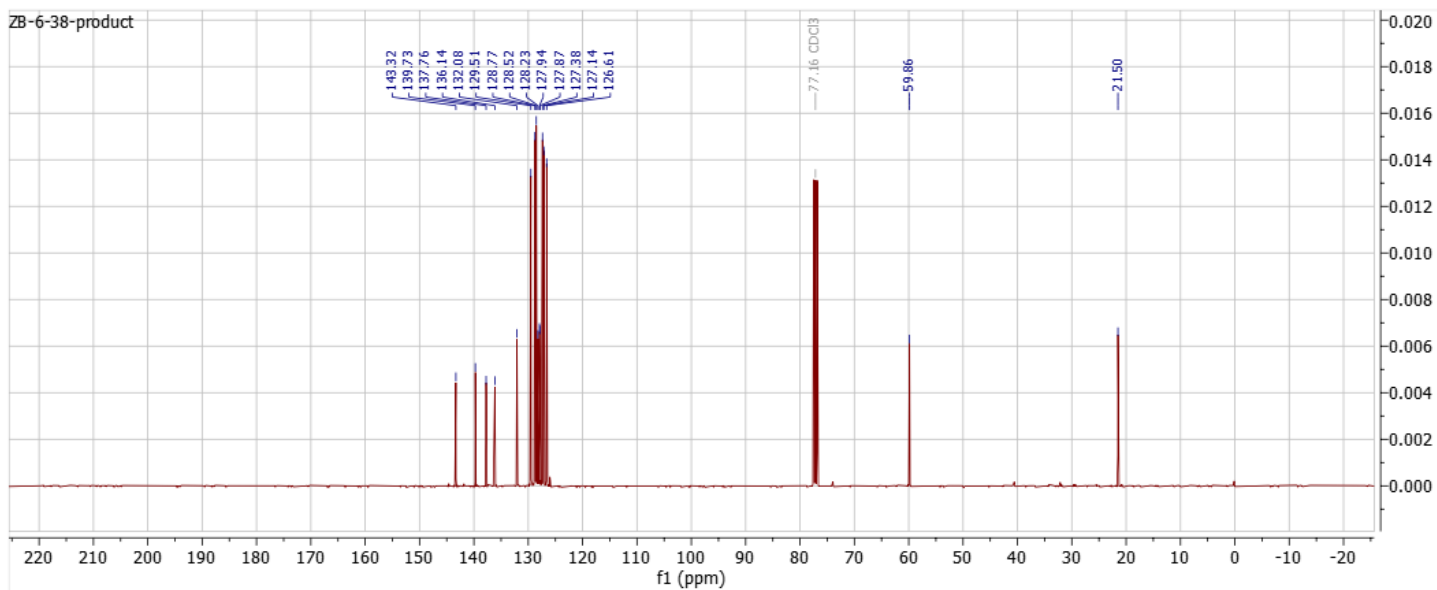

Figure S4. 400 MHz  $^1\text{H}$ -NMR in  $\text{CDCl}_3$  (full and zoom-in of aromatic region) and 101 MHz  $^{13}\text{C}\{^1\text{H}\}$  NMR in  $\text{CDCl}_3$  of Product 4.

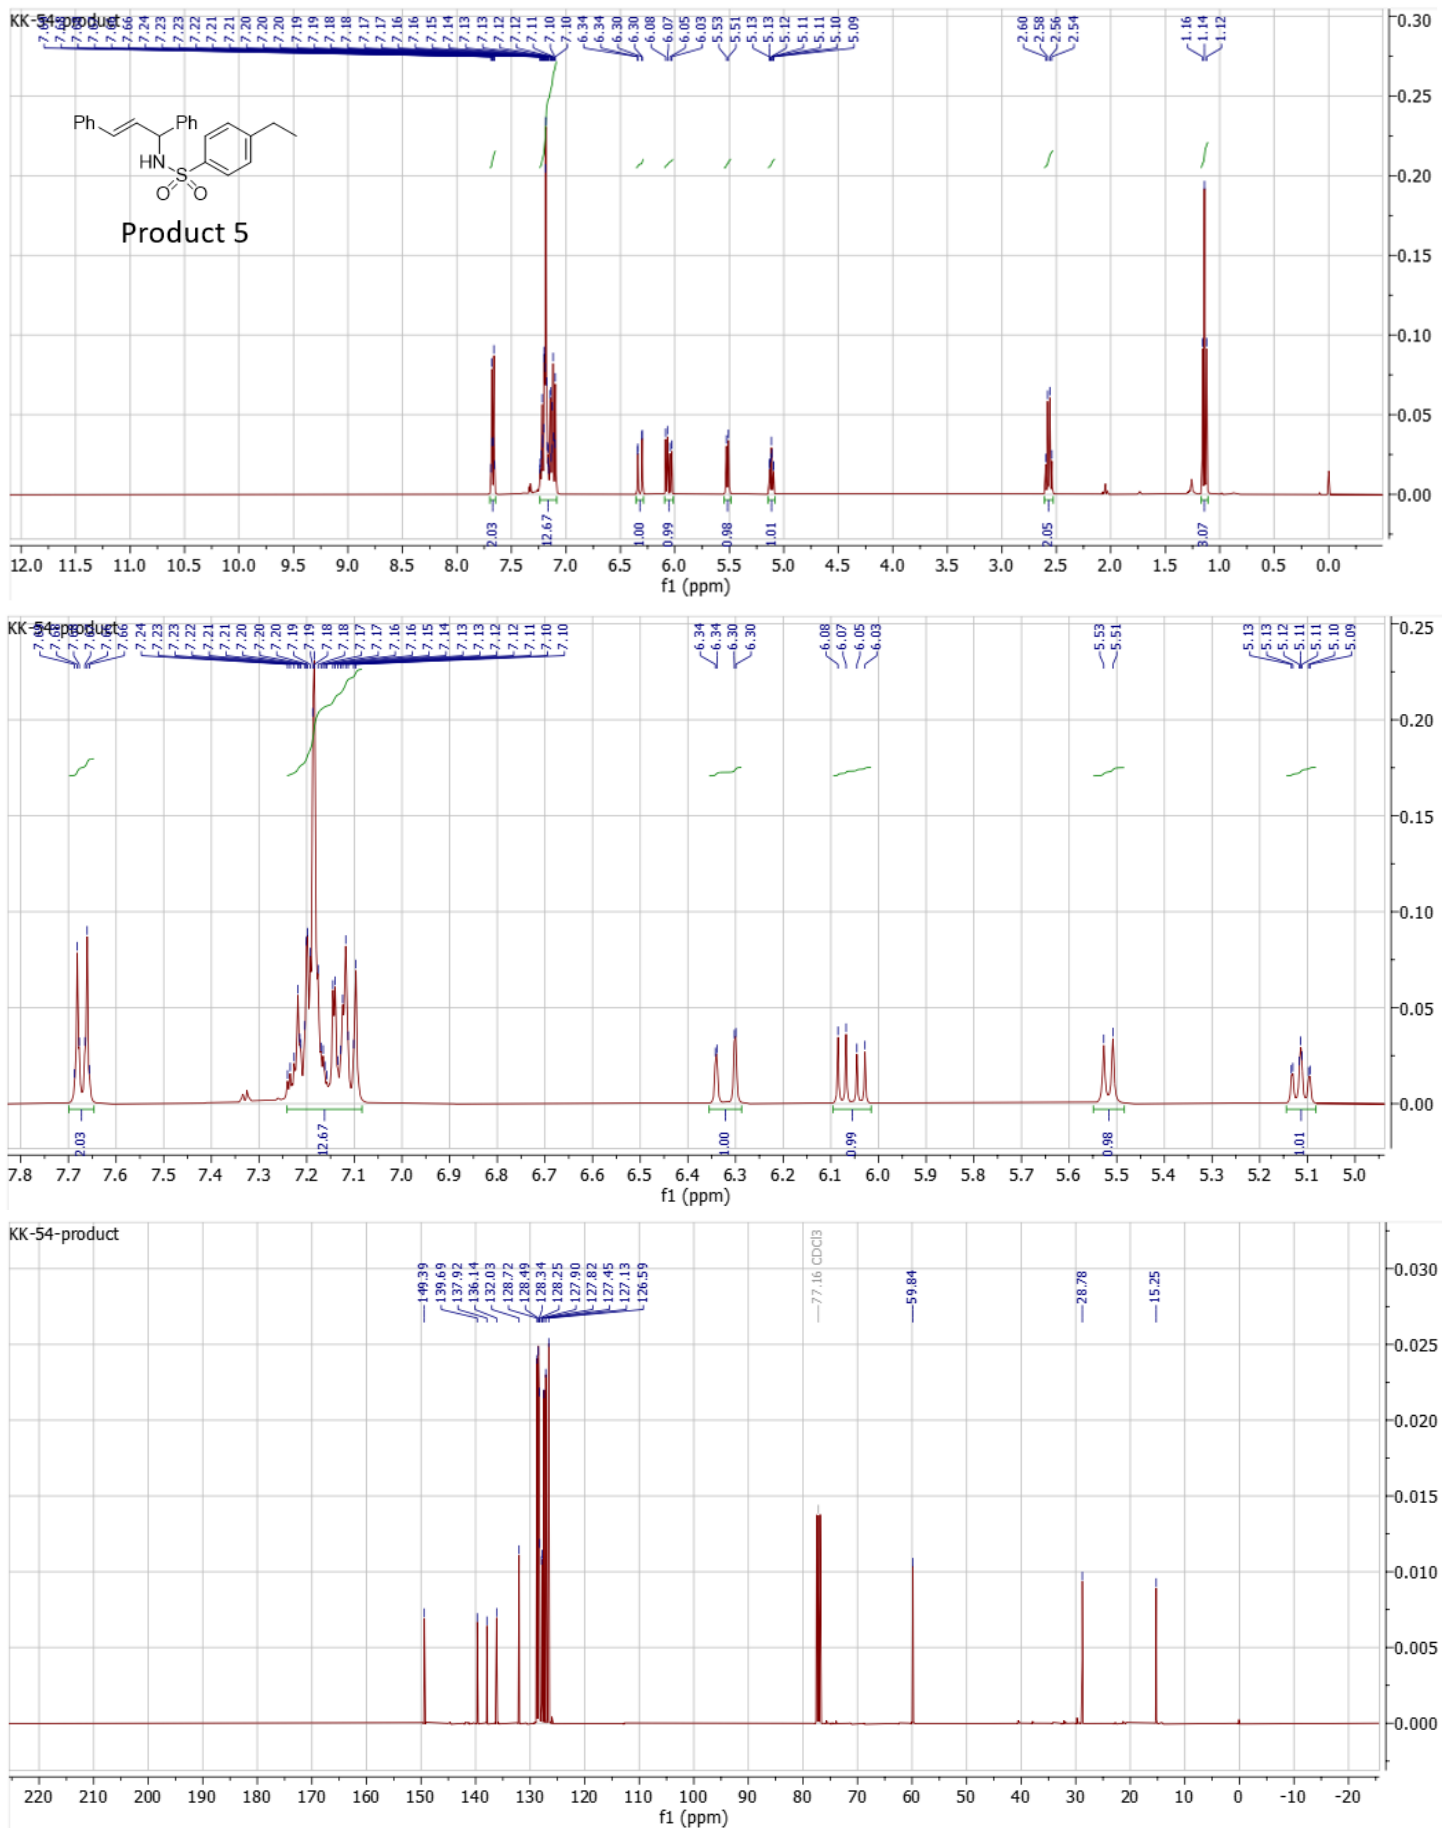

Figure S5. 400 MHz  $^1\text{H-NMR}$  in  $\text{CDCl}_3$  (full and zoom-in of aromatic region) and 101 MHz  $^{13}\text{C}\{^1\text{H}\}$  NMR in  $\text{CDCl}_3$  of Product 5.

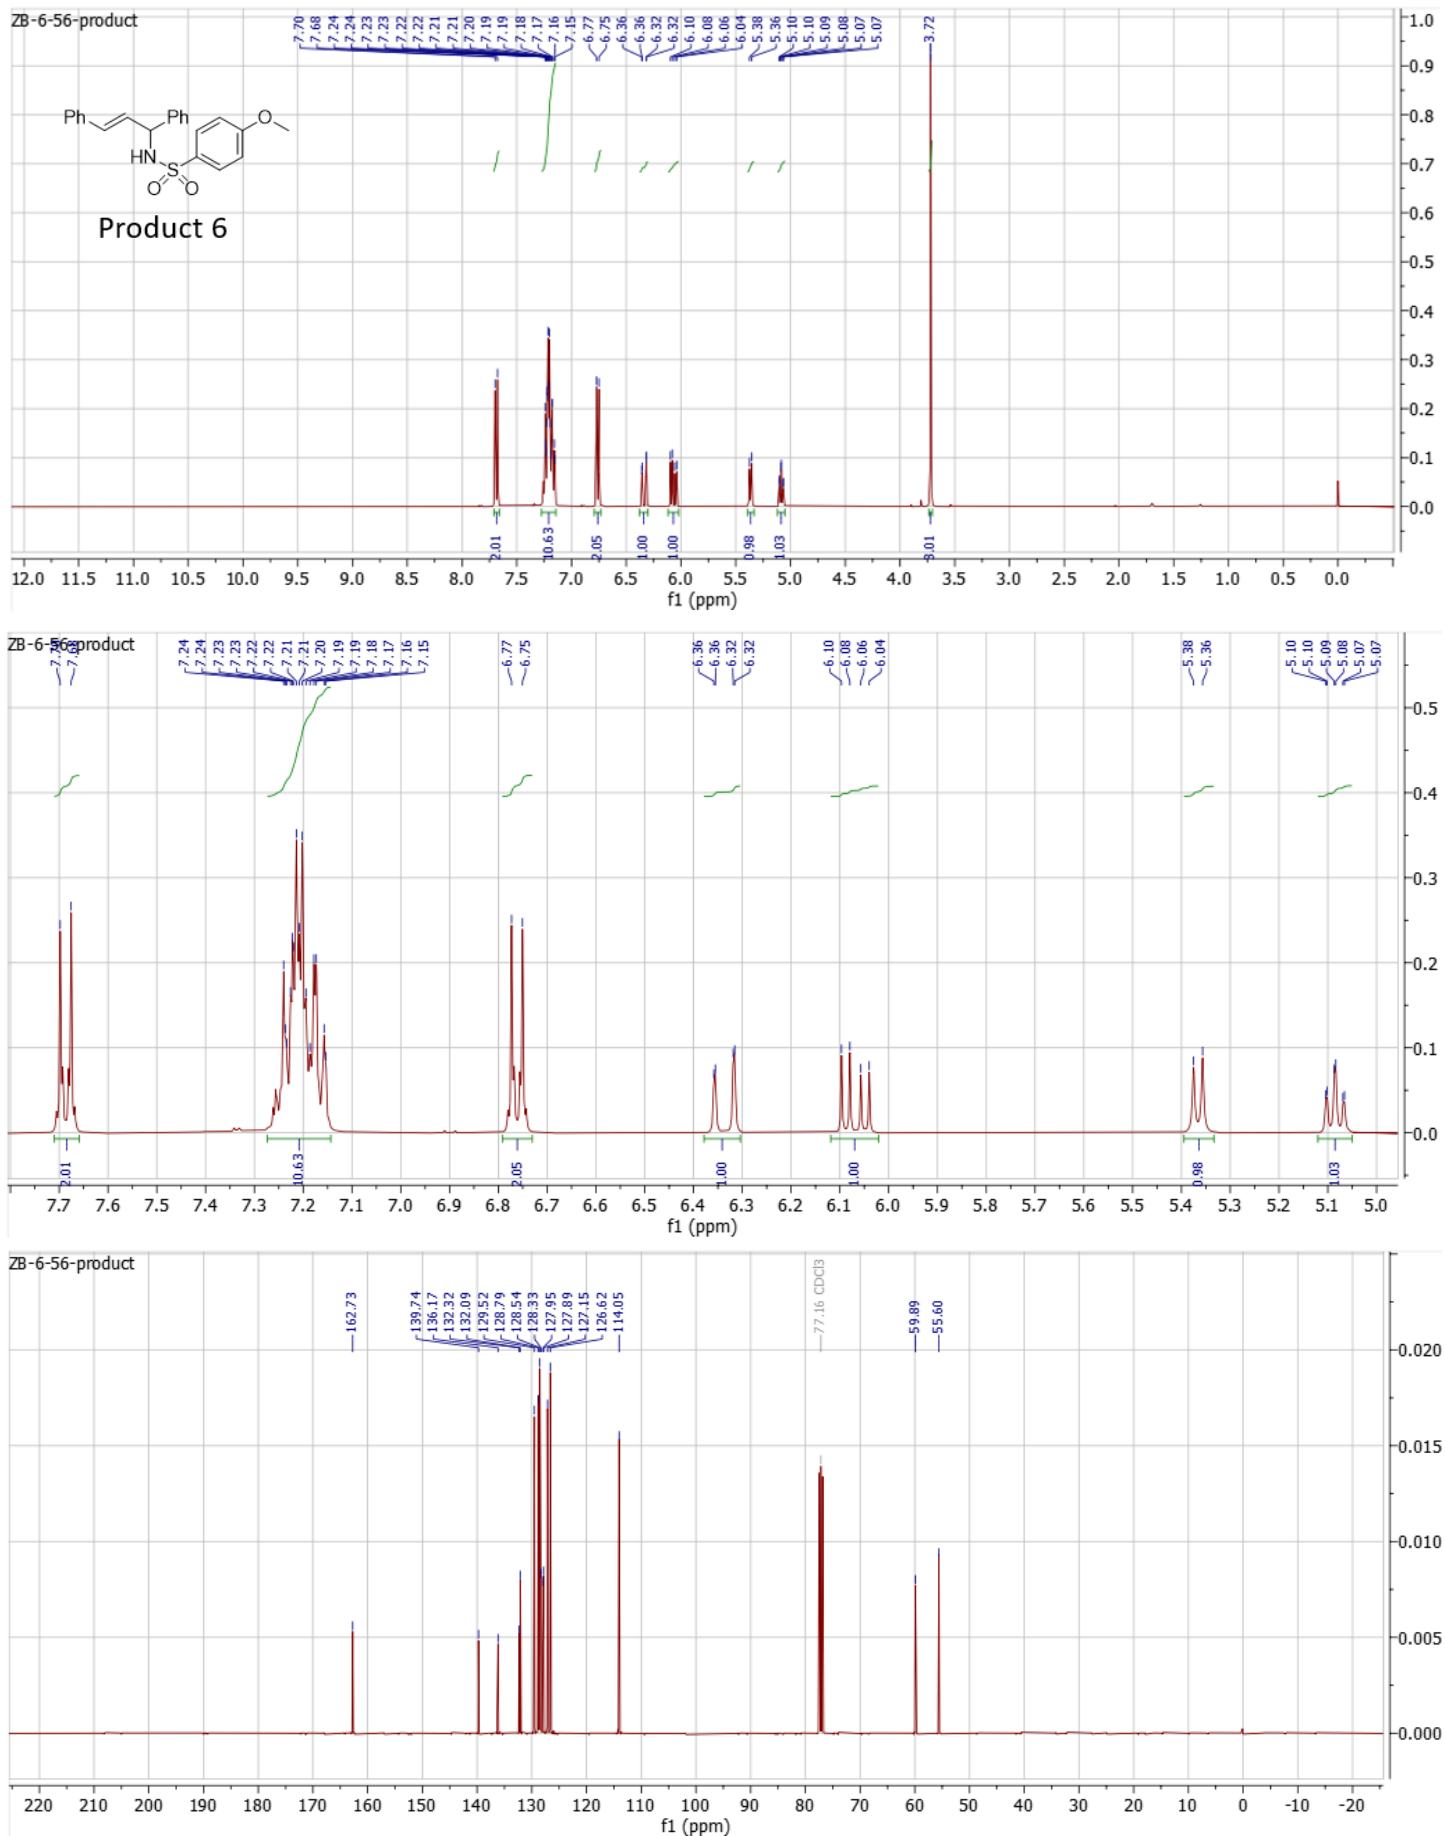

Figure S6. 400 MHz <sup>1</sup>H-NMR in CDCl<sub>3</sub> (full and zoom-in of aromatic region) and 101 MHz <sup>13</sup>C{<sup>1</sup>H} NMR in CDCl<sub>3</sub> of Product 6.

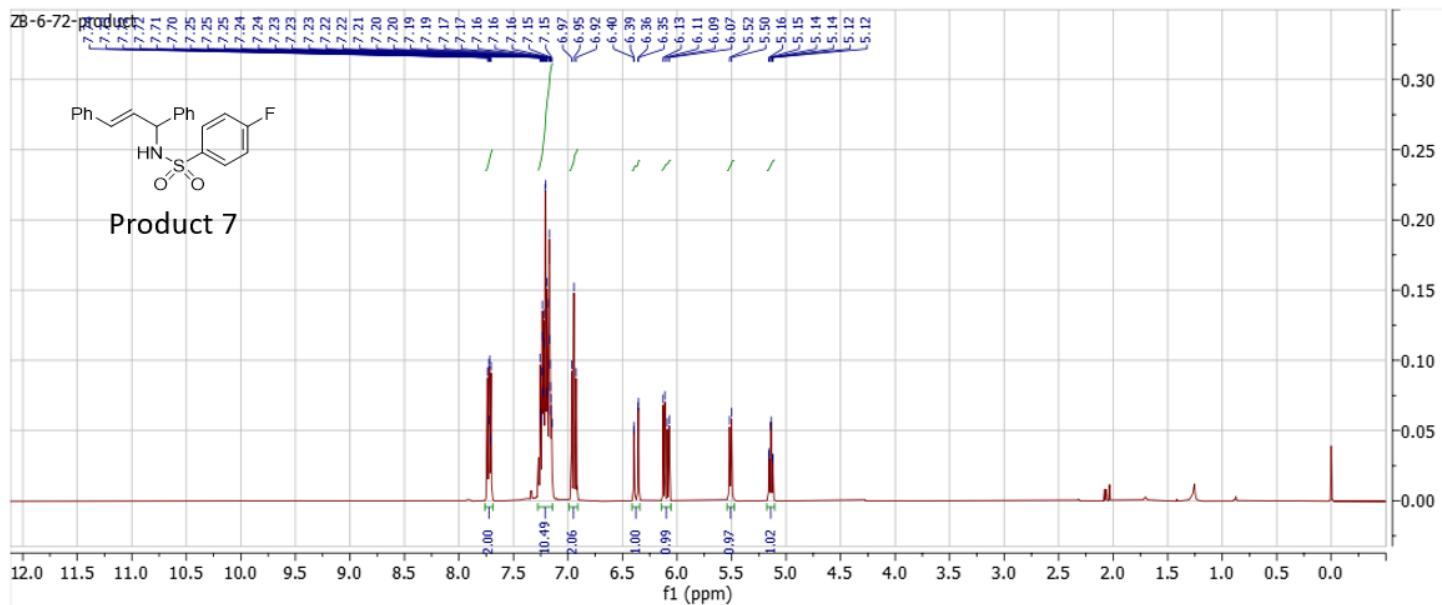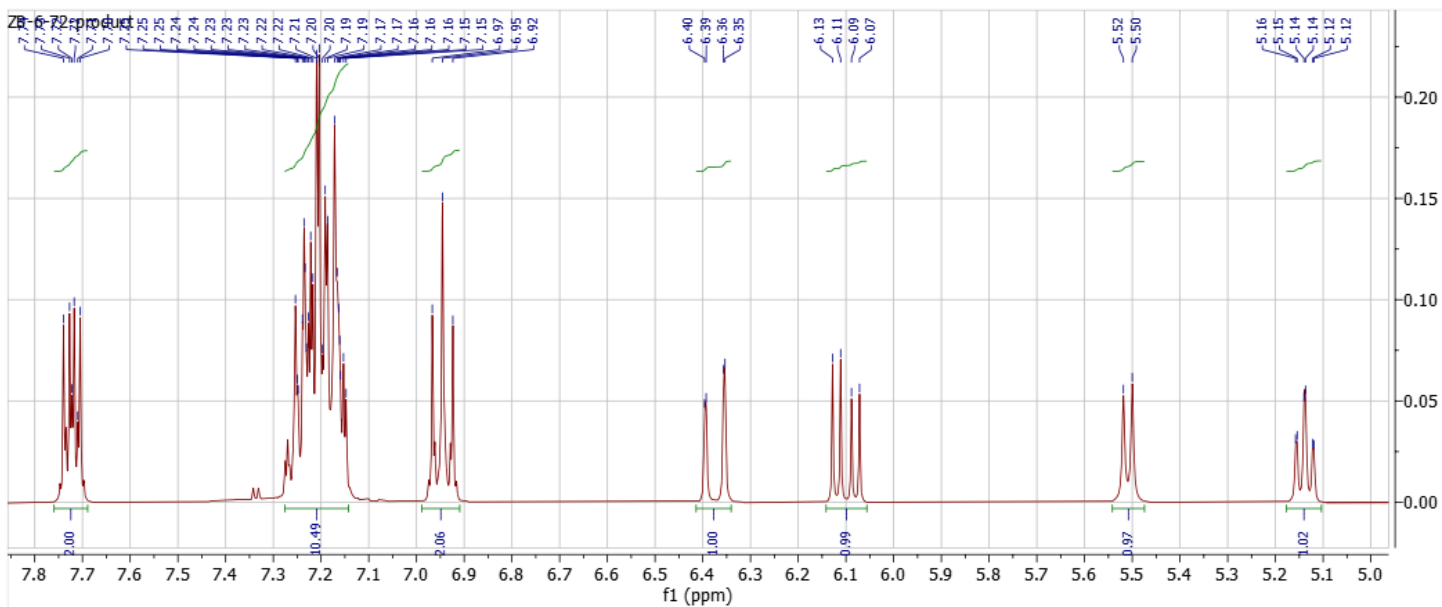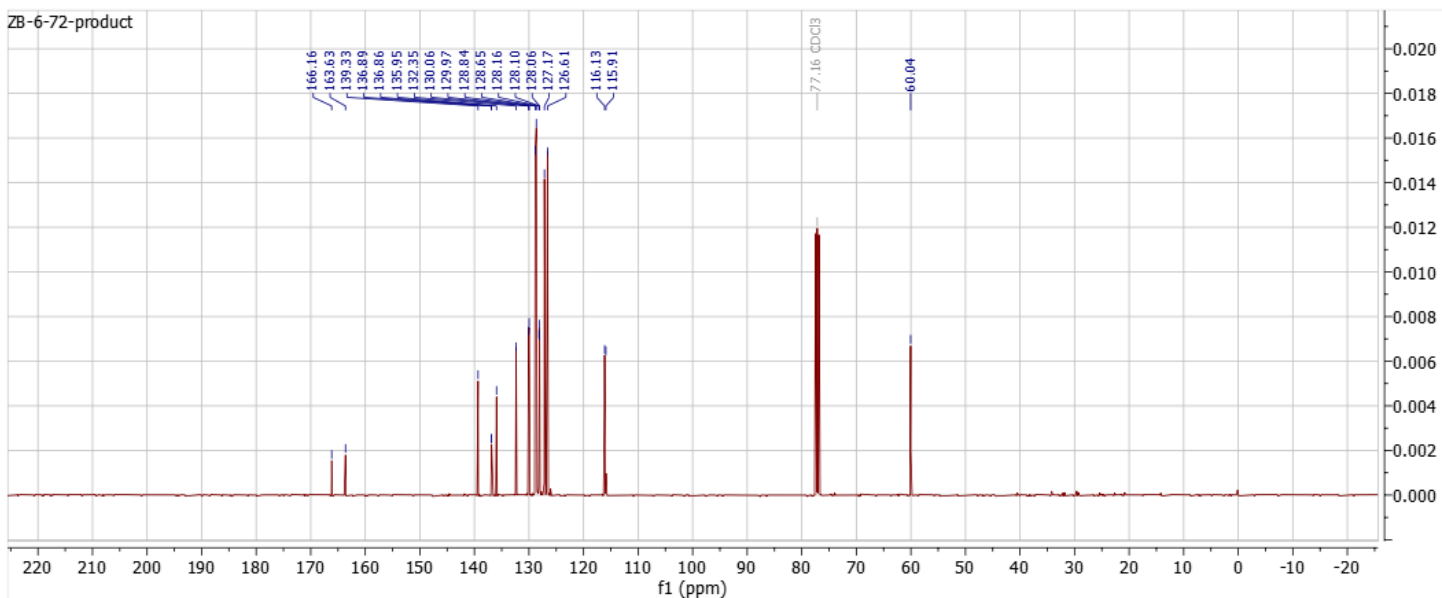

Figure S7. 400 MHz  $^1\text{H}$ -NMR in  $\text{CDCl}_3$  (full and zoom-in of aromatic region) and 101 MHz  $^{13}\text{C}\{^1\text{H}\}$  NMR in  $\text{CDCl}_3$  of Product 7.

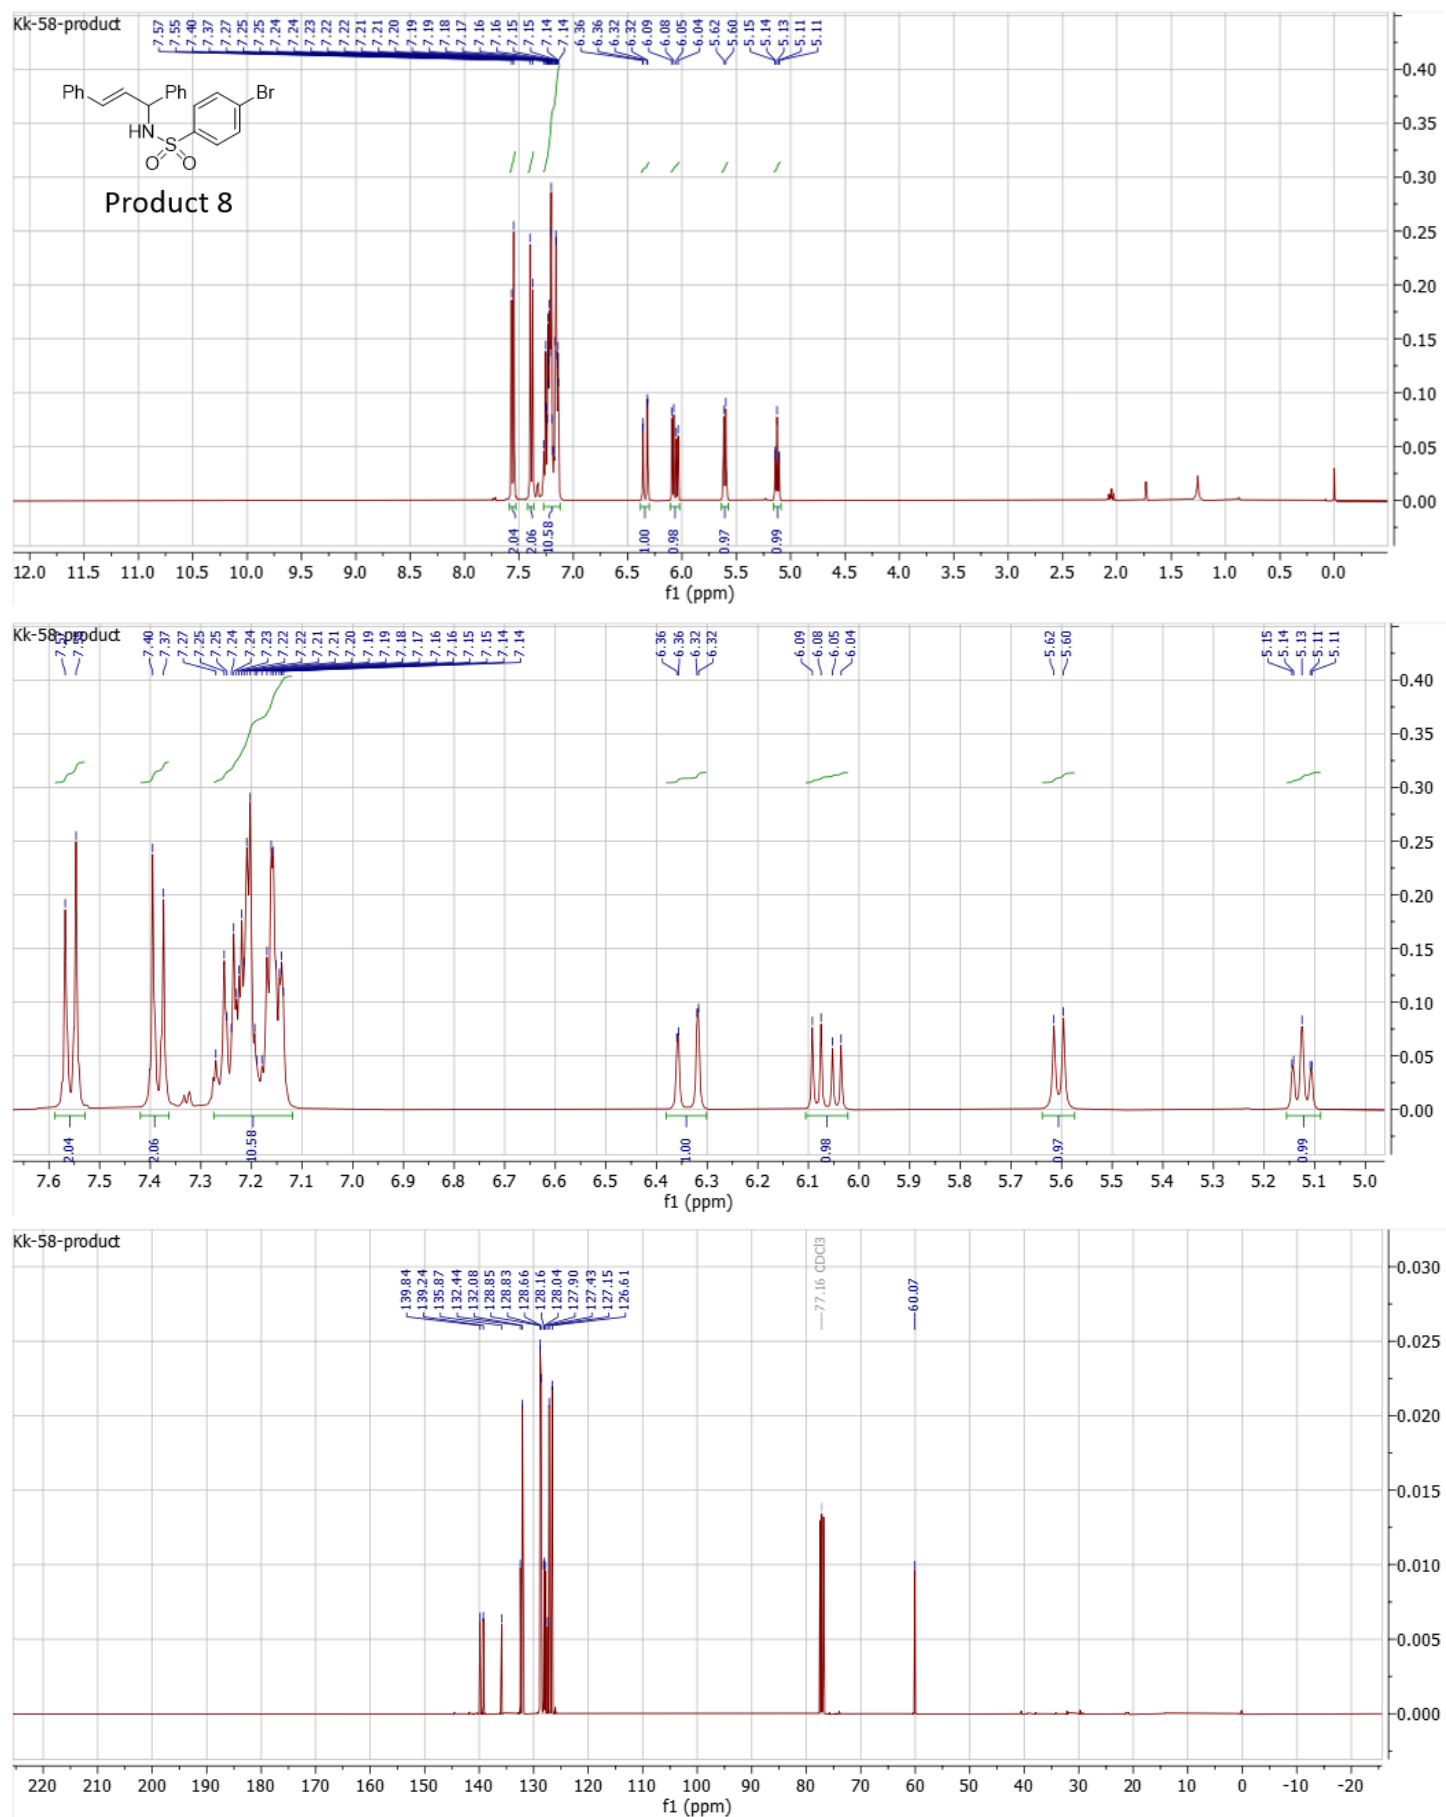

**Figure S8.** 400 MHz  $^1\text{H-NMR}$  in  $\text{CDCl}_3$  (full and zoom-in of aromatic region) and 101 MHz  $^{13}\text{C}\{^1\text{H}\}$  NMR in  $\text{CDCl}_3$  of Product 8.

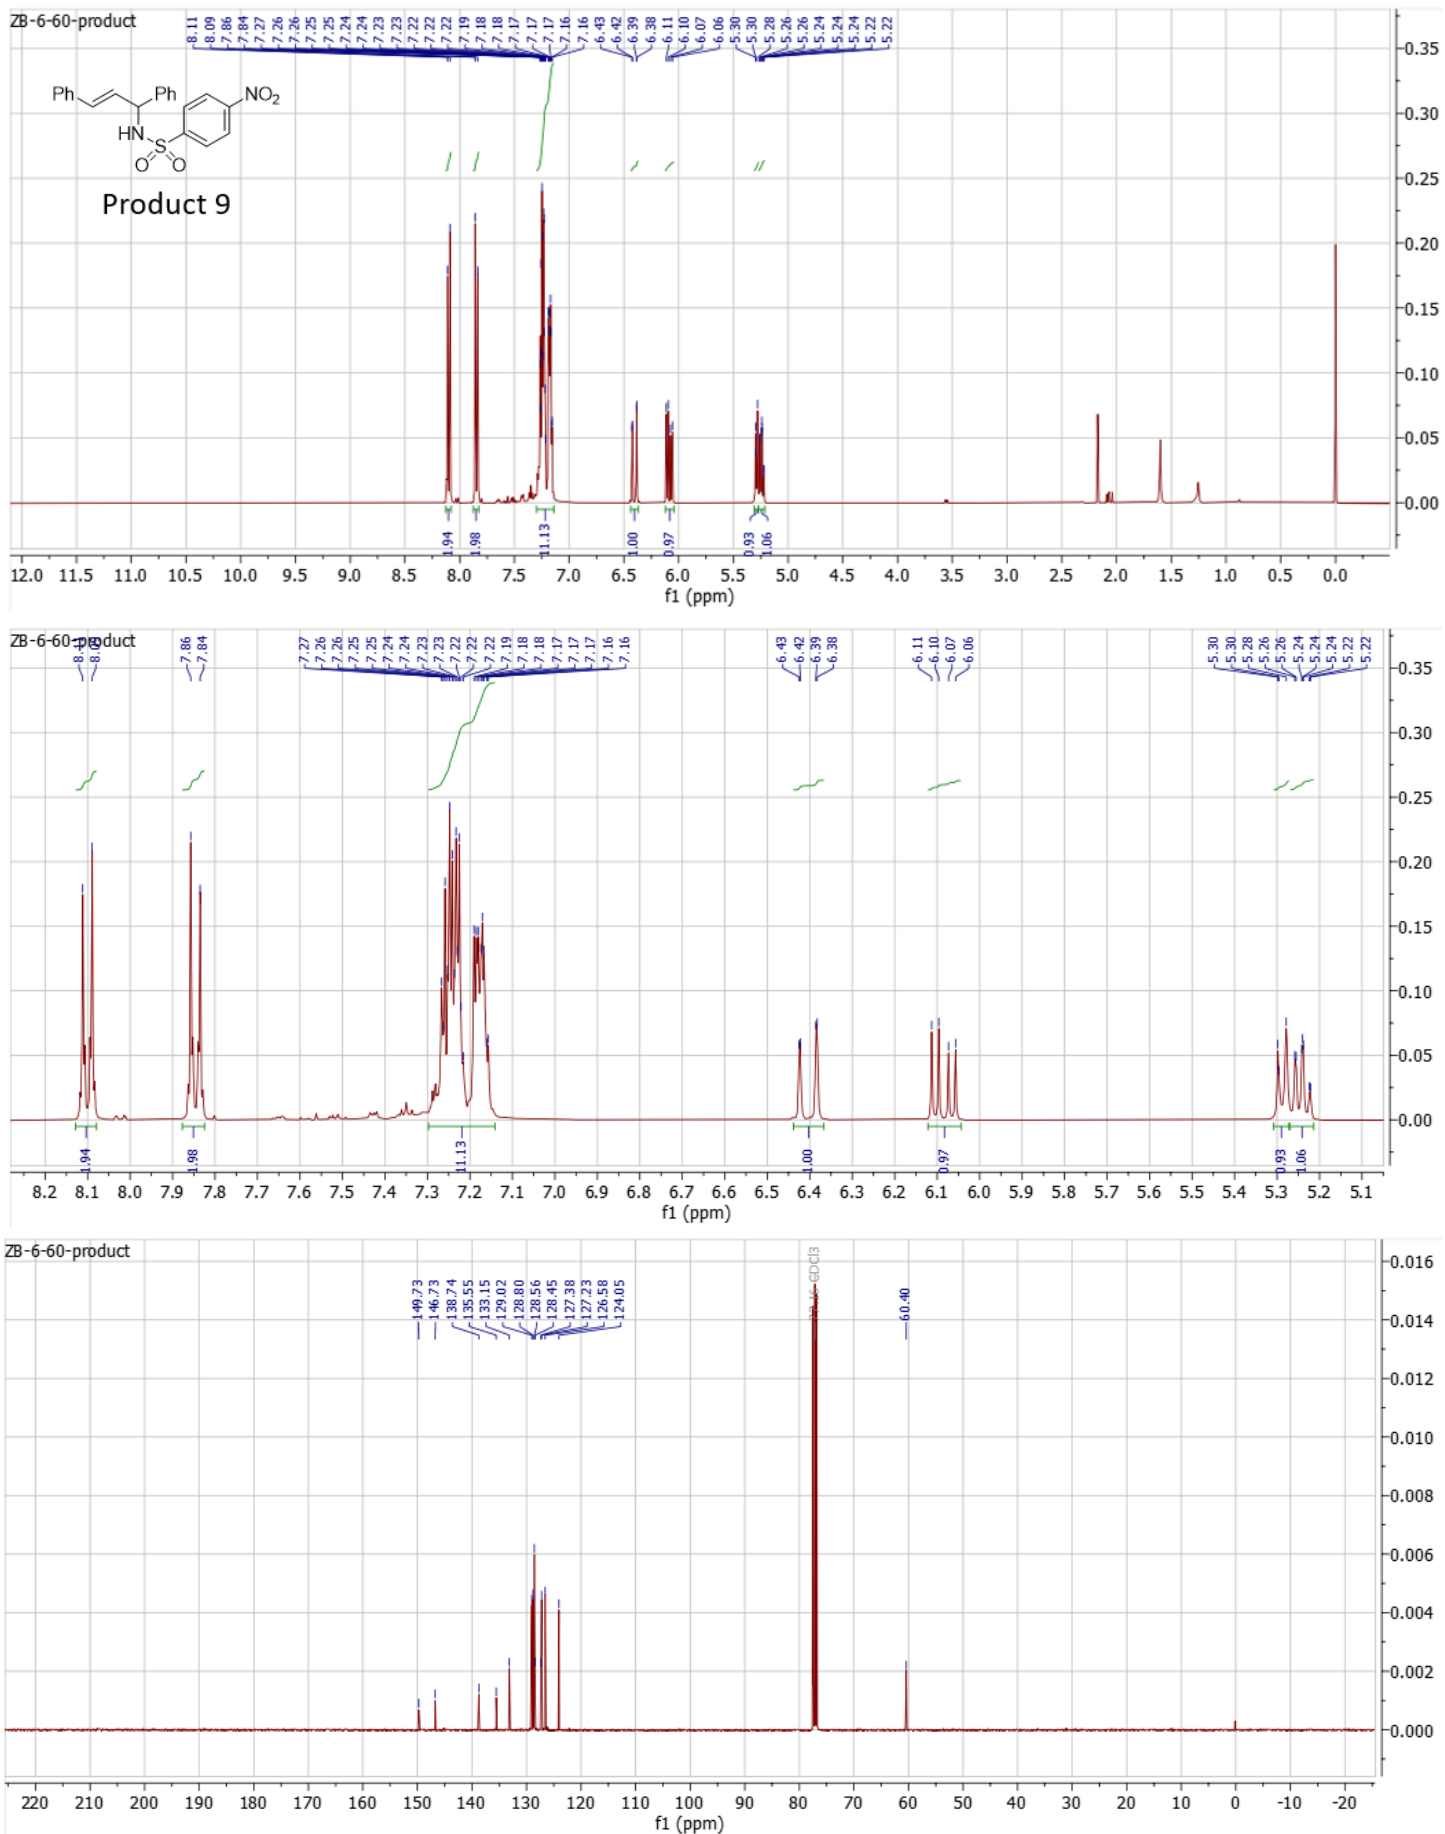

Figure S9. 400 MHz  $^1\text{H-NMR}$  in  $\text{CDCl}_3$  (full and zoom-in of aromatic region) and 101 MHz  $^{13}\text{C}\{^1\text{H}\}$  NMR in  $\text{CDCl}_3$  of Product 9.





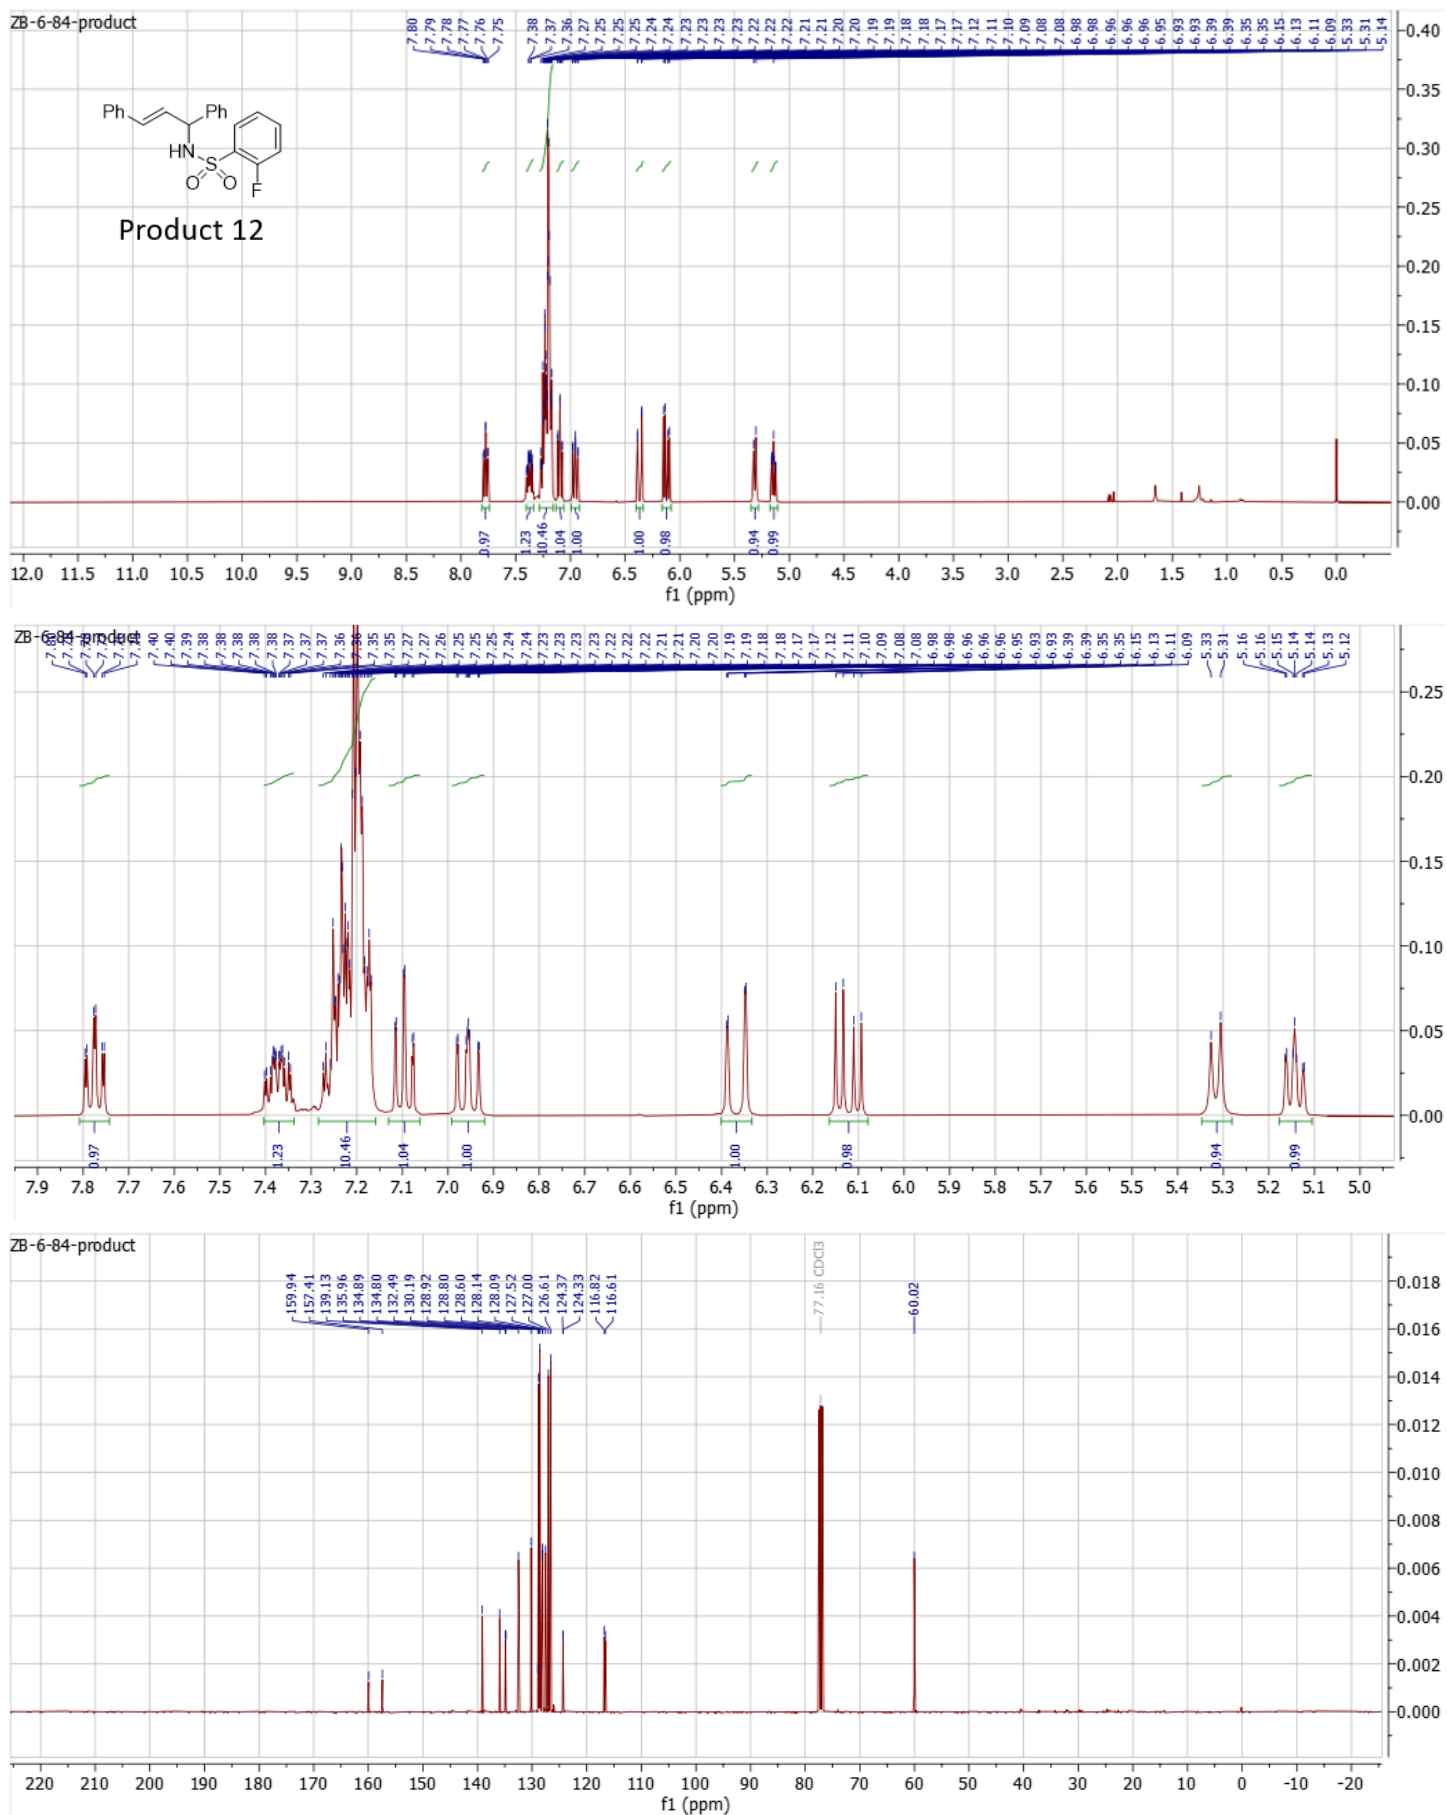

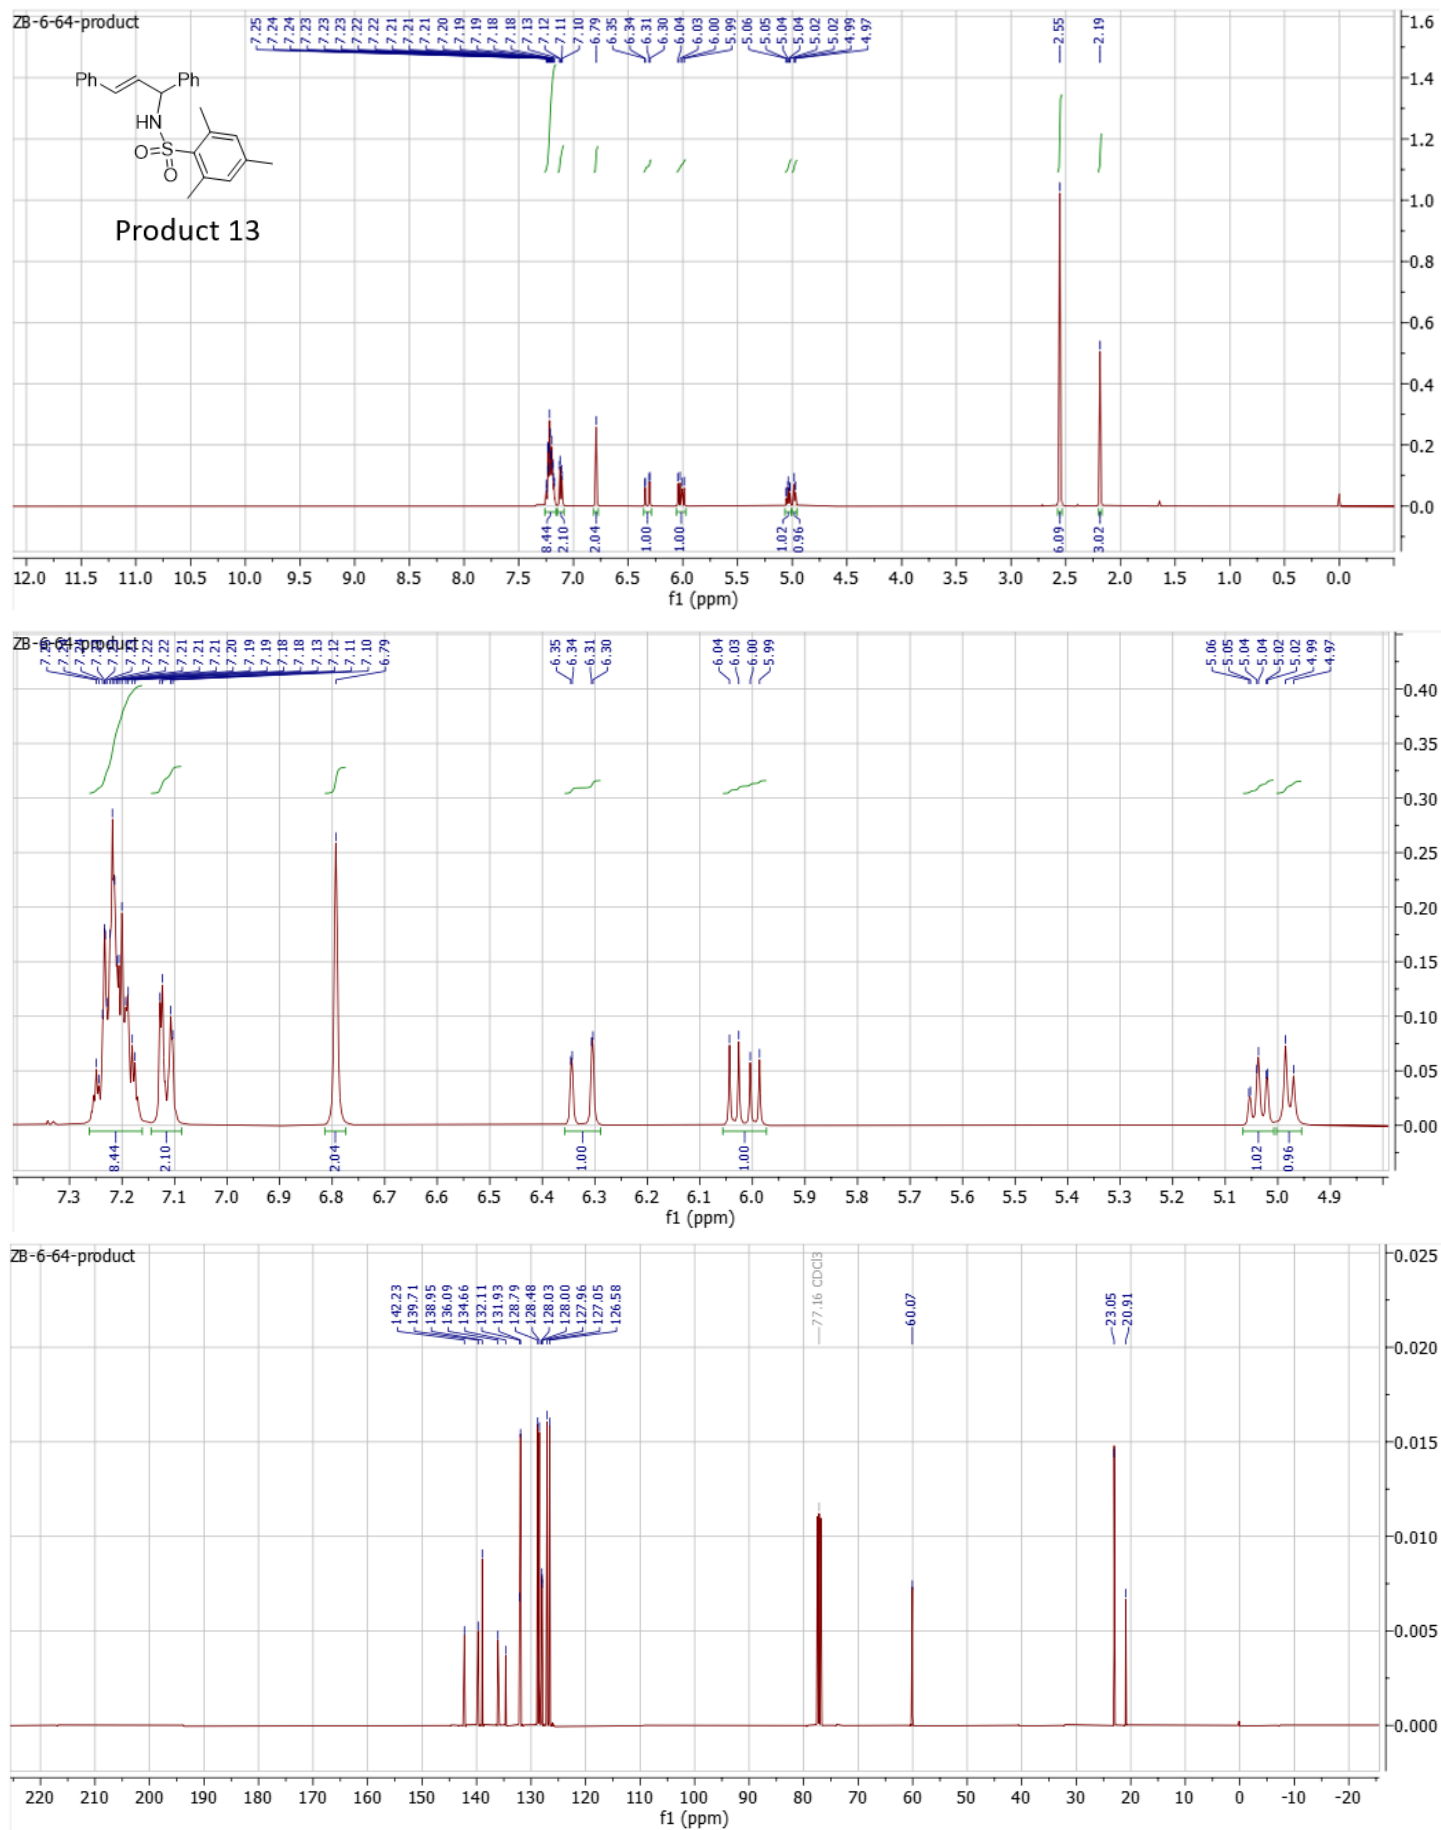

**Figure S13.** 400 MHz <sup>1</sup>H-NMR in CDCl<sub>3</sub> (full and zoom-in of aromatic region) and 101 MHz <sup>13</sup>C{<sup>1</sup>H} NMR in CDCl<sub>3</sub> of Product **13**.

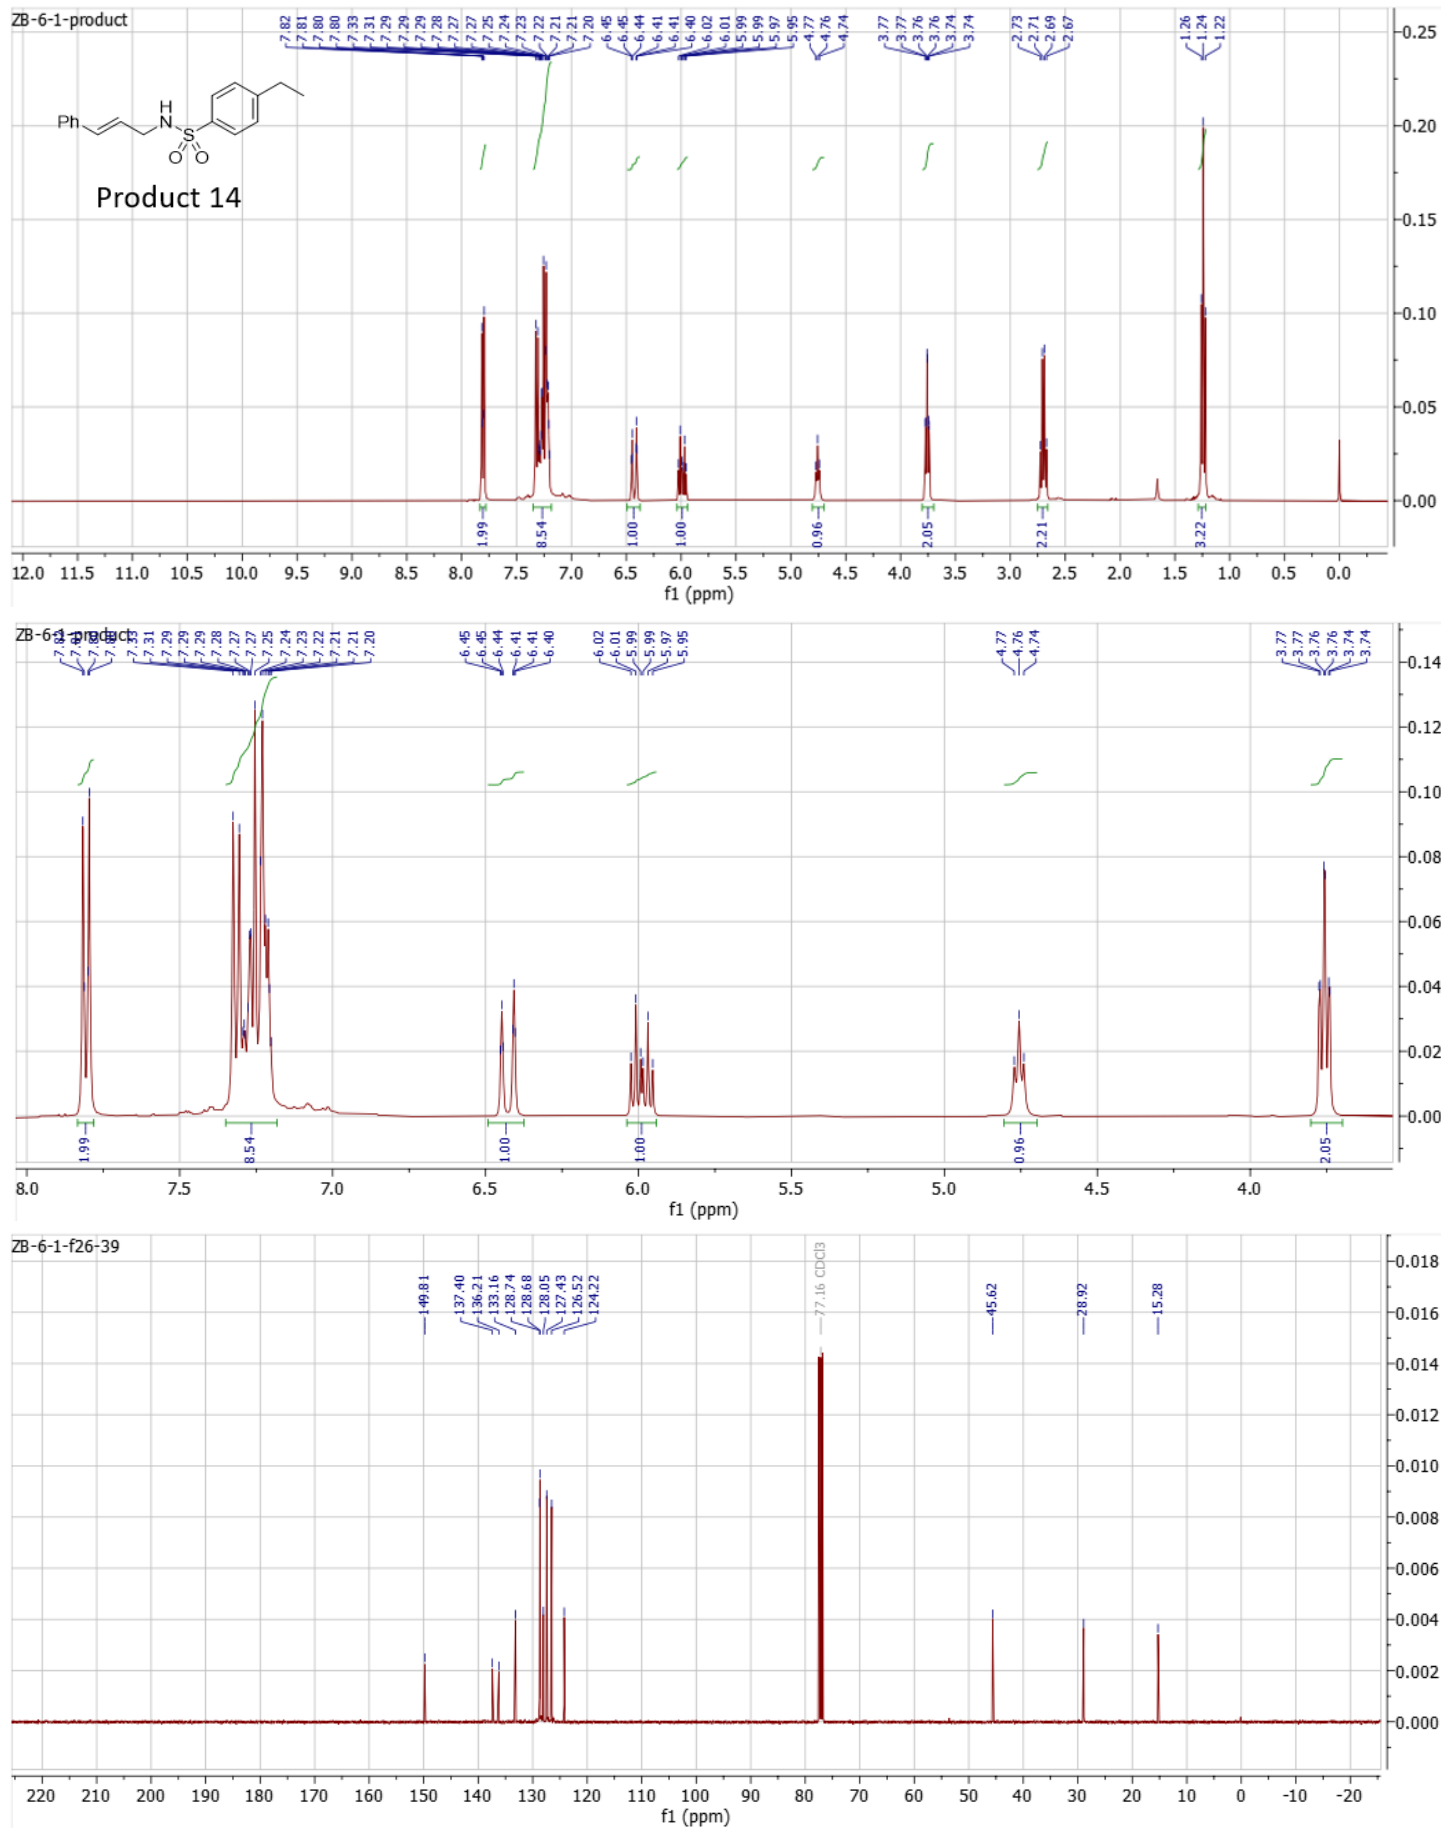

Figure S14. 400 MHz  $^1\text{H-NMR}$  in  $\text{CDCl}_3$  (full and zoom-in of aromatic region) and 101 MHz  $^{13}\text{C}\{^1\text{H}\}$  NMR in  $\text{CDCl}_3$  of Product 14.

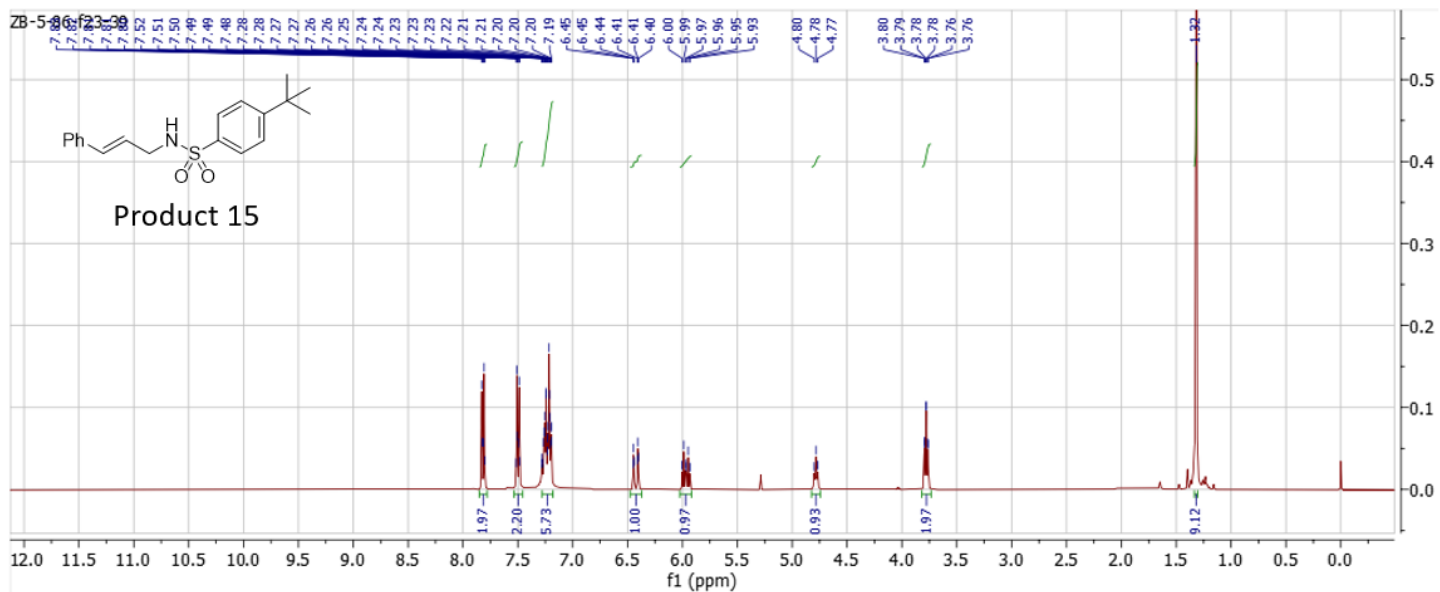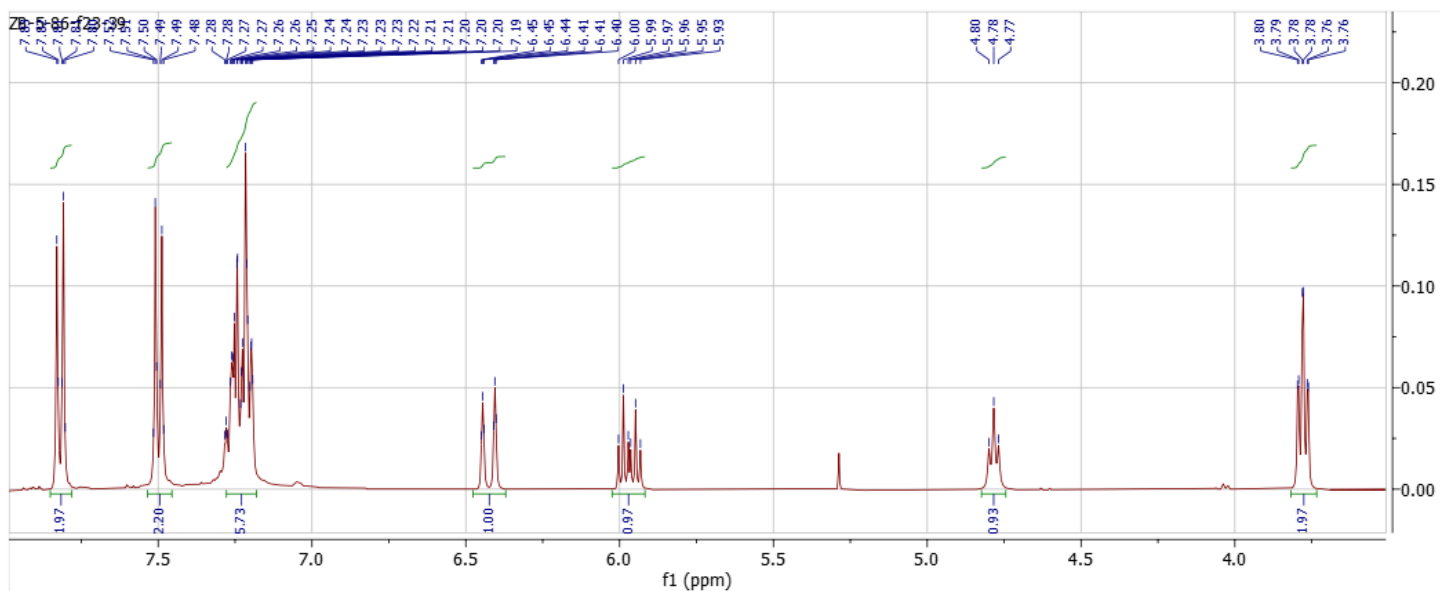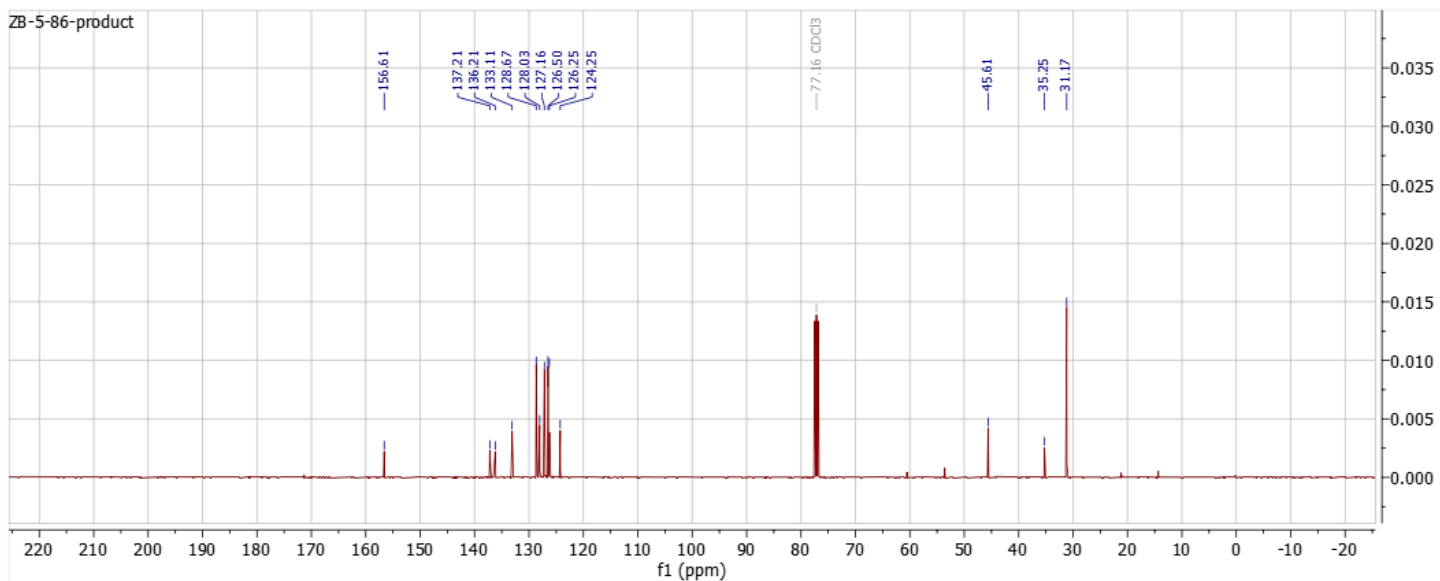

Figure S15. 400 MHz  $^1\text{H}$ -NMR in  $\text{CDCl}_3$  (full and zoom-in of aromatic region) and 101 MHz  $^{13}\text{C}\{^1\text{H}\}$  NMR in  $\text{CDCl}_3$  of Product 15.

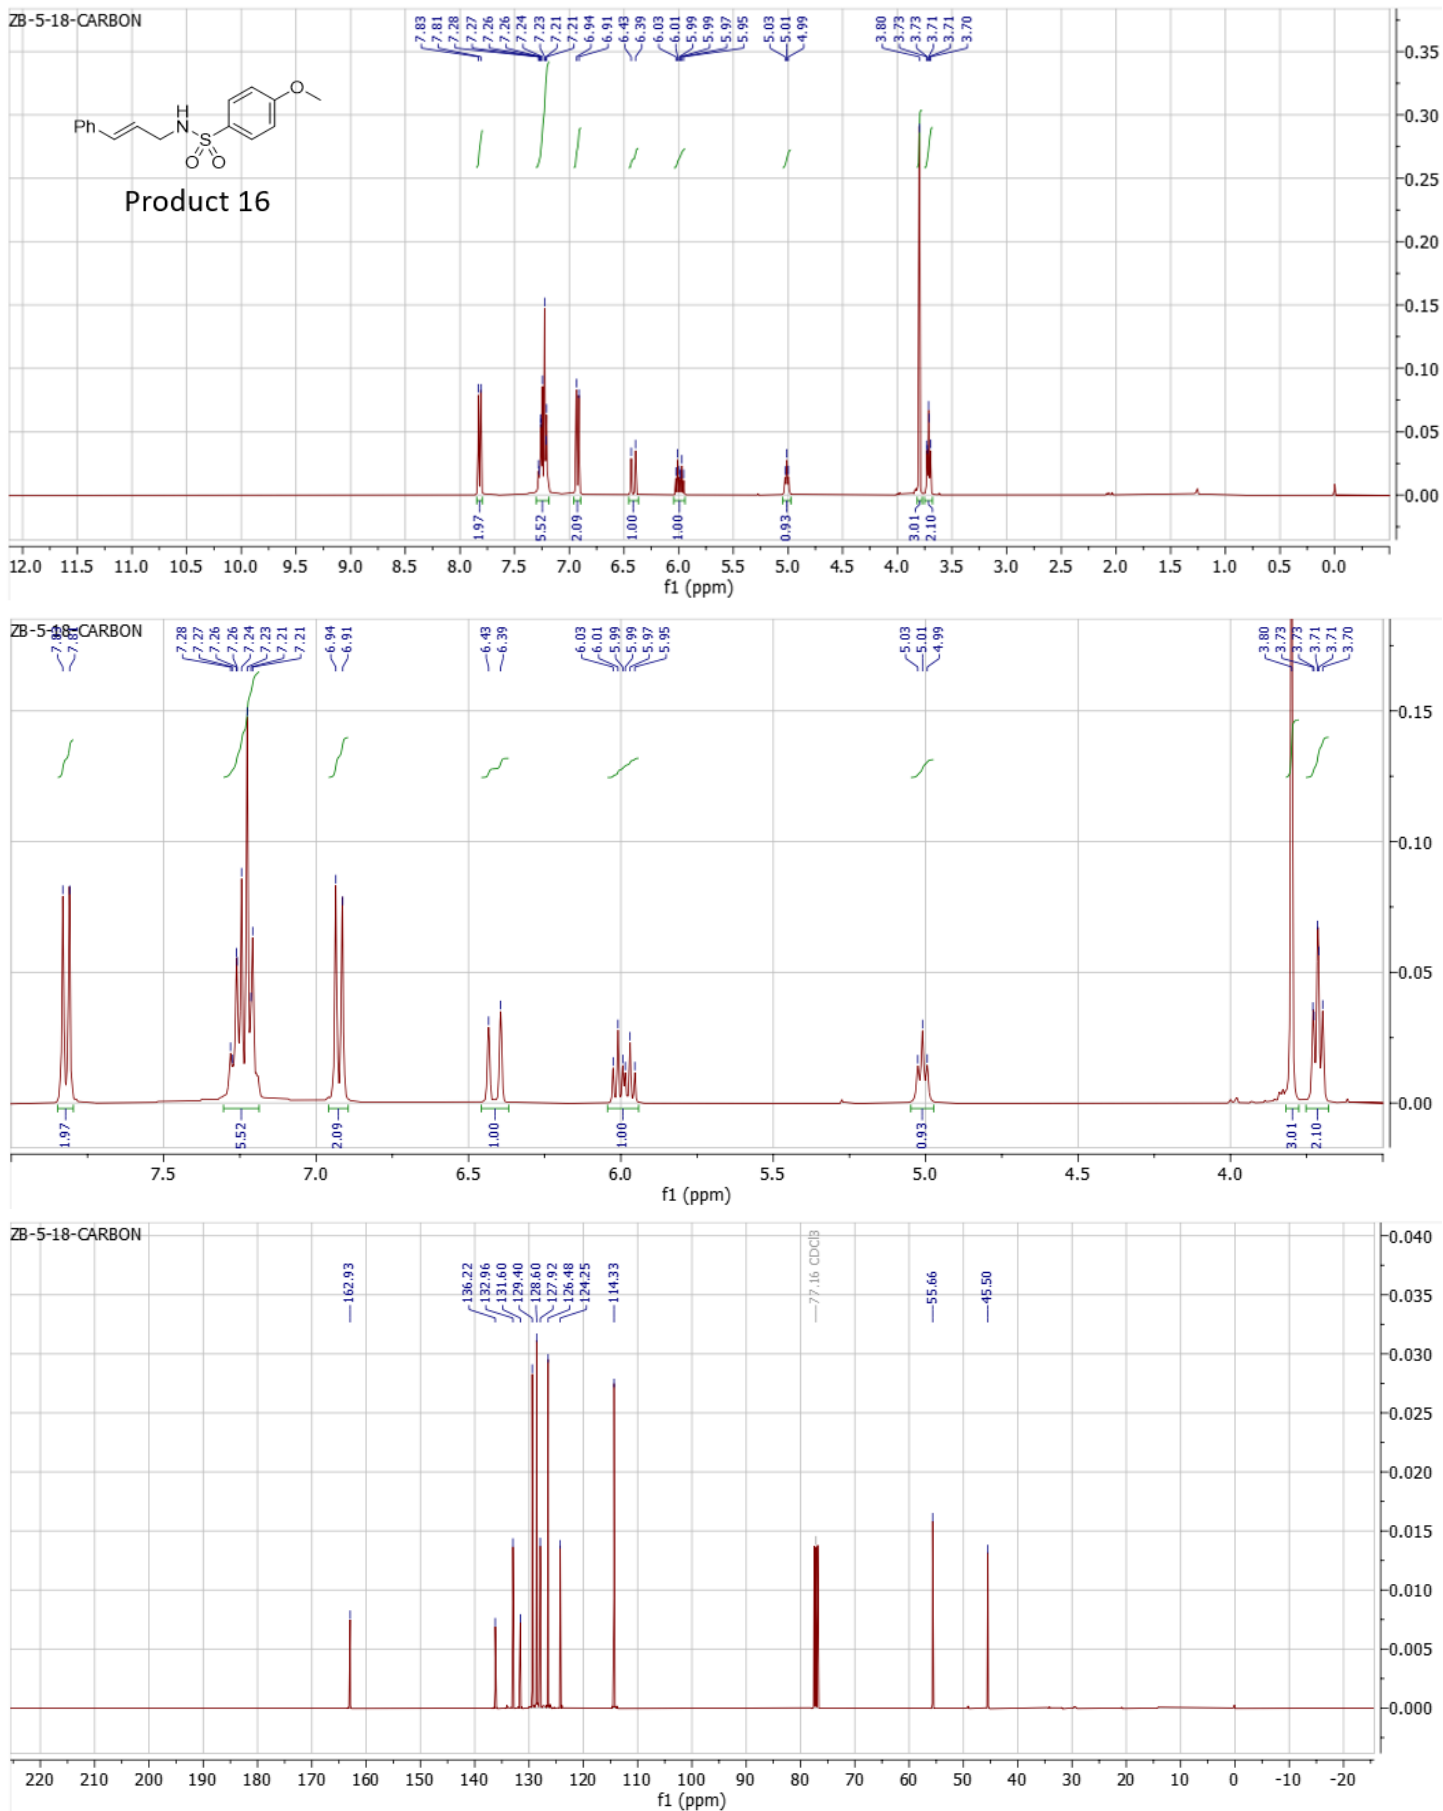

**Figure S16.** 400 MHz  $^1\text{H-NMR}$  in  $\text{CDCl}_3$  (full and zoom-in of aromatic region) and 101 MHz  $^{13}\text{C}\{^1\text{H}\}$  NMR in  $\text{CDCl}_3$  of Product **16**.

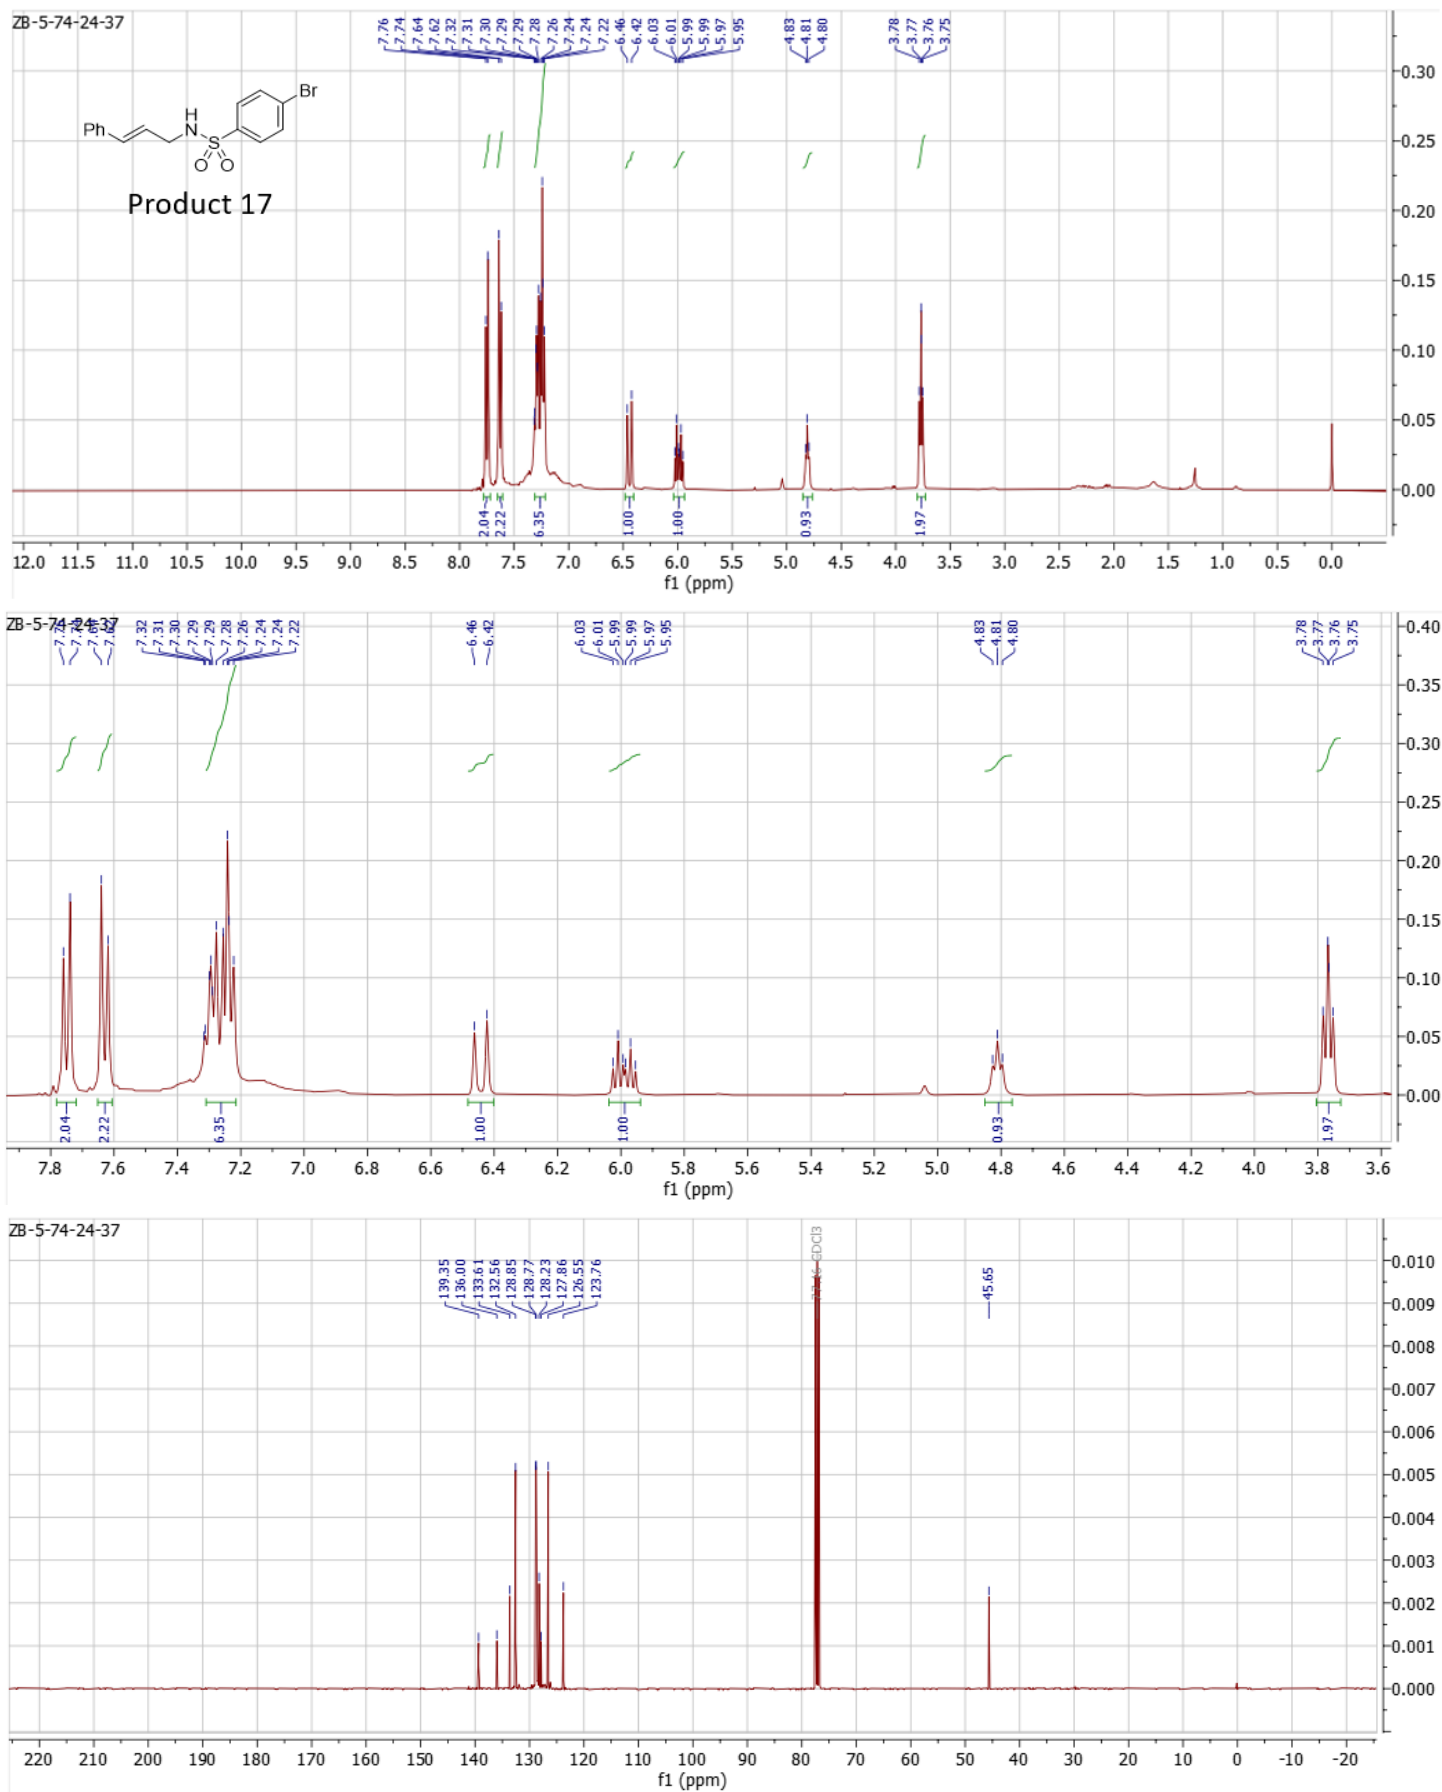

Figure S17. 400 MHz  $^1\text{H}$ -NMR in  $\text{CDCl}_3$  (full and zoom-in of aromatic region) and 101 MHz  $^{13}\text{C}\{^1\text{H}\}$  NMR in  $\text{CDCl}_3$  of Product 17.



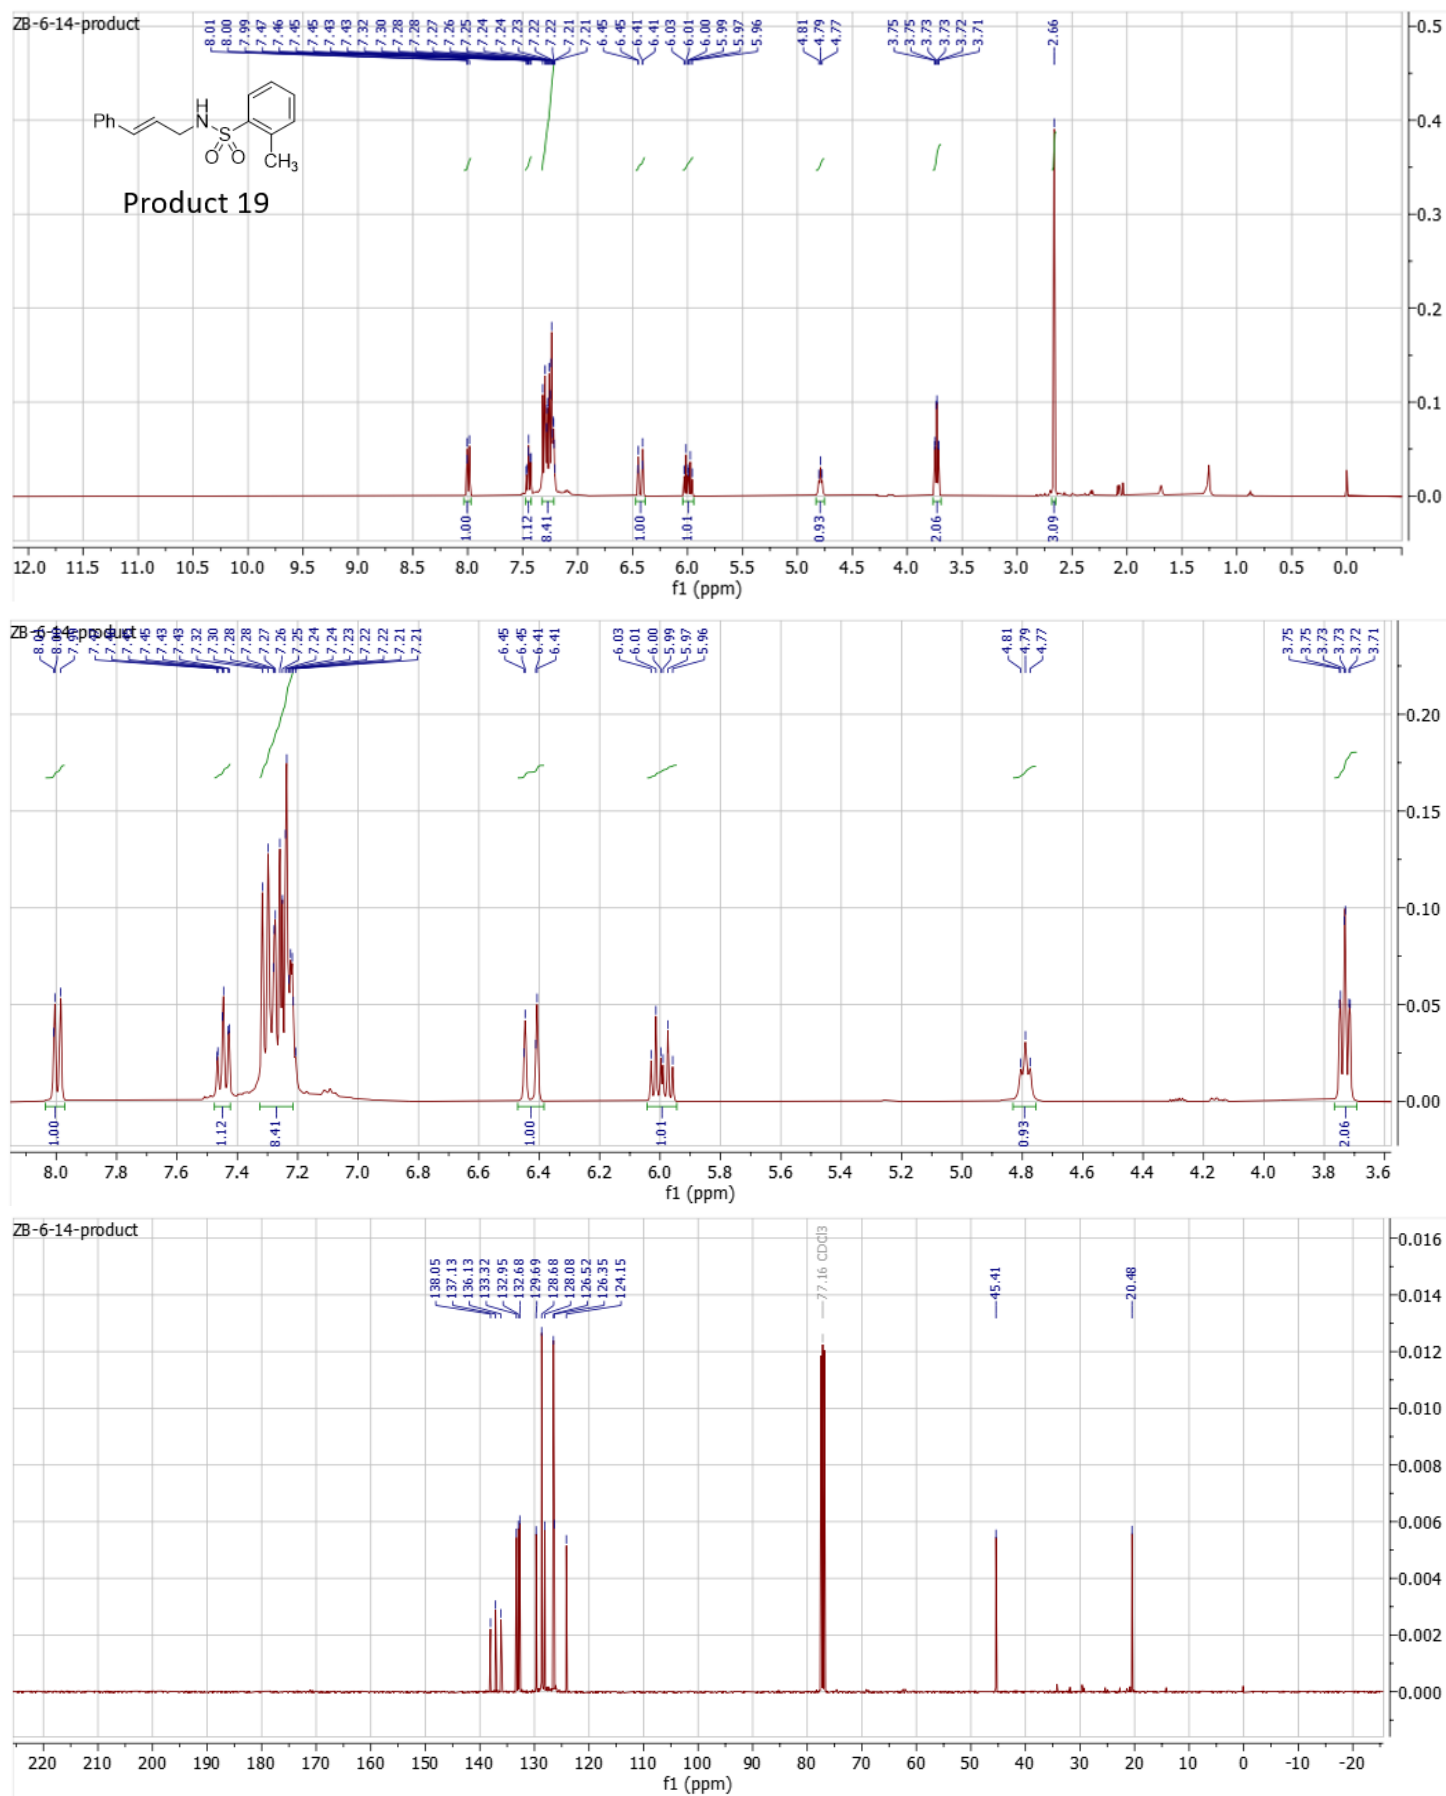

Figure S19. 400 MHz  $^1\text{H-NMR}$  in  $\text{CDCl}_3$  (full and zoom-in of aromatic region) and 101 MHz  $^{13}\text{C}\{^1\text{H}\}$  NMR in  $\text{CDCl}_3$  of Product 19.

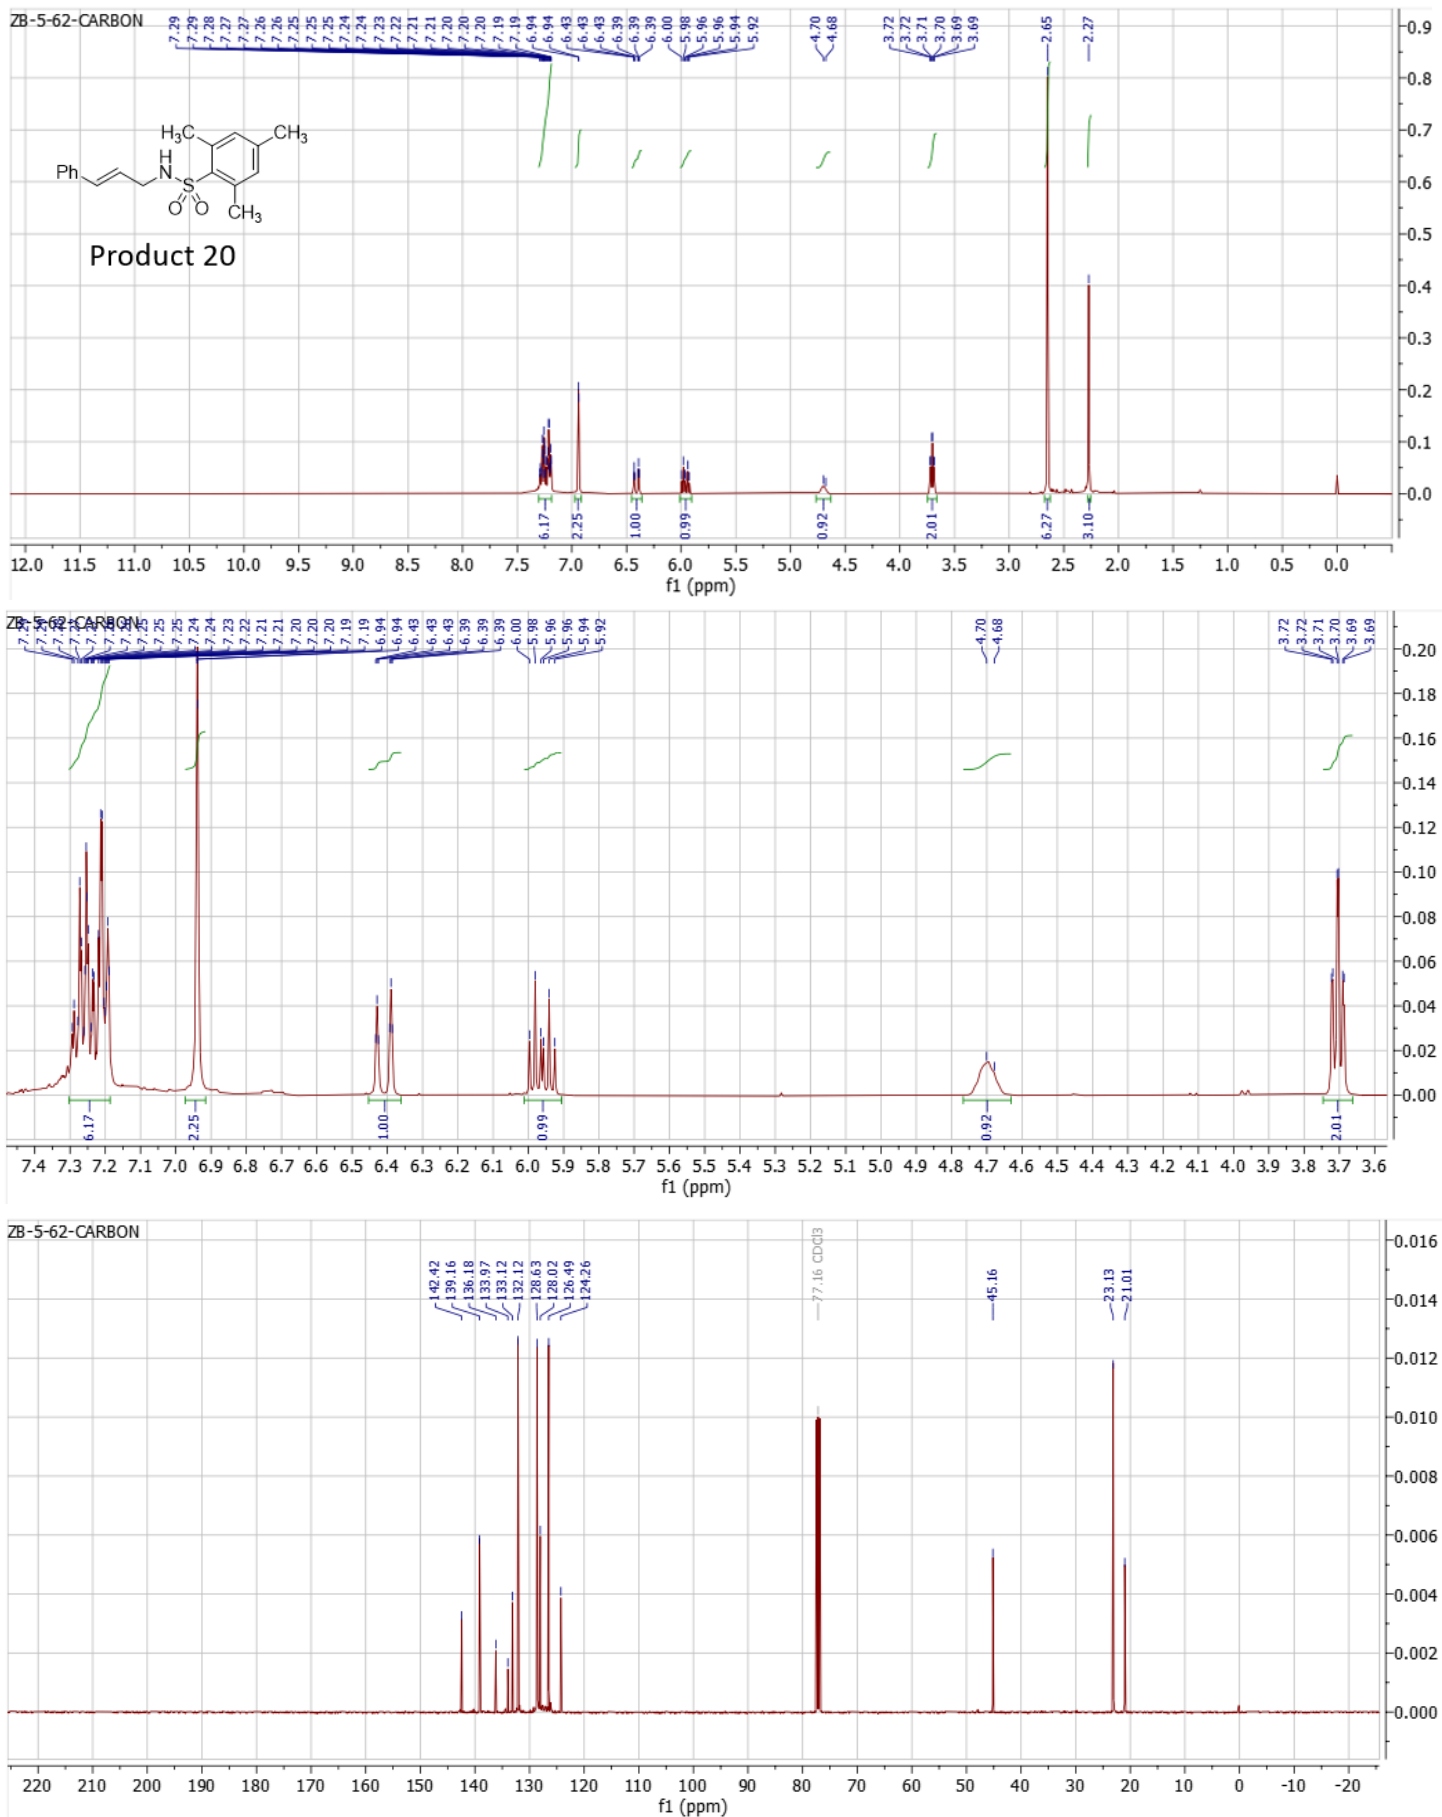

Figure S20. 400 MHz <sup>1</sup>H-NMR in CDCl<sub>3</sub> (full and zoom-in of aromatic region) and 101 MHz <sup>13</sup>C{<sup>1</sup>H} NMR in CDCl<sub>3</sub> of Product 20.

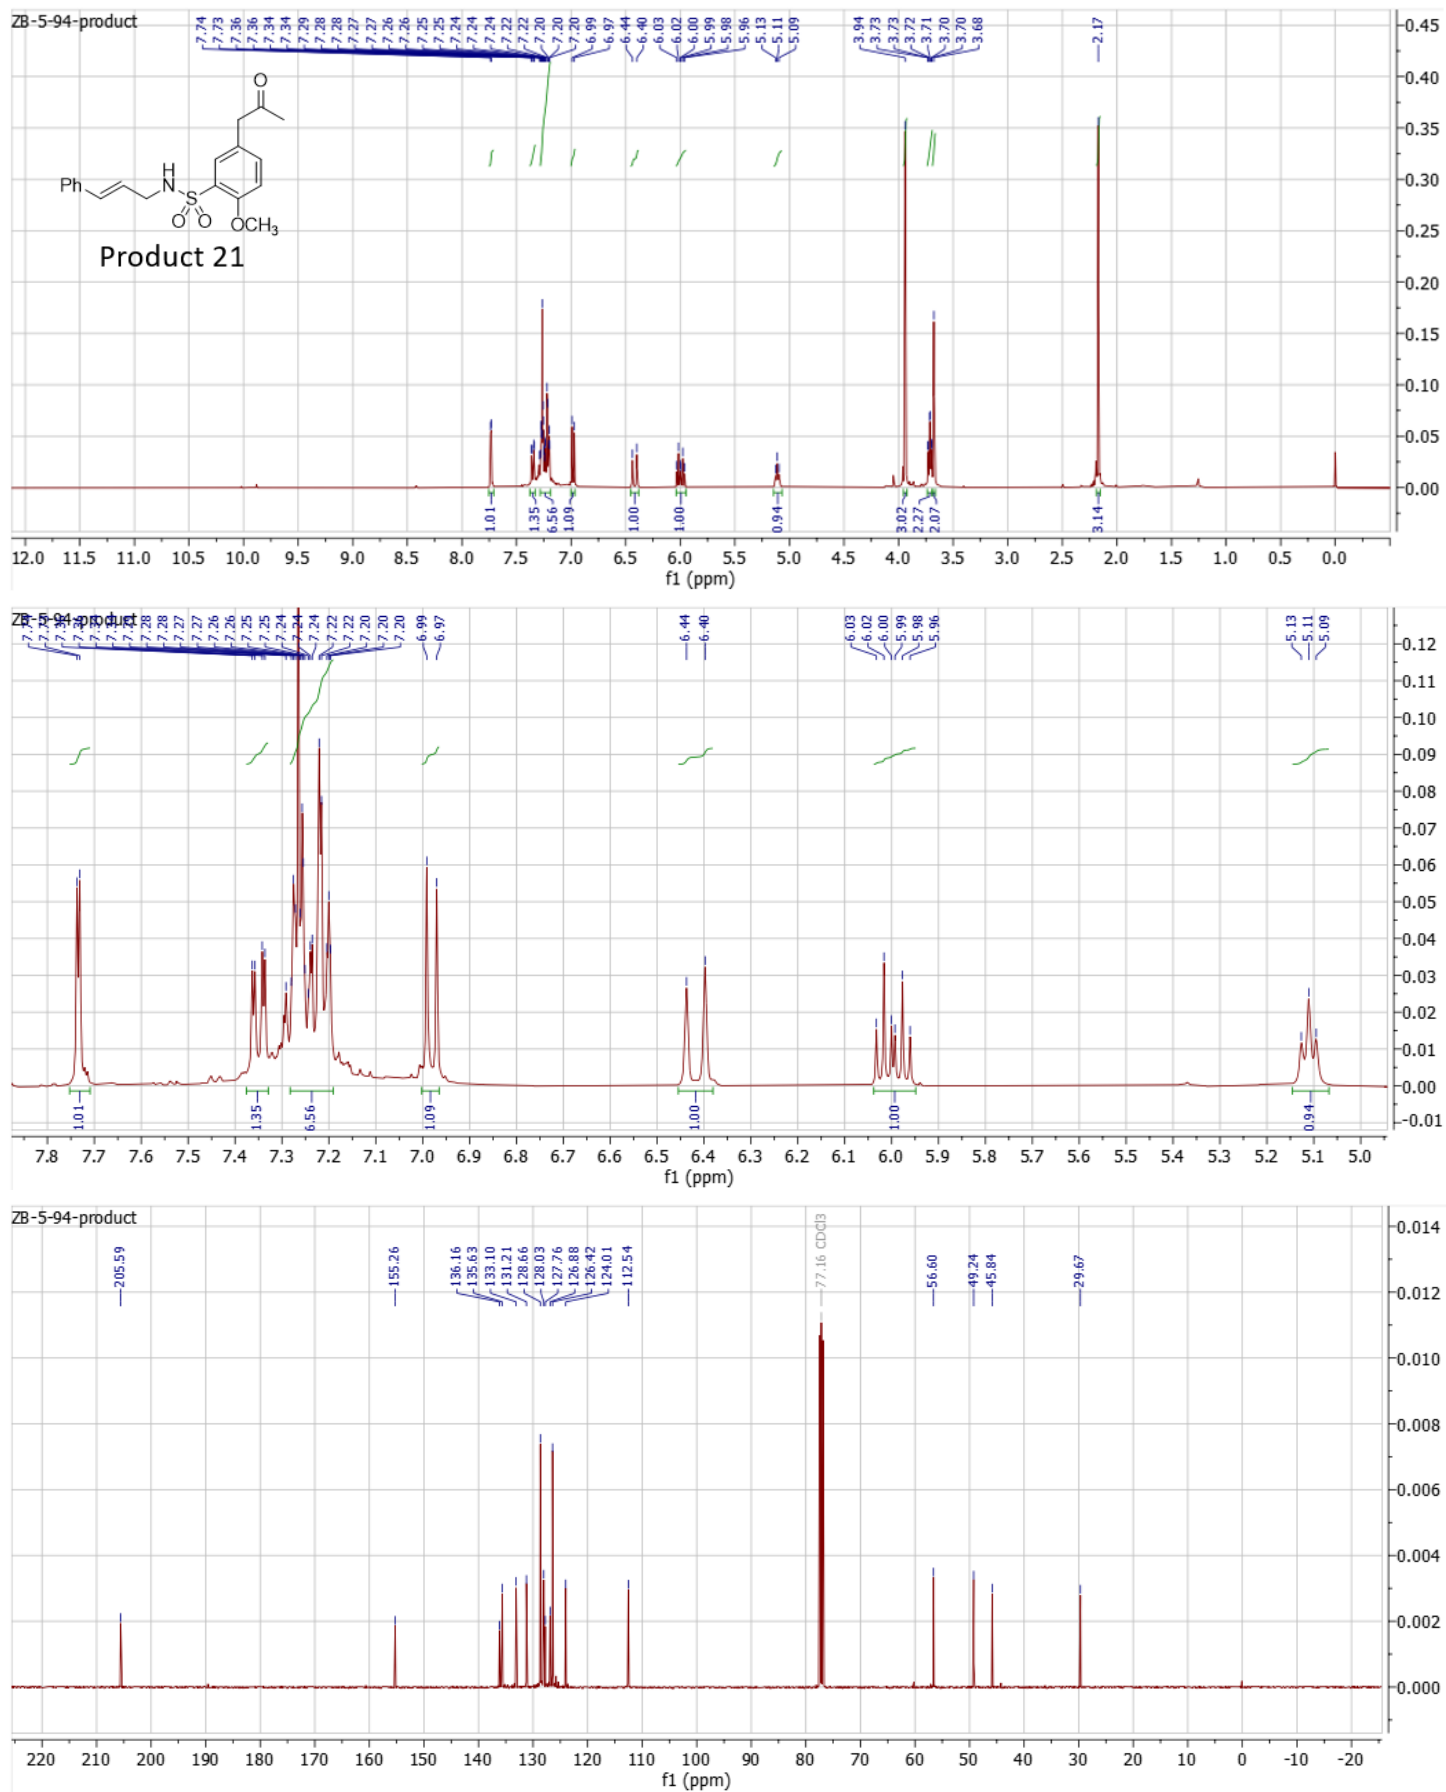

Figure S21. 400 MHz  $^1\text{H-NMR}$  in  $\text{CDCl}_3$  (full and zoom-in of aromatic region) and 101 MHz  $^{13}\text{C}\{^1\text{H}\}$  NMR in  $\text{CDCl}_3$  of Product 21.

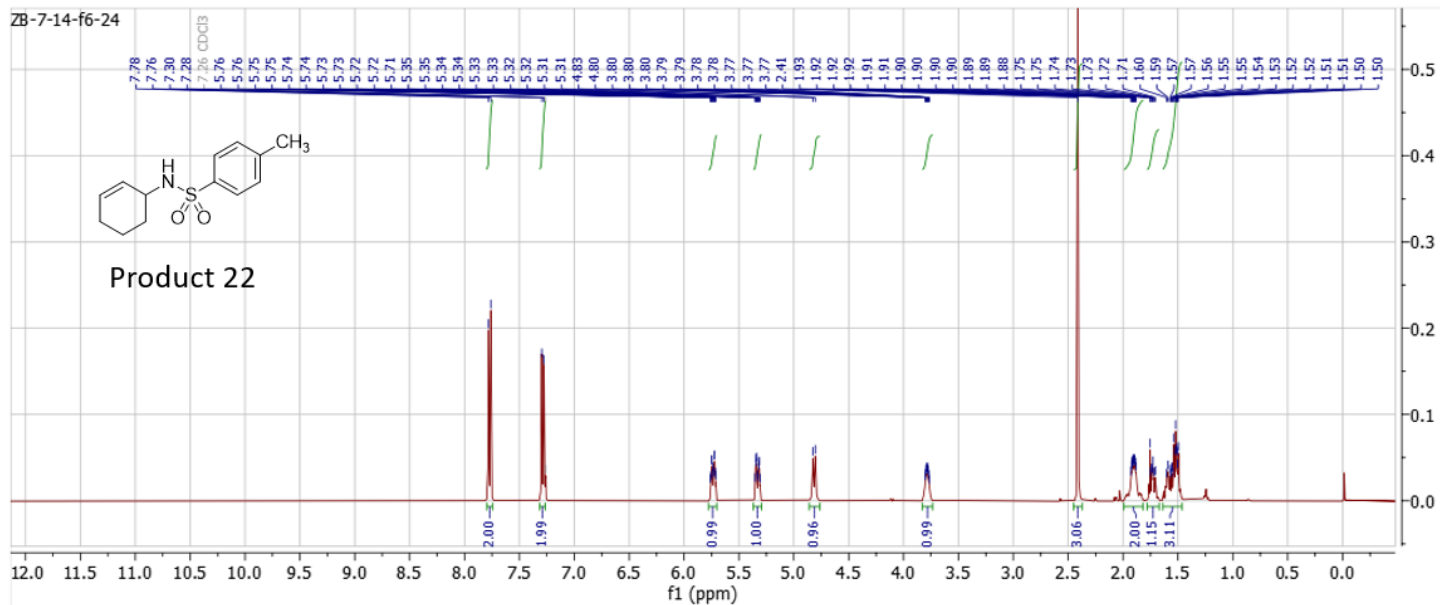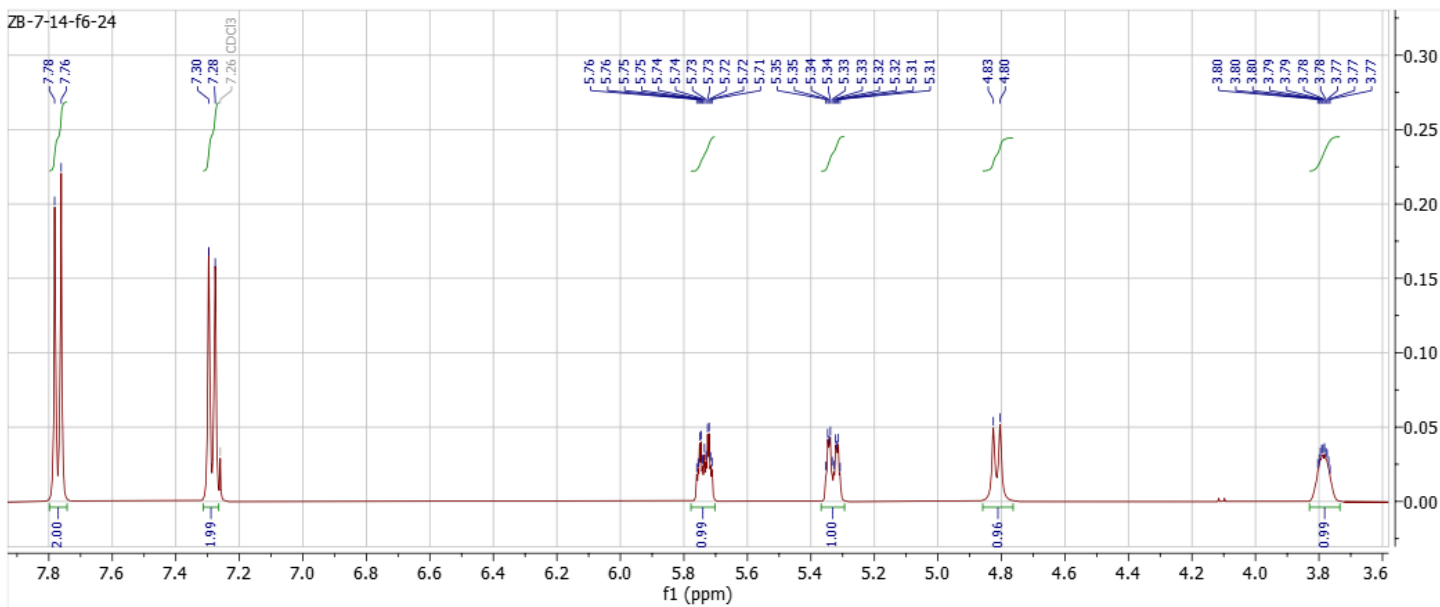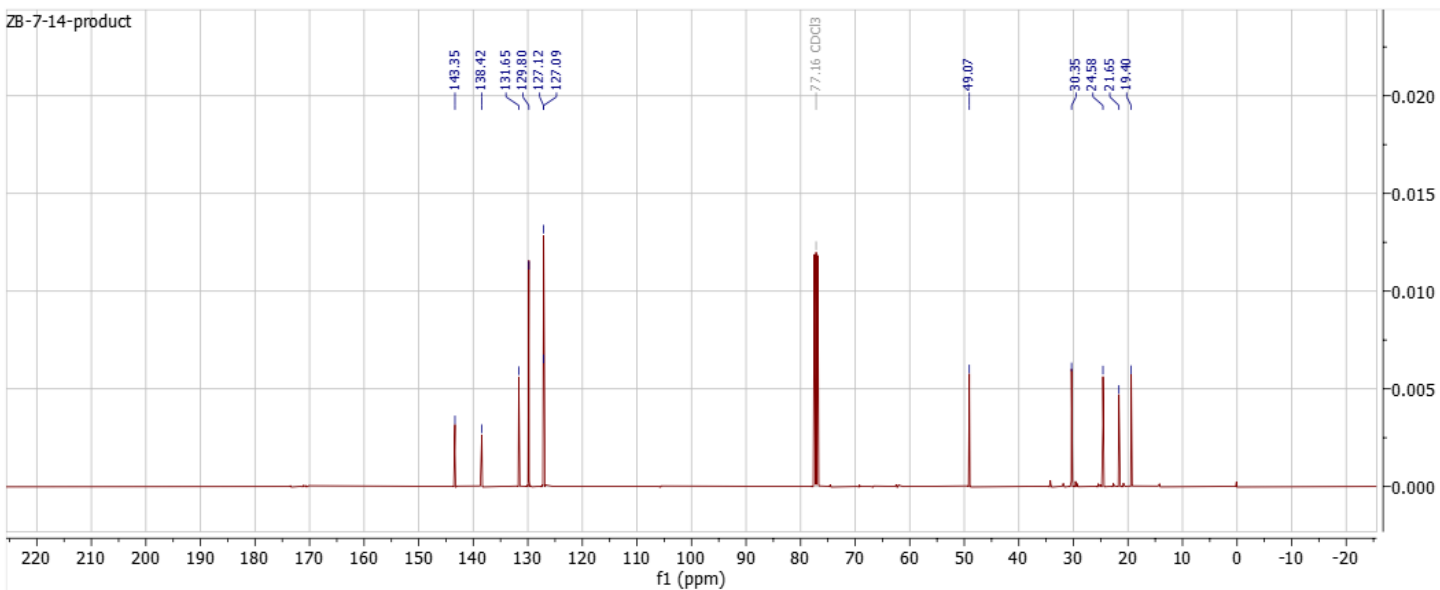

Figure S22. 400 MHz <sup>1</sup>H-NMR in CDCl<sub>3</sub> (full and zoom-in of aromatic region) and 101 MHz <sup>13</sup>C{<sup>1</sup>H} NMR in CDCl<sub>3</sub> of Product 22.





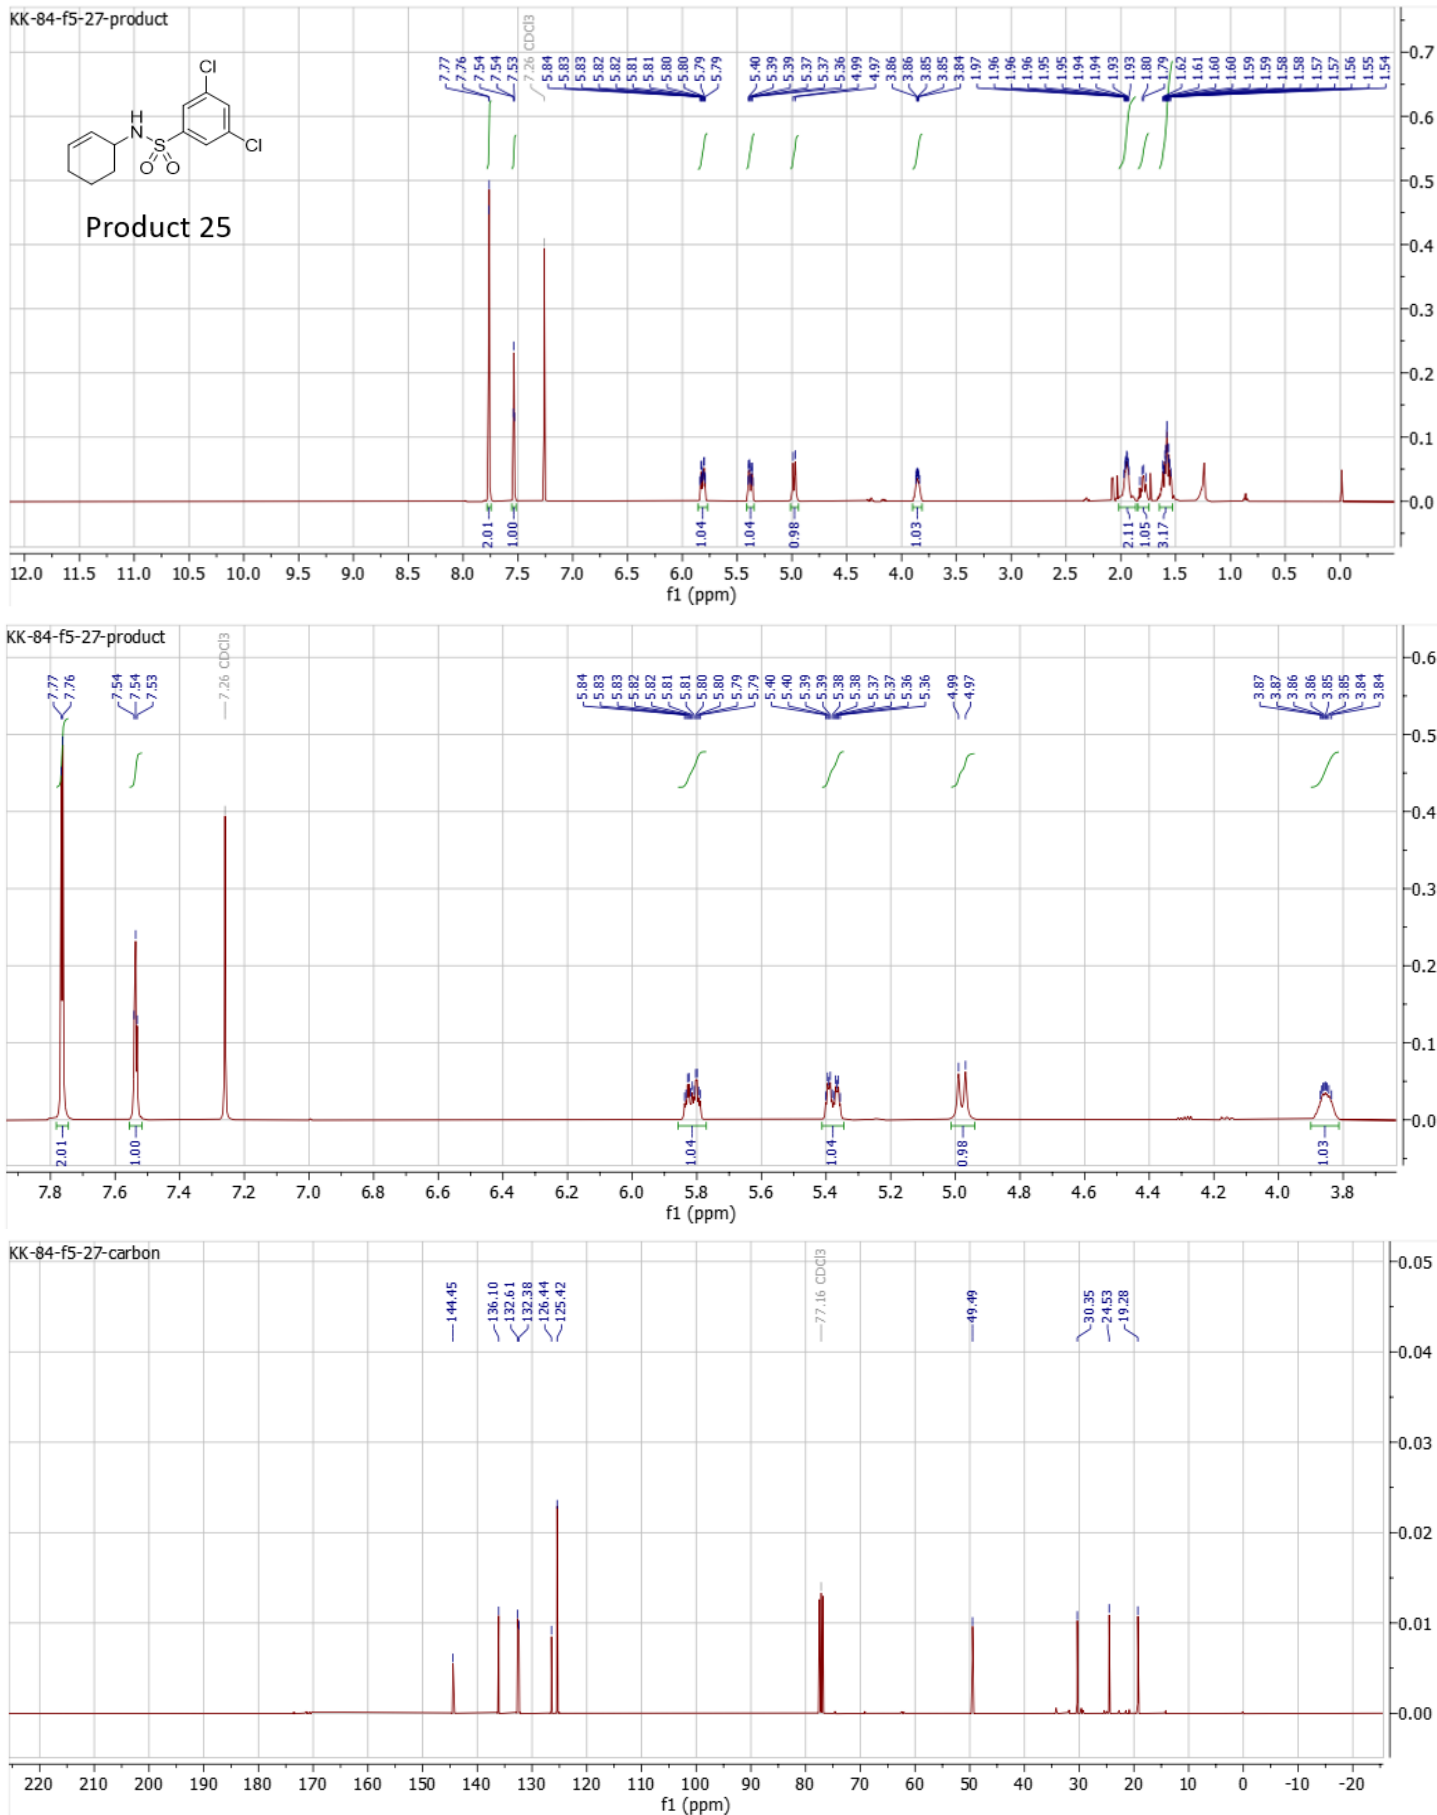

Figure S25. 400 MHz  $^1\text{H-NMR}$  in  $\text{CDCl}_3$  (full and zoom-in of aromatic region) and 101 MHz  $^{13}\text{C}\{^1\text{H}\}$  NMR in  $\text{CDCl}_3$  of Product **25**.

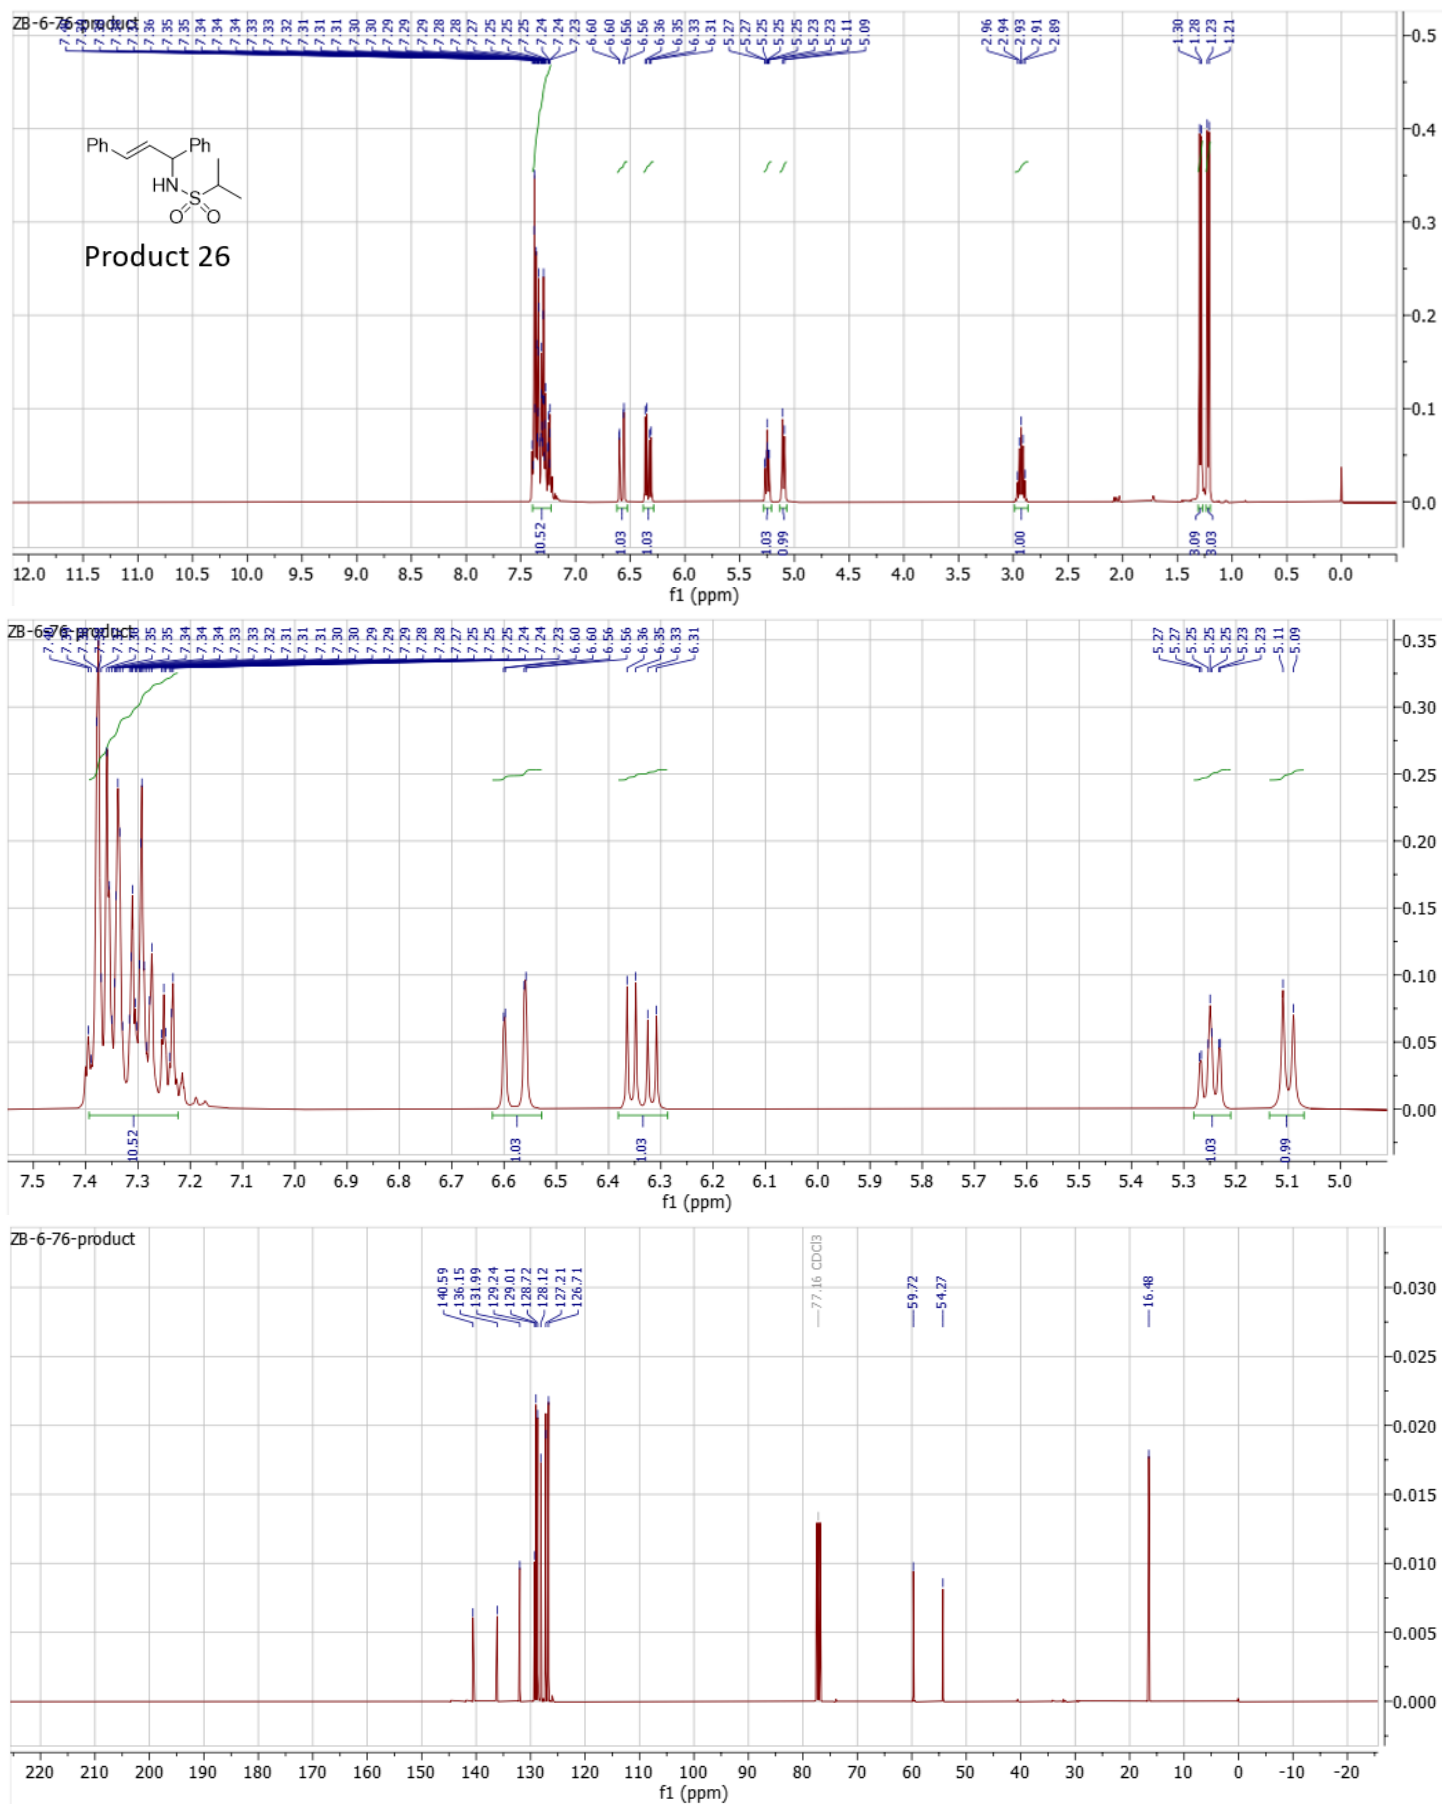

Figure S26. 400 MHz <sup>1</sup>H-NMR in CDCl<sub>3</sub> (full and zoom-in of aromatic region) and 101 MHz <sup>13</sup>C{<sup>1</sup>H} NMR in CDCl<sub>3</sub> of Product **26**.

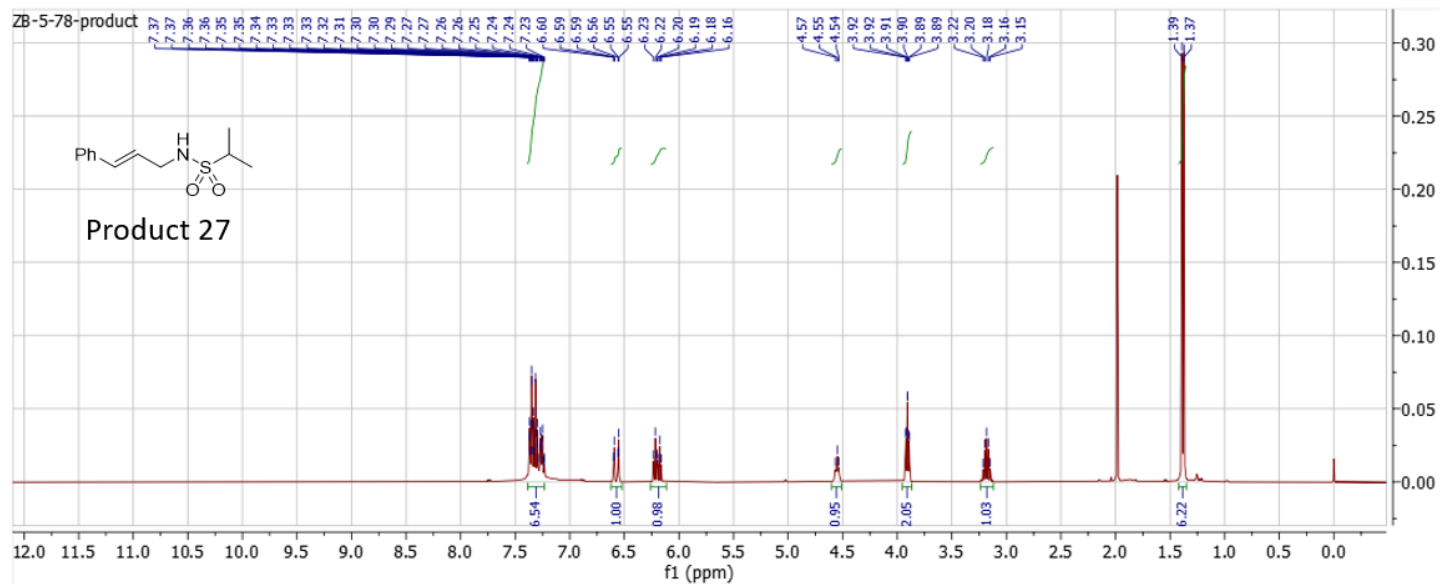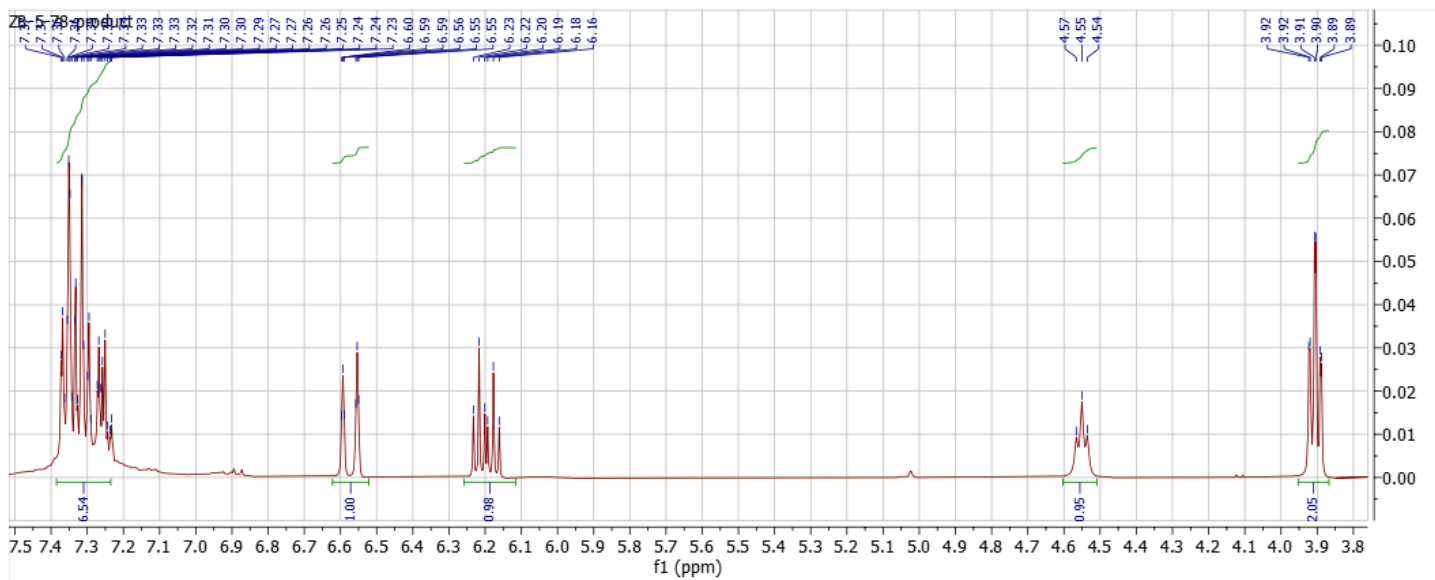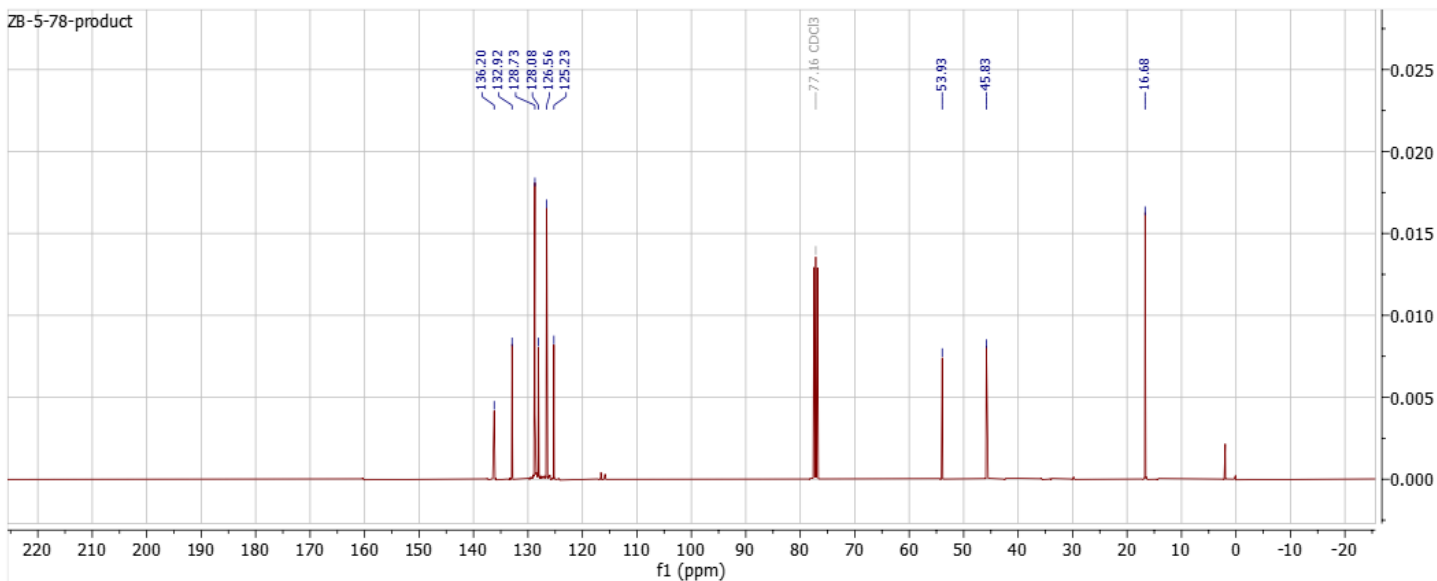

Figure S27. 400 MHz  $^1\text{H}$ -NMR in  $\text{CDCl}_3$  (full and zoom-in of aromatic region) and 101 MHz  $^{13}\text{C}\{^1\text{H}\}$  NMR in  $\text{CDCl}_3$  of Product 27.

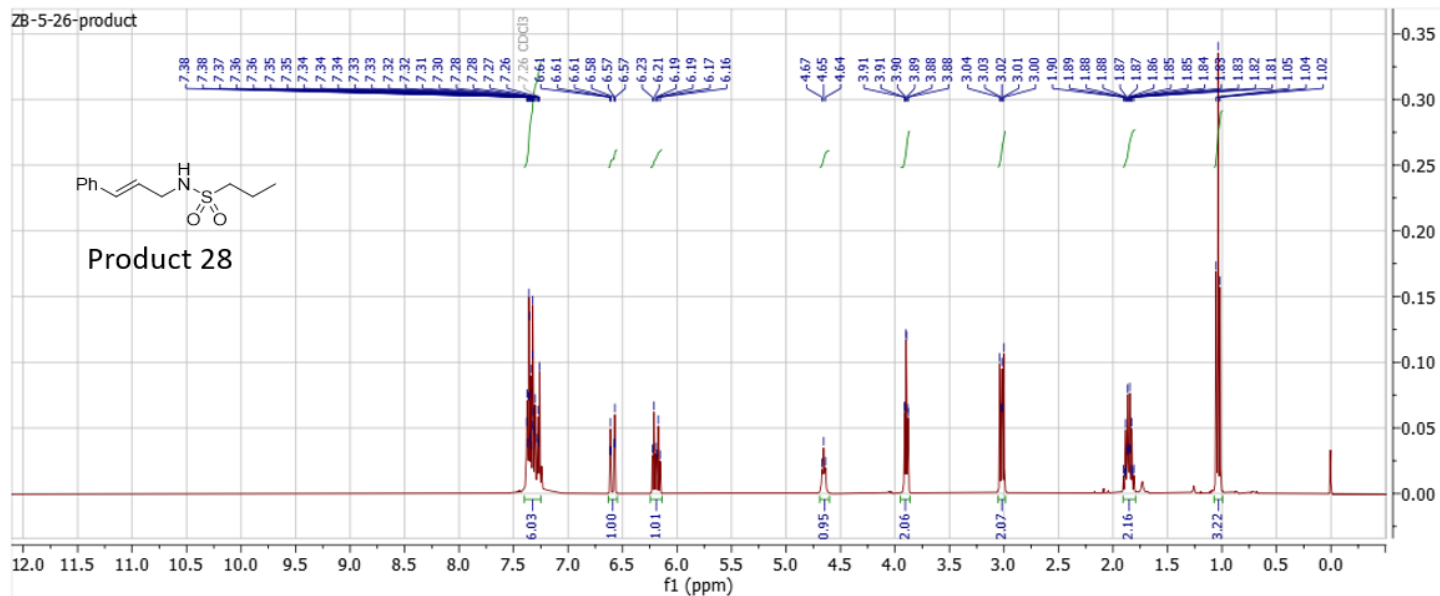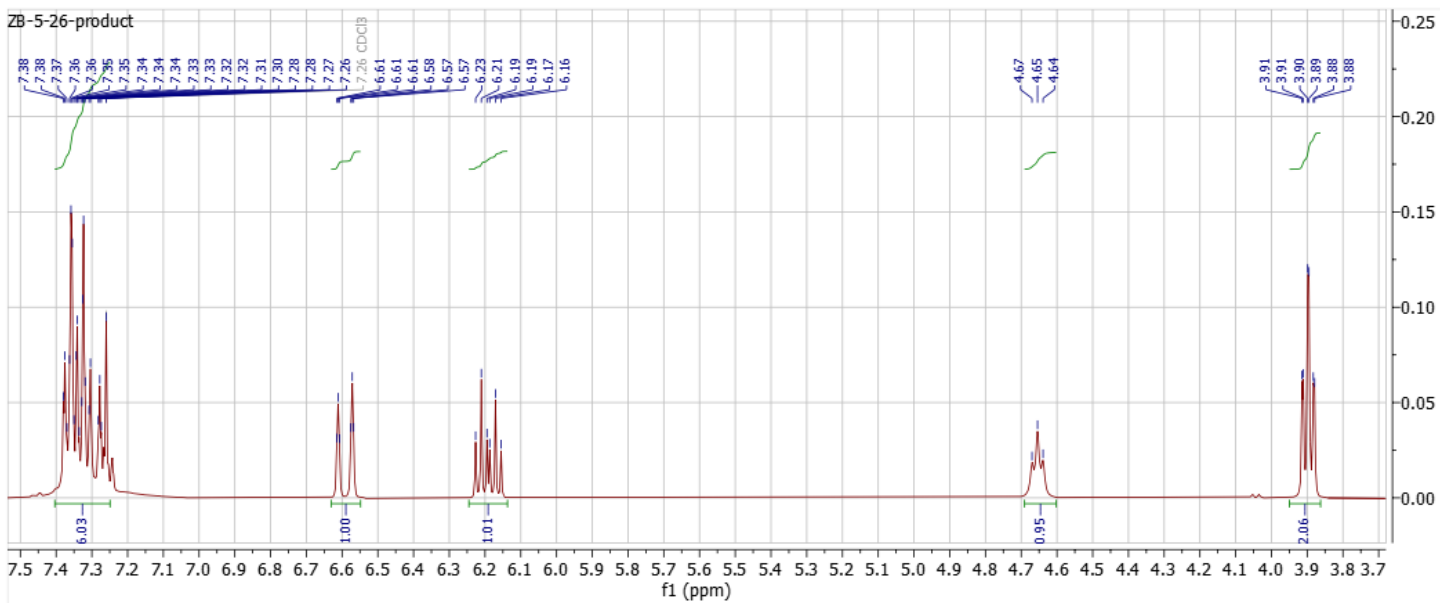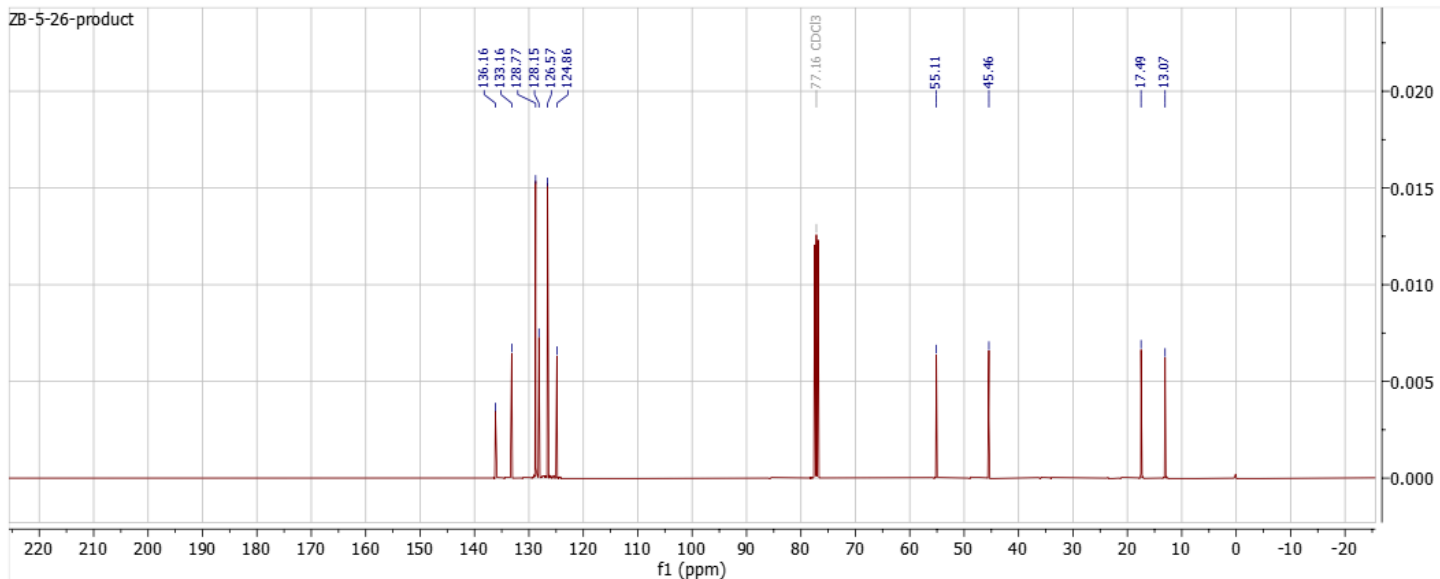

Figure S28. 400 MHz <sup>1</sup>H-NMR in CDCl<sub>3</sub> (full and zoom-in of aromatic region) and 101 MHz <sup>13</sup>C{<sup>1</sup>H} NMR in CDCl<sub>3</sub> of Product 28.

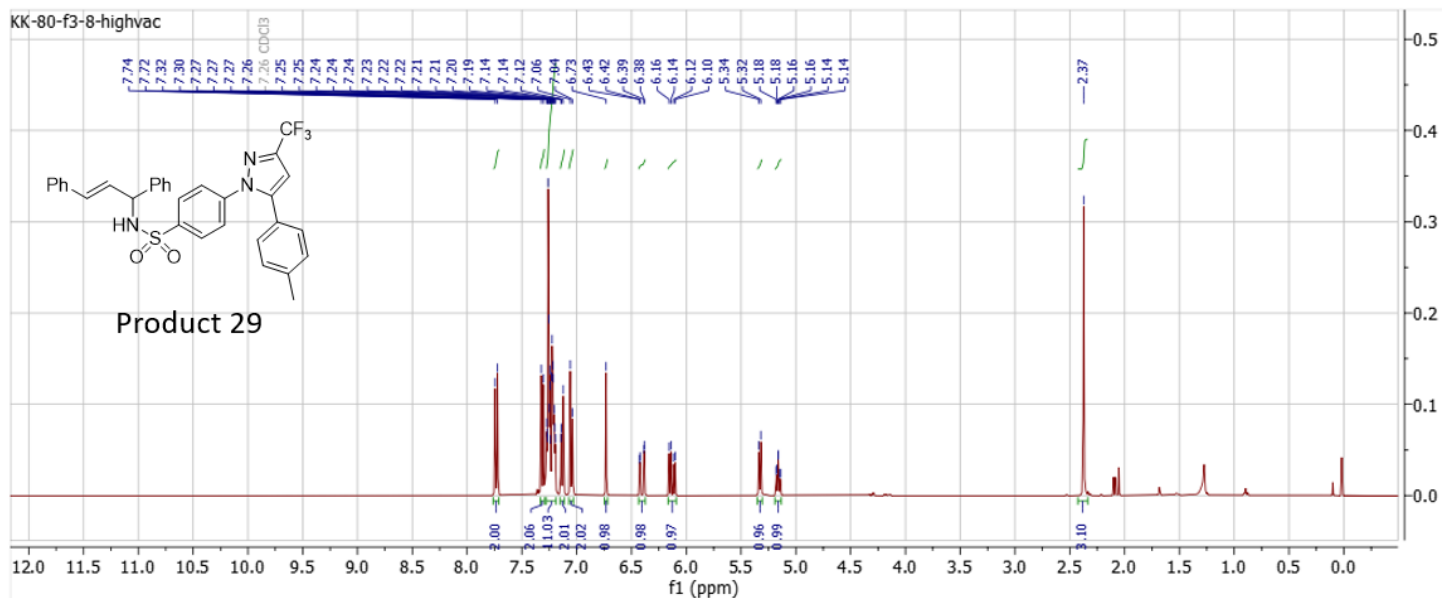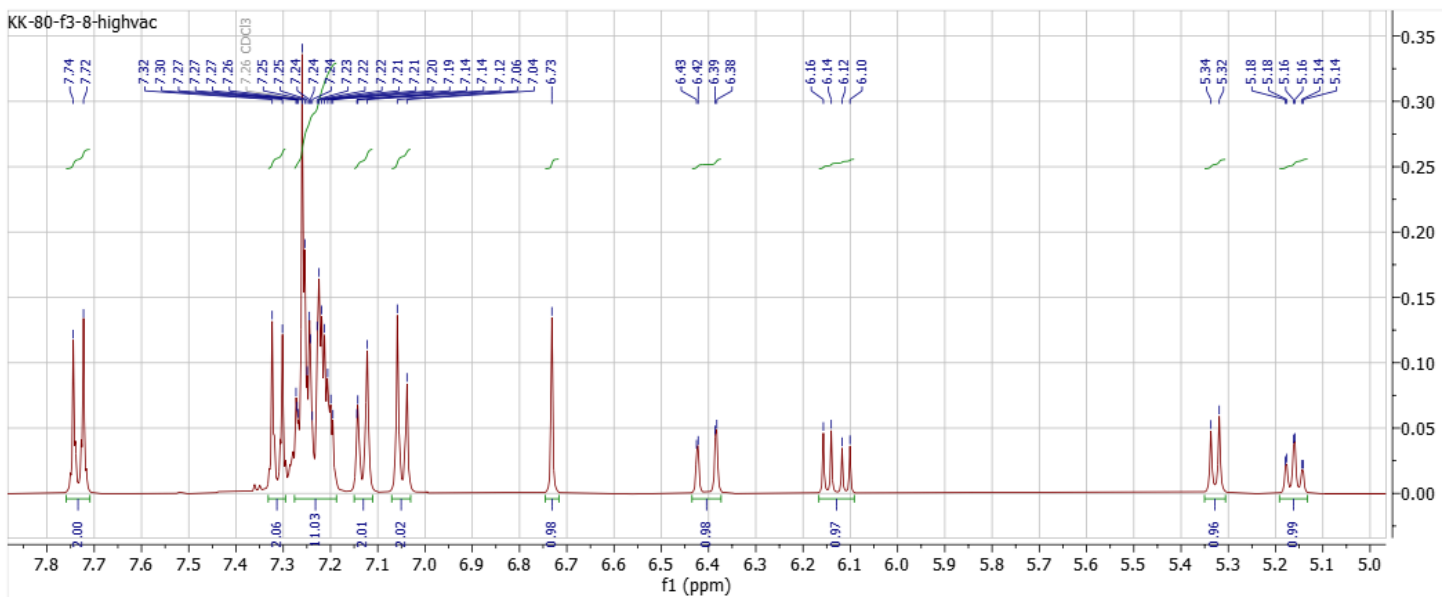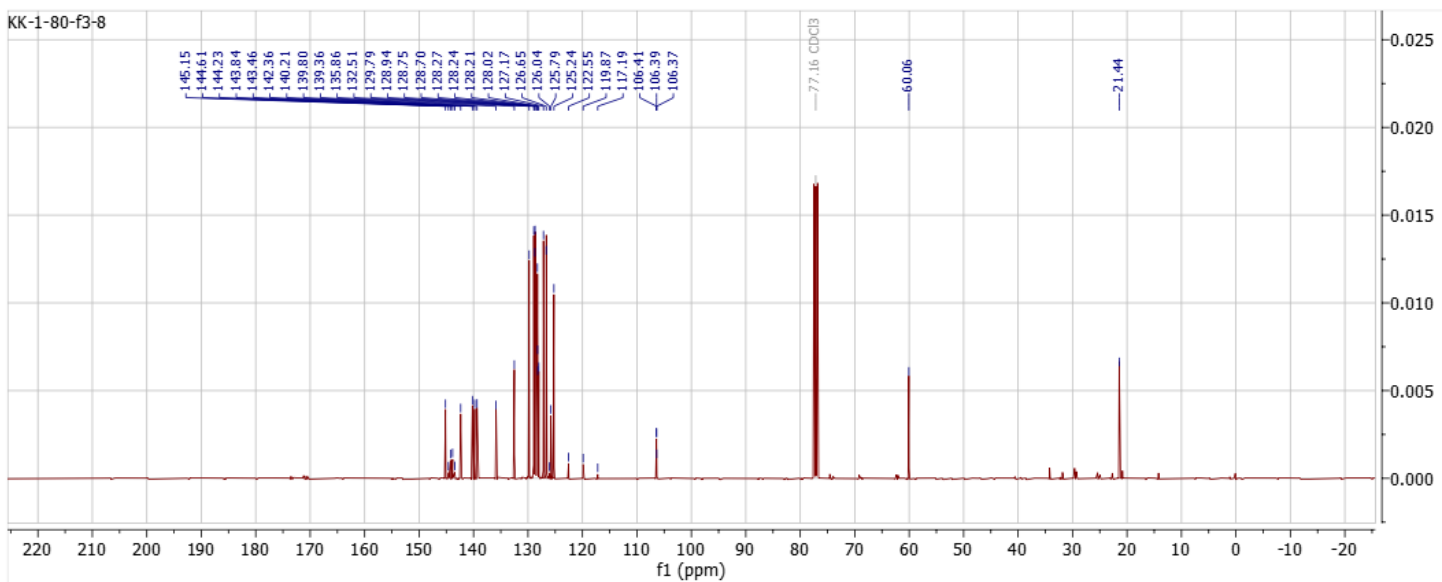

Figure S29. 400 MHz  $^1\text{H-NMR}$  in  $\text{CDCl}_3$  (full and zoom-in of aromatic region) and 101 MHz  $^{13}\text{C}\{^1\text{H}\}$  NMR in  $\text{CDCl}_3$  of Product 29.

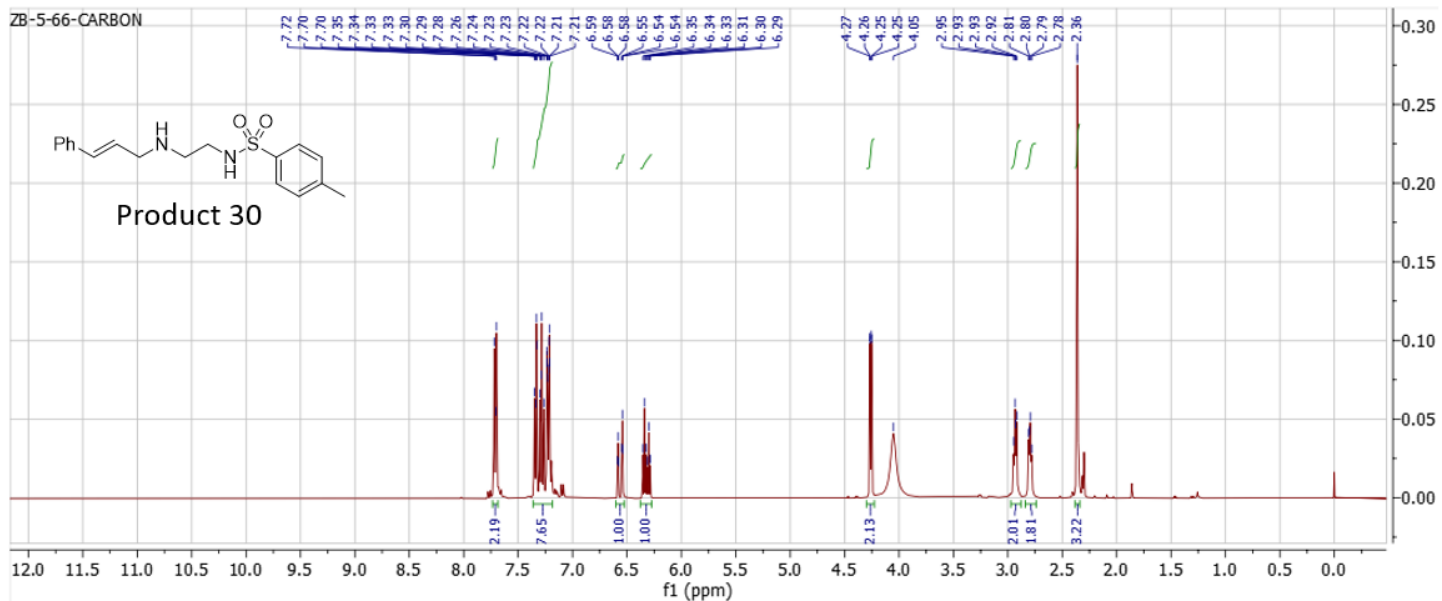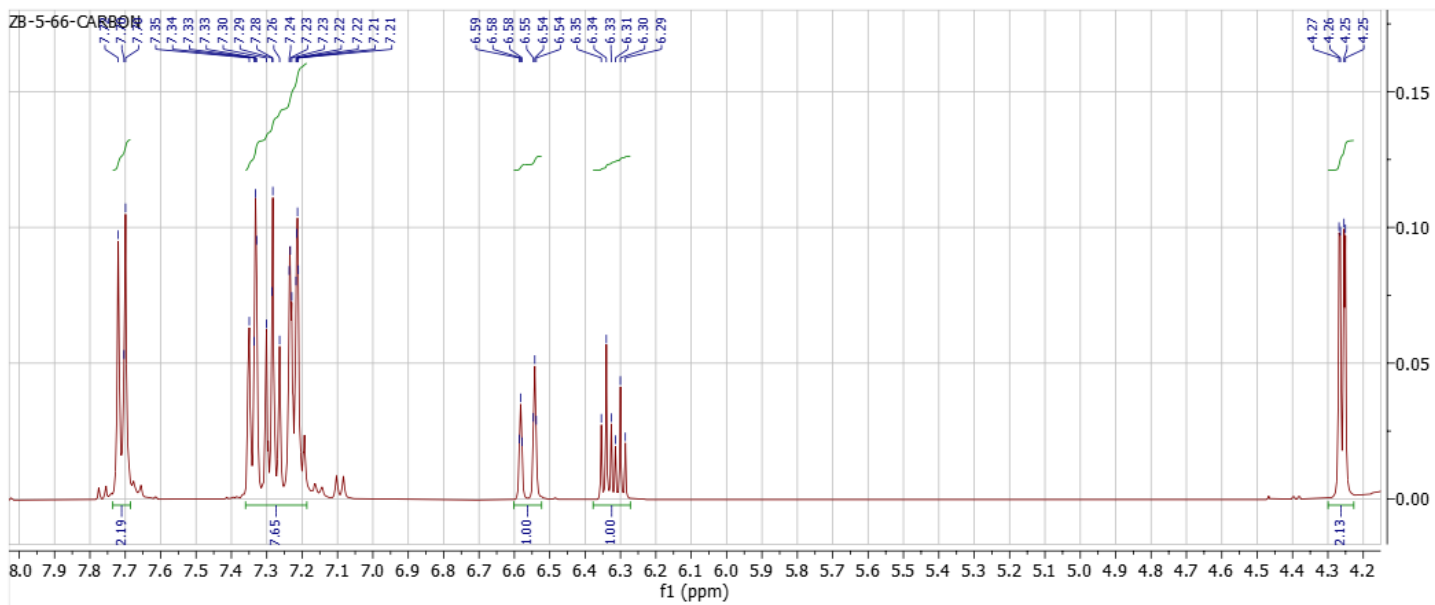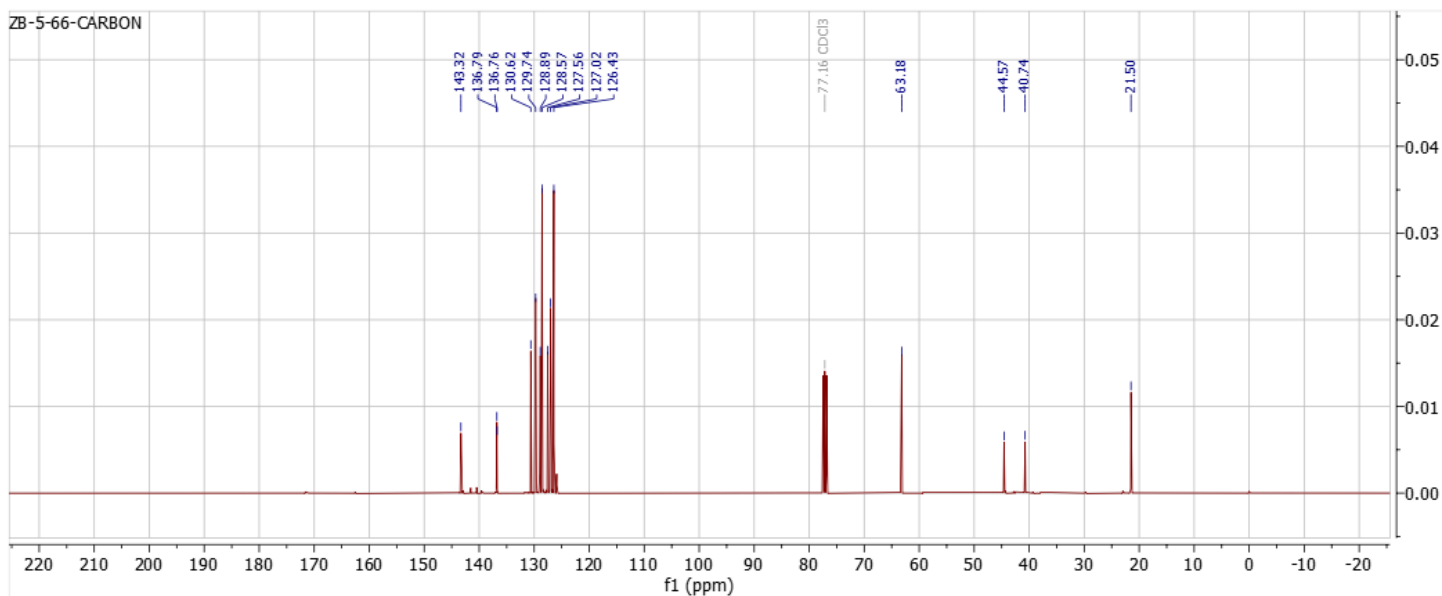

Figure S30. 400 MHz  $^1\text{H}$ -NMR in  $\text{CDCl}_3$  (full and zoom-in of aromatic region) and 101 MHz  $^{13}\text{C}\{^1\text{H}\}$  NMR in  $\text{CDCl}_3$  of Product 30.

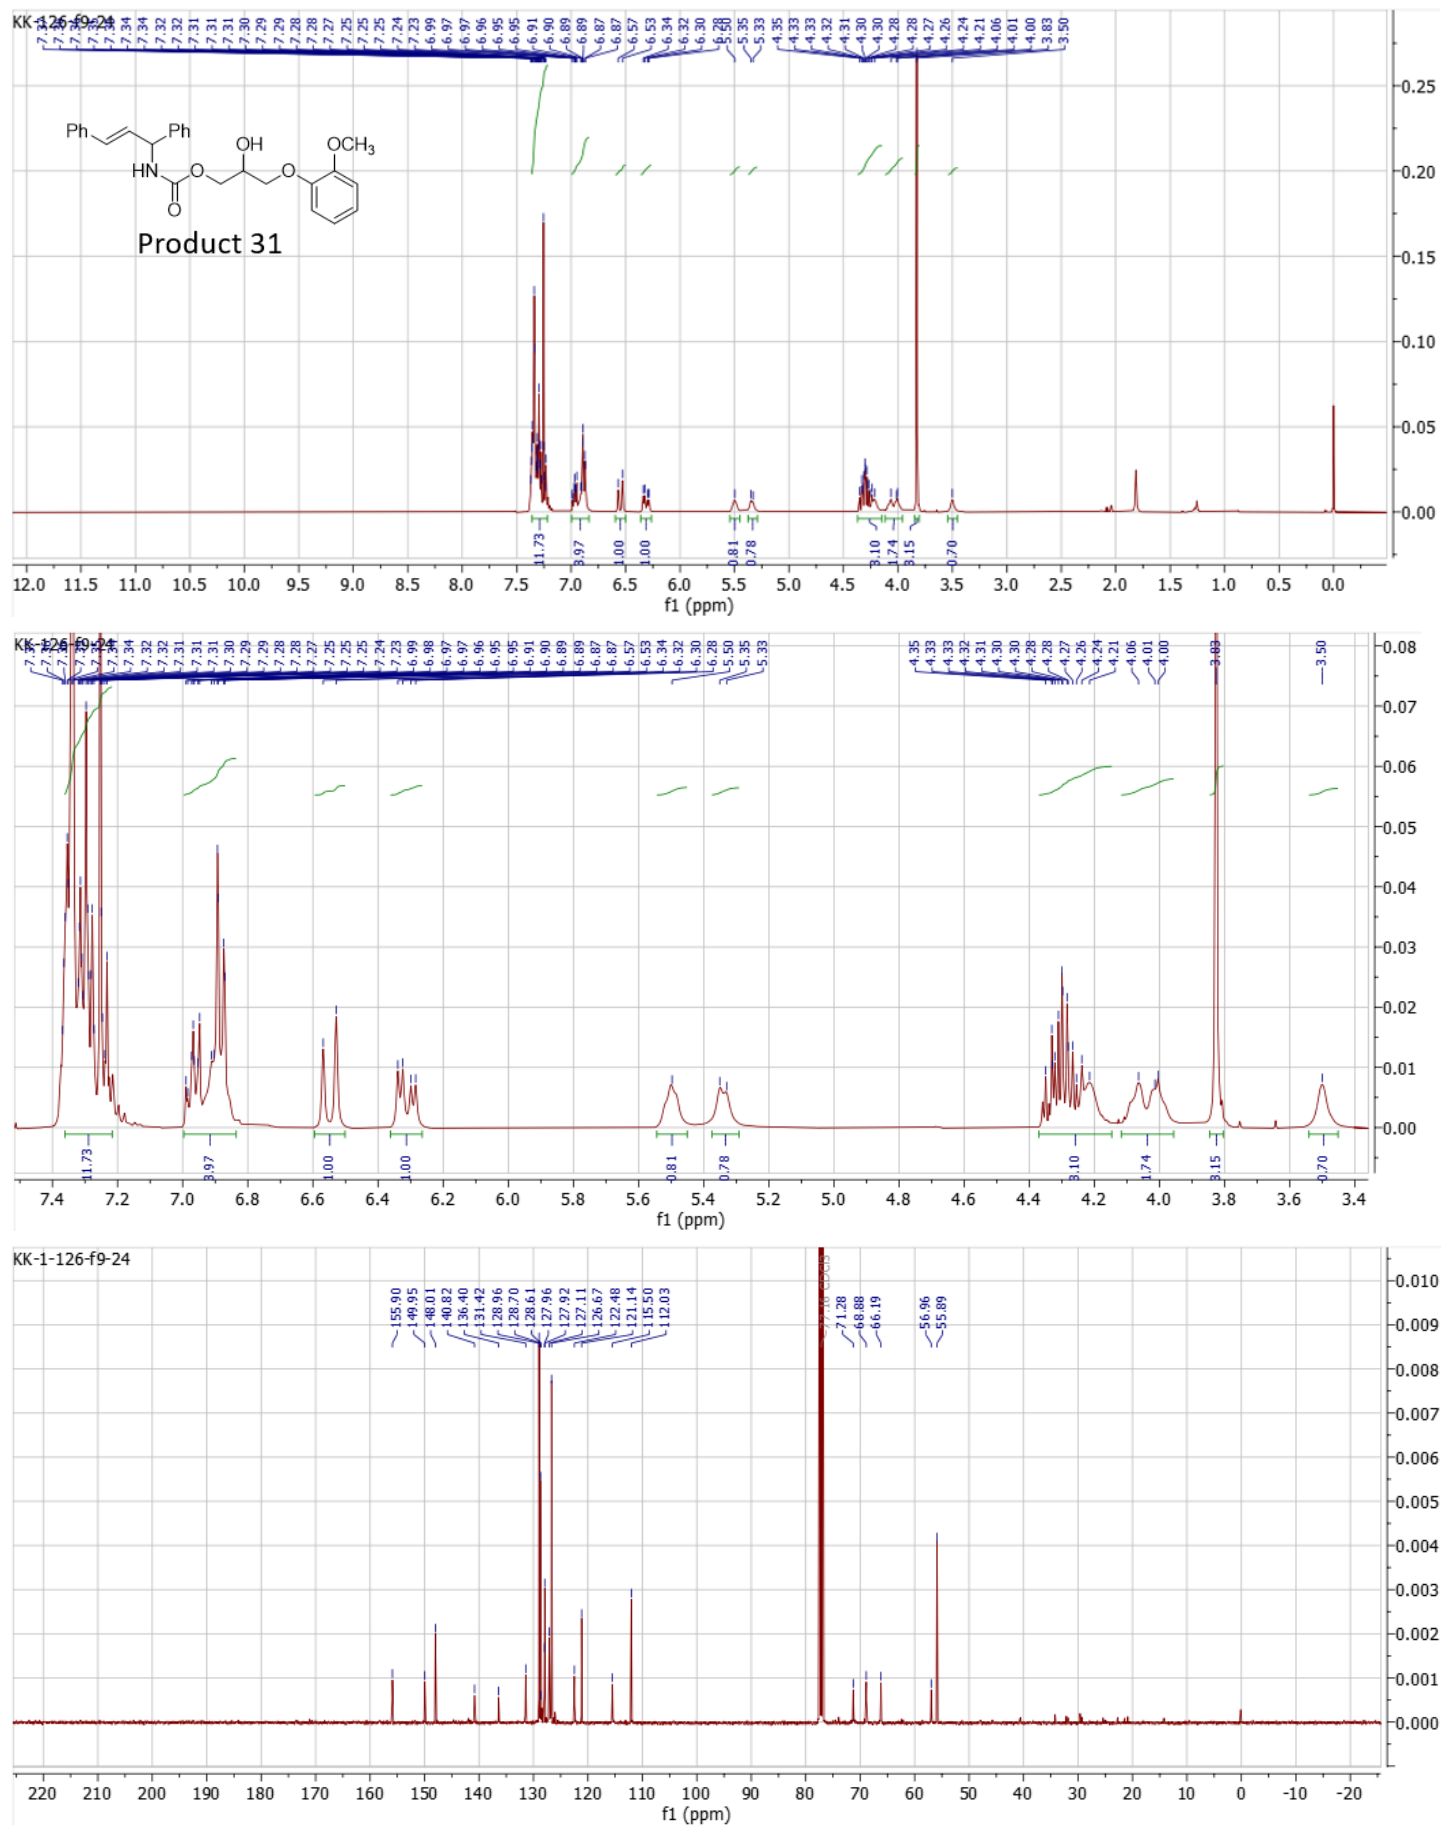

**Table S2.** Biological evaluation of compounds **3-31** (50  $\mu$ M) at 24-hour incubation time using CellTiter-Blue.

| Compound    | H293                              | A549                              | HDF                               |
|-------------|-----------------------------------|-----------------------------------|-----------------------------------|
|             | DMEM media                        | DMEM media                        | DMEM media                        |
| <b>3</b>    | 102.8 $\pm$ 6.7                   | 77.7 $\pm$ 9.3                    | 85.4 $\pm$ 4.0                    |
| <b>4</b>    | 76.8 $\pm$ 3.3                    | 94.8 $\pm$ 11.5                   | 82.8 $\pm$ 2.0                    |
| <b>5</b>    | 75.6 $\pm$ 5.4                    | 96.1 $\pm$ 5.8                    | 82.0 $\pm$ 2.0                    |
| <b>6</b>    | 85.9 $\pm$ 2.4                    | 95.1 $\pm$ 1.4                    | 77.2 $\pm$ 0.1                    |
| <b>7</b>    | <b>44.9 <math>\pm</math> 10.8</b> | <b>48.2 <math>\pm</math> 8.4</b>  | <b>41.1 <math>\pm</math> 0.5</b>  |
| <b>8</b>    | <b>47.2 <math>\pm</math> 1.5</b>  | <b>37.2 <math>\pm</math> 6.9</b>  | <b>49.4 <math>\pm</math> 5.8</b>  |
| <b>9</b>    | <b>63.5 <math>\pm</math> 0.2</b>  | 65.9 $\pm$ 6.7                    | <b>52.3 <math>\pm</math> 8.3</b>  |
| <b>10</b>   | 76.1 $\pm$ 4.4                    | 78.1 $\pm$ 4.2                    | 70.0 $\pm$ 1.2                    |
| <b>11</b>   | 75.2 $\pm$ 3.5                    | 71.5 $\pm$ 12.5                   | 68.3 $\pm$ 1.7                    |
| <b>12</b>   | <b>64.3 <math>\pm</math> 1.3</b>  | 77.4 $\pm$ 15.4                   | <b>55.6 <math>\pm</math> 10.2</b> |
| <b>13</b>   | <b>69.0 <math>\pm</math> 4.9</b>  | <b>55.3 <math>\pm</math> 3.3</b>  | <b>52.4 <math>\pm</math> 9.4</b>  |
| <b>14</b>   | 89.7 $\pm$ 10.7                   | 74.0 $\pm$ 15.6                   | 78.9 $\pm$ 1.3                    |
| <b>15</b>   | 88.9 $\pm$ 2.8                    | <b>61.6 <math>\pm</math> 2.0</b>  | <b>56.8 <math>\pm</math> 8.5</b>  |
| <b>16</b>   | 87.6 $\pm$ 5.7                    | 83.9 $\pm$ 5.3                    | 81.1 $\pm$ 0.5                    |
| <b>17</b>   | 91.3 $\pm$ 3.5                    | 89.6 $\pm$ 3.4                    | 83.9 $\pm$ 12.5                   |
| <b>18</b>   | 91.5 $\pm$ 4.4                    | 64.1 $\pm$ 3.7                    | 69.4 $\pm$ 2.4                    |
| <b>19</b>   | 97.2 $\pm$ 9.5                    | 65.4 $\pm$ 16.0                   | 71.9 $\pm$ 13.4                   |
| <b>20</b>   | <b>58.8 <math>\pm</math> 1.2</b>  | 65.5 $\pm$ 14.2                   | <b>48.8 <math>\pm</math> 0.1</b>  |
| <b>21</b>   | 94.4 $\pm$ 9.0                    | 78.0 $\pm$ 2.3                    | 79.2 $\pm$ 1.6                    |
| <b>22</b>   | 89.3 $\pm$ 1.5                    | 90.2 $\pm$ 6.3                    | 76.0 $\pm$ 10.5                   |
| <b>23</b>   | <b>64.4 <math>\pm</math> 0.9</b>  | <b>54.7 <math>\pm</math> 15.1</b> | <b>51.9 <math>\pm</math> 0.9</b>  |
| <b>24</b>   | 94.1 $\pm$ 6.5                    | 85.0 $\pm$ 19.4                   | 72.5 $\pm$ 0.3                    |
| <b>25</b>   | 79.3 $\pm$ 3.8                    | 66.9 $\pm$ 5.1                    | <b>62.2 <math>\pm</math> 0.9</b>  |
| <b>26</b>   | 105.8 $\pm$ 4.2                   | 86.2 $\pm$ 6.9                    | 81.4 $\pm$ 5.8                    |
| <b>27</b>   | 99.9 $\pm$ 0.9                    | 69.1 $\pm$ 8.5                    | 78.1 $\pm$ 1.2                    |
| <b>28</b>   | 102.2 $\pm$ 1.5                   | 77.8 $\pm$ 19.2                   | 85.7 $\pm$ 6.7                    |
| <b>29</b>   | 93.7 $\pm$ 3.5                    | 82.6 $\pm$ 4.3                    | 70.3 $\pm$ 2.4                    |
| <b>30</b>   | 96.0 $\pm$ 2.1                    | 71.5 $\pm$ 5.7                    | 83.8 $\pm$ 3.3                    |
| <b>31</b>   | 88.0 $\pm$ 4.0                    | 71.3 $\pm$ 5.6                    | <b>61.4 <math>\pm</math> 12.1</b> |
| <b>DMSO</b> | 100.0 $\pm$ 2.3                   | 100.0 $\pm$ 5.0                   | 100.0 $\pm$ 0.5                   |
| <b>+C</b>   | <b>59.0 <math>\pm</math> 2.8</b>  | <b>48.5 <math>\pm</math> 6.0</b>  | <b>55.6 <math>\pm</math> 2.6</b>  |

Values displayed are percent of DMSO control (POC). All values (%) against cell lines were obtained as an average of duplicate measurements (standard deviations also displayed calculated at 85% CI by Microsoft Excel) via the CellTiter-Blue (Promega) assay at 50  $\mu$ M (24 h) in the described cell media. Lower values of POC indicate stronger hits. POC values below 25% of inhibition based upon positive control are highlighted in red. A combination of 1.5  $\mu$ M rotenone, a known OXPHOS inhibitor, and 10 mM 2-DG (a known glycolysis inhibitor) is used as positive control to determine maximum inhibition. DMSO serves as the negative control.

**Table S3.** Biological evaluation of compounds **3-31** (25  $\mu$ M) at 2-hour incubation time using CellTiter-Glo.

| Compound        | H293                       | H293                             |
|-----------------|----------------------------|----------------------------------|
|                 | Minimal media plus glucose | Minimal media plus glutamine     |
| <b>3</b>        | 87.2 $\pm$ 1.8             | <b>28.6 <math>\pm</math> 2.3</b> |
| <b>4</b>        | 84.9 $\pm$ 3.8             | <b>17.1 <math>\pm</math> 0.9</b> |
| <b>5</b>        | 85.5 $\pm$ 5.8             | <b>18.6 <math>\pm</math> 0.1</b> |
| <b>6</b>        | 93.7 $\pm$ 2.8             | <b>31.1 <math>\pm</math> 1.8</b> |
| <b>7</b>        | 69.3 $\pm$ 8.3             | <b>13.6 <math>\pm</math> 0.1</b> |
| <b>8</b>        | 83.5 $\pm$ 3.3             | <b>18.5 <math>\pm</math> 1.1</b> |
| <b>9</b>        | 78.7 $\pm$ 0.1             | <b>20.0 <math>\pm</math> 0.3</b> |
| <b>10</b>       | 95.3 $\pm$ 5.2             | <b>19.8 <math>\pm</math> 0.3</b> |
| <b>11</b>       | 97.9 $\pm$ 1.6             | <b>24.3 <math>\pm</math> 0.1</b> |
| <b>12</b>       | 84.9 $\pm$ 0.8             | <b>18.2 <math>\pm</math> 1.5</b> |
| <b>13</b>       | 87.2 $\pm$ 12.7            | <b>19.8 <math>\pm</math> 1.5</b> |
| <b>14</b>       | 77.4 $\pm$ 6.1             | <b>18.5 <math>\pm</math> 0.2</b> |
| <b>15</b>       | 82.3 $\pm$ 2.2             | <b>33.6 <math>\pm</math> 0.5</b> |
| <b>16</b>       | 84.0 $\pm$ 1.2             | <b>35.6 <math>\pm</math> 0.7</b> |
| <b>17</b>       | 76.1 $\pm$ 1.2             | <b>17.0 <math>\pm</math> 1.2</b> |
| <b>18</b>       | 92.1 $\pm$ 4.0             | 52.9 $\pm$ 15.2                  |
| <b>19</b>       | 93.2 $\pm$ 0.3             | <b>33.0 <math>\pm</math> 4.7</b> |
| <b>20</b>       | 66.7 $\pm$ 5.2             | <b>16.8 <math>\pm</math> 0.2</b> |
| <b>21</b>       | 96.9 $\pm$ 0.3             | 86.2 $\pm$ 1.2                   |
| <b>22</b>       | 93.9 $\pm$ 2.6             | 91.0 $\pm$ 11.1                  |
| <b>23</b>       | 75.6 $\pm$ 4.4             | 55.4 $\pm$ 21.4                  |
| <b>24</b>       | 92.0 $\pm$ 5.9             | 76.8 $\pm$ 1.3                   |
| <b>25</b>       | 57.7 $\pm$ 14.4            | <b>17.7 <math>\pm</math> 4.2</b> |
| <b>26</b>       | 94.4 $\pm$ 0.4             | 85.7 $\pm$ 3.2                   |
| <b>27</b>       | 96.7 $\pm$ 7.7             | 94.7 $\pm$ 6.7                   |
| <b>28</b>       | 96.2 $\pm$ 3.3             | 91.3 $\pm$ 0.9                   |
| <b>29</b>       | 89.7 $\pm$ 2.6             | 75.8 $\pm$ 26.7                  |
| <b>30</b>       | 98.0 $\pm$ 4.0             | 100.3 $\pm$ 1.7                  |
| <b>31</b>       | 73.1 $\pm$ 2.2             | 51.7 $\pm$ 15.2                  |
| <b>DMSO</b>     | 100.0 $\pm$ 1.8            | 100.0 $\pm$ 6.1                  |
| <b>Rotenone</b> | 80.6 $\pm$ 3.3             | 16.4 $\pm$ 1.9                   |

Values displayed are percent of DMSO control (POC). All values (%) against cell lines were obtained as an average of duplicate measurements (standard deviations also displayed calculated at 85% CI by Microsoft Excel) via the CellTiter-Glo (Promega) assay at 25  $\mu$ M (2 h) in the described cell media. Lower values of POC indicate stronger hits. Rotenone, a known OXPHOS inhibitor, is used as positive control to determine maximum inhibition in "minimal media + glutamine". POC values below 25% of inhibition based upon positive control are highlighted in red. DMSO serves as the negative control.

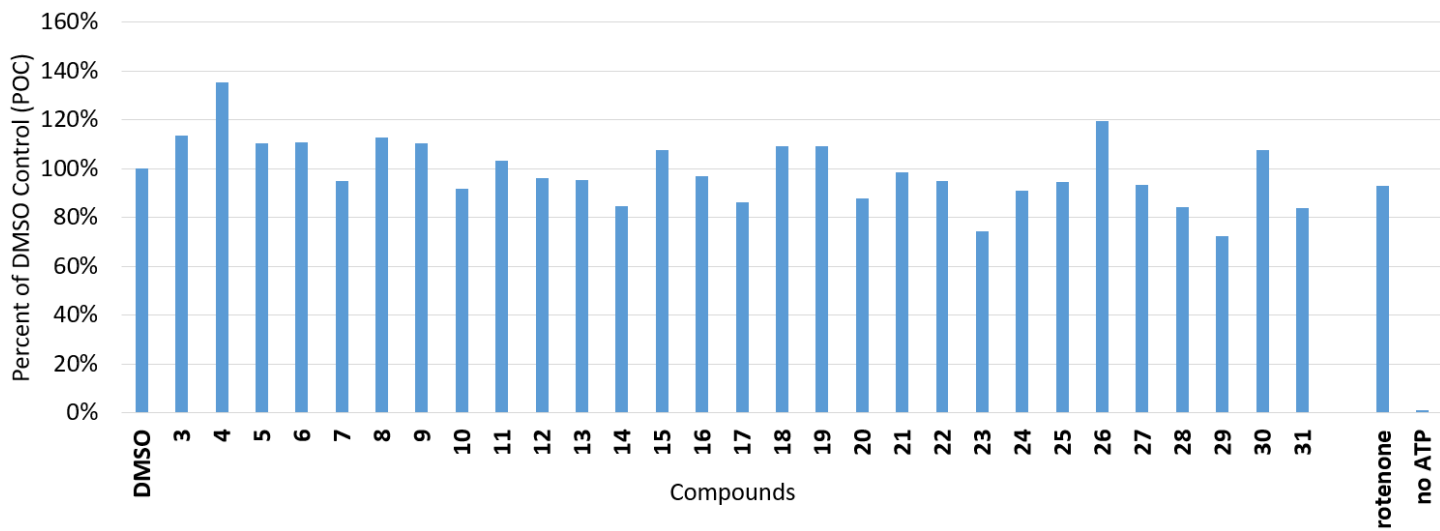

**Figure S32.** Luciferase inhibition assay using compounds **3-31** (50  $\mu$ M, 10 min exposure; CTG). Exogenous ATP was added to wells containing the compounds (no cells were used). Values are shown as percent of DMSO control (POC).
